# Supplementary material for: Enhanced involvement of general practitioners in cancer rehabilitation: a randomised controlled trial
Source: PubMed Central journal article supplement — BMJ Open. 2012 Apr 16;2(2):e000764. doi: 10.1136/bmjopen-2011-000764 (PMC3332246; doi:10.1136/bmjopen-2011-000764), 2012-04-16
Supplement: bmjopen-2011-000764-s1.pdf [file bmjopen-2011-000764-s1.pdf]

## Checklist of items to include when reporting a cluster randomised trial

| * = addition to CONSORT <i>Modifications to checklist in italics</i> |      |                                                                                                                                                                                                                                                                                                                                                                                                  |                      |
|----------------------------------------------------------------------|------|--------------------------------------------------------------------------------------------------------------------------------------------------------------------------------------------------------------------------------------------------------------------------------------------------------------------------------------------------------------------------------------------------|----------------------|
| PAPER SECTION and topic                                              | Item | Descriptor                                                                                                                                                                                                                                                                                                                                                                                       | Reported on Page No. |
| <i>TITLE &amp; ABSTRACT</i>                                          | 1*   | How participants were allocated to interventions (e.g., “random allocation”, “randomised”, or “randomly assigned”), <i>specifying that allocation was based on clusters</i>                                                                                                                                                                                                                      | 2                    |
| <i>INTRODUCTION</i><br>Background                                    | 2*   | Scientific background and explanation of rationale, <i>including the rationale for using a cluster design.</i>                                                                                                                                                                                                                                                                                   | 4+8                  |
| <i>METHODS</i><br>Participants                                       | 3*   | Eligibility criteria for participants <i>and clusters</i> and the settings and locations where the data were collected.                                                                                                                                                                                                                                                                          | 5                    |
| Interventions                                                        | 4*   | Precise details of the interventions intended for each group, <i>whether they pertain to the individual level, the cluster level or both</i> , and how and when they were actually administered.                                                                                                                                                                                                 | 6-7                  |
| Objectives                                                           | 5*   | Specific objectives and hypotheses, <i>and whether they pertain to the individual level, the cluster level or both.</i>                                                                                                                                                                                                                                                                          | 4                    |
| Outcomes                                                             | 6*   | Report clearly defined primary and secondary outcome measures, <i>whether they pertain to the individual level, the cluster level or both</i> , and, when applicable, any methods used to enhance the quality of measurements (e.g., multiple observations, training of assessors).                                                                                                              | 7                    |
| Sample size                                                          | 7*   | How <i>total</i> sample size was determined ( <i>including method of calculation, number of clusters, cluster size, a coefficient of intracluster correlation (ICC or k), and an indication of its uncertainty</i> ) and, when applicable, explanation of any interim analyses and stopping rules.                                                                                               | 8                    |
| Randomisation.<br>Sequence generation                                | 8*   | Method used to generate the random allocation sequence, including details of any restriction (e.g., blocking, stratification, <i>matching</i> ).                                                                                                                                                                                                                                                 | 5+8                  |
| Allocation concealment                                               | 9*   | Method used to implement the random allocation sequence, <i>specifying that allocation was based on clusters rather than individuals and clarifying whether the sequence was concealed until interventions were assigned.</i>                                                                                                                                                                    |                      |
| Implementation                                                       | 10   | Who generated the allocation sequence, who enrolled participants, and who assigned participants to their groups.                                                                                                                                                                                                                                                                                 |                      |
| Blinding (Masking)                                                   | 11   | Whether or not participants, those administering the interventions, and those assessing the outcomes were blinded to group assignment. If done, how the success of blinding was evaluated.                                                                                                                                                                                                       | 8-9                  |
| Statistical methods                                                  | 12*  | Statistical methods used to compare groups for primary outcome(s) <i>indicating how clustering was taken into account</i> ; methods for additional analyses, such as subgroup analyses and adjusted analyses.                                                                                                                                                                                    | 9                    |
| <i>RESULTS</i><br>Participant flow                                   | 13*  | Flow of <i>clusters and</i> individual participants through each stage (a diagram is strongly recommended). Specifically, for each group report the numbers of <i>clusters and</i> participants randomly assigned, receiving intended treatment, completing the study protocol, and analyzed for the primary outcome. Describe protocol deviations from study as planned, together with reasons. | 10+15 (Figure 1)     |
| Recruitment                                                          | 14   | Dates defining the periods of recruitment and follow-up.                                                                                                                                                                                                                                                                                                                                         | 5+15 (Figure 1)      |
| Baseline data                                                        | 15*  | Baseline information for each group <i>for the individual and cluster levels as applicable</i>                                                                                                                                                                                                                                                                                                   | 17 (Table 1)         |
| Numbers analyzed                                                     | 16*  | Number of <i>clusters and</i> participants (denominator) in each group included in each analysis and whether the analysis was by “intention-to-treat”. State the results in absolute numbers when feasible (e.g., 10/20, not 50%).                                                                                                                                                               | 10                   |
| Outcomes and Estimation                                              | 17*  | For each primary and secondary outcome, a summary of results for each group measures <i>for the individual or cluster level as applicable</i> , and the estimated effect size and its precision (e.g., 95% confidence interval) <i>and a coefficient of intracluster correlation (ICC or k) for each primary outcome.</i>                                                                        | 10+18-19 (Table 2+3) |
| Ancillary analyses                                                   | 18   | Address multiplicity by reporting any other analyses performed,                                                                                                                                                                                                                                                                                                                                  | 10                   |

|                                     |     |                                                                                                                                                                                      |       |
|-------------------------------------|-----|--------------------------------------------------------------------------------------------------------------------------------------------------------------------------------------|-------|
|                                     |     | including subgroup analyses and adjusted analyses, indicating those pre-specified and those exploratory.                                                                             |       |
| Adverse events                      | 19  | All important adverse events or side effects in each intervention group.                                                                                                             | None  |
| <i>DISCUSSION</i><br>Interpretation | 20  | Interpretation of the results, taking into account study hypotheses, sources of potential bias or imprecision and the dangers associated with multiplicity of analyses and outcomes. | 10-12 |
| Generalisability                    | 21* | Generalisability (external validity) <i>to individuals and/or clusters (as relevant)</i> of the trial findings.                                                                      | 12-13 |
| Overall evidence                    | 22  | General interpretation of the results in the context of current evidence.                                                                                                            | 13-14 |
