# Supplementary material for: Enhanced involvement of general practitioners in cancer rehabilitation: a randomised controlled trial
Source: PubMed Central journal article supplement — BMJ Open. 2012 Apr 16;2(2):e000764. doi: 10.1136/bmjopen-2011-000764 (PMC3332246; doi:10.1136/bmjopen-2011-000764), 2012-04-16
Supplement: bmjopen-2011-000764.draft_revisions.pdf [file bmjopen-2011-000764.draft_revisions.pdf]

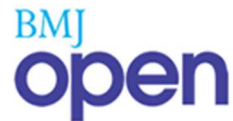

**Enhanced involvement of general practitioners in cancer rehabilitation: a randomised controlled trial**

|                                 |                                                                                                                                                                                                                                                                                                                                                                                                                                                                                                                                                                                                                                                                                                               |
|---------------------------------|---------------------------------------------------------------------------------------------------------------------------------------------------------------------------------------------------------------------------------------------------------------------------------------------------------------------------------------------------------------------------------------------------------------------------------------------------------------------------------------------------------------------------------------------------------------------------------------------------------------------------------------------------------------------------------------------------------------|
| Journal:                        | <i>BMJ Open</i>                                                                                                                                                                                                                                                                                                                                                                                                                                                                                                                                                                                                                                                                                               |
| Manuscript ID:                  | bmjopen-2011-000764                                                                                                                                                                                                                                                                                                                                                                                                                                                                                                                                                                                                                                                                                           |
| Article Type:                   | Research                                                                                                                                                                                                                                                                                                                                                                                                                                                                                                                                                                                                                                                                                                      |
| Date Submitted by the Author:   | 15-Dec-2011                                                                                                                                                                                                                                                                                                                                                                                                                                                                                                                                                                                                                                                                                                   |
| Complete List of Authors:       | Bergholdt, Stinne; National Research Centre for Cancer Rehabilitation, Research Unit of General Practice, University of Southern Denmark<br>Larsen, Pia; National Research Centre for Cancer Rehabilitation, Research Unit of General Practice, University of Southern Denmark<br>Kragstrup, Jakob; National Research Centre for Cancer Rehabilitation, Research Unit of General Practice, University of Southern Denmark<br>Søndergaard, Jens; National Research Centre for Cancer Rehabilitation, Research Unit of General Practice, University of Southern Denmark<br>Hansen, Dorte; National Research Centre for Cancer Rehabilitation, Research Unit of General Practice, University of Southern Denmark |
| <b>Primary Subject Heading</b>: | Rehabilitation medicine                                                                                                                                                                                                                                                                                                                                                                                                                                                                                                                                                                                                                                                                                       |
| Secondary Subject Heading:      | Communication, General practice / Family practice, Health services research, Oncology, Public health                                                                                                                                                                                                                                                                                                                                                                                                                                                                                                                                                                                                          |
| Keywords:                       | REHABILITATION MEDICINE, PUBLIC HEALTH, PRIMARY CARE, ONCOLOGY, HEALTH SERVICES ADMINISTRATION & MANAGEMENT                                                                                                                                                                                                                                                                                                                                                                                                                                                                                                                                                                                                   |
|                                 |                                                                                                                                                                                                                                                                                                                                                                                                                                                                                                                                                                                                                                                                                                               |

SCHOLARONE™  
Manuscripts

only

1  
2  
3  
4  
5  
6  
7 **Enhanced involvement of general practitioners in cancer**  
8 **rehabilitation: a randomised controlled trial.**  
9

10  
11  
12  
13  
14  
15  
16  
17  
18  
19 Stinne Holm Bergholdt, MD, PhD fellow<sup>1§</sup>, Pia Veldt Larsen, statistician<sup>1</sup>, Jakob Kragstrup,  
20 professor<sup>1</sup>, Jens Søndergaard, professor<sup>1</sup>, Dorte Gilså Hansen, assistant professor<sup>1</sup>  
21  
22  
23

24  
25  
26  
27  
28 <sup>1</sup> National Research Centre for Cancer Rehabilitation, Research Unit of General Practice,  
29 University of Southern Denmark, J. B. Winsløws Vej 9B, 5000 Odense C, Denmark  
30  
31

32  
33 § Correspondence to:  
34

35  
36 SH Bergholdt, sbergholdt@health.sdu.dk  
37

38  
39 Keywords: Cancer, rehabilitation, general practice, quality of life, general practitioners  
40  
41

42 Words: 2531  
43  
44  
45  
46  
47  
48  
49  
50  
51  
52  
53  
54  
55  
56  
57  
58  
59  
60

## Abstract

Objective: To test the hypothesis that a multimodal intervention giving the general practitioner (GP) an enhanced role in cancer rehabilitation improves patients' health-related quality of life and psychological distress.

Design: Cluster randomised controlled trial. All general practices in Denmark were randomised to an intervention group or to a control group. Patients were subsequently allocated to intervention or control (usual procedures) based on the randomisation status of their GP.

Setting: All clinical departments at a public regional hospital treating cancer patients and all general practices in Denmark.

Participants: Adult patients treated for incident cancer at Vejle Hospital, Denmark, between 12 May 2008 and 28 February 2009. A total of 955 patients (486 to intervention, 469 to control group) registered with 323 general practices were included.

Intervention: The intervention included an interview about rehabilitation needs with a rehabilitation coordinator at the regional hospital, information from the hospital to the GP about individual needs for rehabilitation and an encouragement of the GP to contact the patient to offer his support with rehabilitation.

Main outcome measures: The primary outcome was health-related quality of life measured 6 months after inclusion using the European Organisation for the Research and Treatment of Cancer Quality of Life Questionnaire Core 30 (EORTC QLQ-C30). Secondary outcomes included quality of life at 14 months and additional subscales of the EORTC QLQ-C30 at 6 and 14 months, and psychological distress at 14 months using the Profile of Mood States (POMS) scale.

1  
2  
3  
4 Results: No effect of the intervention was observed on primary and/or secondary  
5  
6 outcomes after 6 and 14 months.  
7

8  
9 Conclusion: A multimodal intervention aiming to give the GP an enhanced role in cancer  
10  
11 patients' rehabilitation did not improve quality of life or psychological distress.  
12

13 Trial registration: ClinicalTrials.gov, registration ID number NCT01021371.  
14  
15  
16  
17  
18  
19  
20  
21  
22  
23  
24  
25  
26  
27  
28  
29  
30  
31  
32  
33  
34  
35  
36  
37  
38  
39  
40  
41  
42  
43  
44  
45  
46  
47  
48  
49  
50  
51  
52  
53  
54  
55  
56  
57  
58  
59  
60

## Background

Addressing the unmet needs of individual rehabilitation of cancer patients is paramount (1-4). The underlying problems are often psychological or social and many persist after treatment or emerge late in the illness continuum (5-8). Rehabilitation is defined by WHO as “a process intended to enable people with disabilities to reach and maintain optimal physical, sensory, intellectual, psychological and/or social function” (9) which is the conceptual frame for this study. Hence, rehabilitation is a complex and long-lasting process, but evidence on how and when to identify the patients’ needs, what initiatives to offer, and how to manage the efforts is sparse (2;10-13).

General practice is characterised by continuity with frequent encounters with each patient, covering wide-ranging issues (14). Hence, general practitioners (GPs) generally have profound knowledge about the patients’ prior health status, mental vulnerability and social network. General practice may, therefore, be able to initiate the rehabilitation process and take on the task of coordinating or providing the rehabilitation services needed, but currently the role of GPs is not well-defined (15-23). Studies do, however, show that GPs are willing to undertake these tasks and that the patients wish that their GPs were more proactive in doing so (24-25).

The objective of this trial was to investigate the effect of a multimodal intervention giving the GP an enhanced role in improving patients’ health-related quality of life and psychological distress following cancer. To validate our results we conducted subgroup analyses of the large and homogeneous group of breast cancer patients.

## Material and methods

We conducted a cluster randomised, controlled trial where all general practices in Denmark were randomised to an intervention group or to a control group by means of the unique provider number of each practice. Patients were subsequently allocated according to the randomisation of their GP. Feasibility of the intervention and the study details have previously been published (26).

### *Participants*

All adult patients ( $\geq 18$  years) newly diagnosed with cancer and admitted to Vejle Hospital between 12 May 2008 and 28 February 2009 were assessed for eligibility. Patients were included if treated at Vejle Hospital for a cancer diagnosed within the last 3 months and if listed with a general practice. Patients with carcinoma in situ or non-melanoma skin cancers were not included (Figure 1).

Two rehabilitation coordinators, both nurses with oncological experience, assessed all patients for eligibility and managed the intervention. The patients were sampled across departments, type of cancer, stage, and potential rehabilitation needs by use of the electronic patient files (26).

### *Setting*

The study was conducted at Vejle Hospital, a public general hospital in the region of Southern Denmark (1.2 million inhabitants) (27). Cancer patients were allocated from all of Denmark.

The Danish publicly funded healthcare system ensures free access to general practice which is responsible for primary care needs, and GPs function as gatekeepers to

1  
2  
3  
4 the rest of the healthcare system. More than 98% of all Danish residents are registered  
5  
6 with a general practice. On average each GP meets 9 incident cancer patients during one  
7  
8 year (28).  
9

10  
11 GPs' opportunities to refer patients to relevant rehabilitation services vary between  
12  
13 the different municipalities, just as the availability of private patient associations and other  
14  
15 relief organisations. These conditions might influence the quality of the rehabilitation  
16  
17 interventions offered.  
18  
19

### 20 21 *The intervention*

22  
23 The intervention comprised a patient interview about rehabilitation needs performed by the  
24  
25 rehabilitation coordinators, followed by information to the GP about the patient's individual  
26  
27 rehabilitation needs and cancer patients' rehabilitation needs in general. The core of the  
28  
29 information was that the GP was encouraged to contact the patient to facilitate a  
30  
31 rehabilitation process (Figure 2).  
32  
33

34  
35 The patient interviews were conducted according to an interview guide (29) and  
36  
37 based on a checklist of general needs and problems among cancer patients (Figure 3).  
38  
39 Interviews were most often conducted at the hospital, but in some cases by phone. During  
40  
41 the interview, the concept of rehabilitation was explained and the individual needs for  
42  
43 physical, psychological, sexual, social, work- and economy-related rehabilitation were  
44  
45 identified. It was explained that physical, psychological, sexual, social, work-related and  
46  
47 financial issues (1-4;30) might occur at any time and change during the disease trajectory  
48  
49 (7-8). In order to address these problems, patients were advised to consult their GP during  
50  
51 treatment and after discharge.  
52  
53  
54  
55  
56  
57  
58  
59  
60

1  
2  
3  
4 Following each interview, the patient's GP was informed about the patient's actual  
5  
6 problems and needs for rehabilitation and encouraged to be proactive, i.e. the GP was  
7  
8 encouraged to contact the patient personally to offer support and guidance in order to  
9  
10 identify and address actual and future needs for rehabilitation. Subsequently, the GP  
11  
12 received an e-mail summarising the information, supplemented by general information  
13  
14 about cancer patients' needs and problems (Figure 3). The information was personally  
15  
16 conveyed by phone, if possible, and always sent electronically along with the more general  
17  
18 information. Patients and GPs in the control group received the usual care and were not  
19  
20 contacted by the rehabilitation coordinators (26).  
21  
22  
23  
24  
25

### 26 *Outcomes and sampling of data*

27  
28 The primary outcome was health-related quality of life measured 6 months after inclusion  
29  
30 using the Global Health Status of the European Organization for Research and Treatment  
31  
32 of Cancer Quality of Life Questionnaire Core 30 (EORTC QLQ-C30) (31;32). The  
33  
34 secondary outcomes were psychological distress at 14 months assessed by the 6 scales  
35  
36 of the Profile of Mood States (POMS) (33) (depression/dejection, anger/hostility,  
37  
38 tension/anxiety, vigour/activity, fatigue/inertia and confusion/bewilderment), and the Global  
39  
40 Health Status at 6 months and functional (physical, emotional, role, cognitive or social  
41  
42 functioning) and symptom scales (fatigue, nausea/vomiting, pain, dyspnoea, insomnia,  
43  
44 appetite loss, constipation, diarrhoea or financial difficulties) of the EORTC QLQ-C30 at 6  
45  
46 and 14 months.  
47  
48  
49

50 Data were sampled in identical ways irrespective of allocation status by use of  
51  
52 patient questionnaires administered to patients alive at 6 and 14 months after inclusion.  
53  
54 Non-responders were sent one reminder after 3 weeks (26).  
55  
56  
57  
58  
59  
60



### *Sample size*

The sample size was estimated based on the primary outcome measure. According to the EORTC Tables of Reference Values (34) for all cancer patients, all stages, the Global Health Status is normally distributed with a mean of 61.3 and an SD of 24.2. A change of at least 8 units was assumed to be clinically relevant (34;35).

If the lowest acceptable statistical power was 80%, then, based on the two-sample t-test with a type 1 error  $\alpha=0.05$ , the sample size was calculated to be 144 patients per group. The study was subject to clustering because the unit of randomisation was at the level of the GP, whereas the primary outcome measure was at the level of the patient. A strong effect on outcome of the individual practice was expected, but no data supported estimation of cluster effect. To allow maximum clustering it was attempted to include patients to each group from a minimum of 144 practices.

### *Randomisation*

Prior to study start, all 2181 general practices in Denmark were randomly allocated to the intervention or control group by the unique provider number of each practice using a computerised random-number generator in the statistical program Stata version 10.0 (StataCorp, College Station, TX, USA). Hence, randomisation was performed at practice level meaning that all GPs working under the same provider number were allocated to the same group. Consequently, spill-over effect between GPs and patients from the same practice was minimised.

### *Blinding*

1  
2  
3  
4 The study was not blinded. The list of randomisation was available to the RCs during  
5  
6 assessment of patient eligibility. Allocation status was obvious during intervention.  
7  
8  
9

### 10 11 *Statistical analysis*

12  
13 Baseline patient characteristics were described using descriptive statistics in order to  
14  
15 present the distribution of age, sex and cancer type. We conducted intention to treat  
16  
17 analyses and numerical outcomes of the RCT were analysed using a multi-level linear  
18  
19 model, accounting for possible cluster effects caused by the cluster randomisation. All  
20  
21 secondary outcomes were adjusted for confounding effect of age and sex. Missing values  
22  
23 were regarded as missing at random.  
24  
25

26 The statistical analyses were performed using Stata version 11.0 (StataCorp,  
27  
28 College Station, TX, USA).  
29  
30  
31  
32

### 33 *Development and piloting of questionnaires and intervention*

34  
35 Before designing the intervention we established a theoretical basis through review of  
36  
37 papers, reports and textbooks about the problems faced by cancer patients and GPs with  
38  
39 respect to individual rehabilitation and continuity across healthcare sectors (1-3;16-24;36).  
40  
41

42 The questionnaires and the procedures of identification, assessment and inclusion  
43  
44 of patients were pilot tested prior to study start. The procedures have been described in  
45  
46 detail (26).  
47  
48  
49  
50  
51  
52  
53  
54  
55  
56  
57  
58  
59  
60

## Results

In total 955 patients fulfilled the criteria for inclusion and 486 patients were allocated to the intervention group and 469 to the control group (Figure 1). The patients were registered with 323 general practices. Patients were on average aged 63 years at baseline and 72% were female. The most frequent cancer localisations were breast (43%) and lung (15%). The intervention and control groups showed similar baseline characteristics (Table 1). For the primary outcome, Global Health Status at 6 months, we obtained data from 281 patients from 131 practices in the intervention group and 297 patients from 125 practices in the control group, in total 612 of 858 (71%) patients (95%-confidence interval for ICC 0.000 - 0.103) (Figure 1).

The intervention had no statistically significant impact on the primary or on the secondary outcomes (Tables 2 and 3). Adjustment for age and sex of the secondary outcomes showed results similar to the unadjusted analysis. Intention to treat analyses on all outcomes of the group of breast cancer patients showed no statistical differences between patients in the intervention and control group (mean difference in primary outcome of 1.77 (-3.2 to 6.8)). Per protocol analyses on all outcomes were used to analyse if the personal telephone contact to the GP was crucial. The patients receiving all elements of the intervention showed no statistically significant difference when compared to the control group (mean difference in primary outcome of -4.43 (-9.7 to 0.8)).

## Discussion

### *Principal findings*

This intervention including a hospital-based patient interview about rehabilitation, individual and general information to the GP and an encouragement to contact the patient and

1  
2  
3  
4 facilitate a process of rehabilitation did not improve quality of life or relieve psychological  
5  
6 distress of patients newly diagnosed with cancer.  
7  
8

9  
10  
11 *Strengths and weaknesses of the study*

12  
13 The study included 955 patients and the pre-study power calculation and the precision of  
14  
15 the statistical estimates indicate that the study could have detected relevant effects of the  
16  
17 intervention. The confidence interval of the difference in global health status after 6 months  
18  
19 ranged between -2.4 and 4.9 units. Clinically relevant differences have been suggested to  
20  
21 correspond to at least 8 units (34;35).  
22  
23

24 An important question is whether any spill-over effects may have improved care for  
25  
26 the patients in the control group, leading to an apparently smaller impact of the  
27  
28 intervention. Information about the study and the concept of rehabilitation was given to the  
29  
30 staff at the involved departments at Vejle Hospital during the inclusion period, but the  
31  
32 intervention was managed by the two rehabilitation coordinators without influence on the  
33  
34 care provided for the patients in the control group. The cluster randomisation was  
35  
36 performed to ensure that GPs only cared for patients in either the intervention or the  
37  
38 control group. GPs in the control group were not informed about the study and we have no  
39  
40 reason to believe that information about the study was disseminated between GPs in the  
41  
42 two groups.  
43  
44

45  
46 Another question is whether we used the most relevant outcome measures.  
47  
48 Process measures are often used to evaluate interventions. However, despite successful  
49  
50 implementation of interventions, the impact on patients' wellbeing is often sparse. Hence,  
51  
52 we deliberately chose patients' quality of life as the primary outcome. Further, the EORTC  
53  
54  
55  
56  
57  
58  
59  
60

1  
2  
3  
4 QLQ-C30 and the POMS questionnaires are both well-validated instruments to evaluate  
5  
6 change of quality of life in cancer patients and psychological distress in general (31-35).  
7

8  
9 The intervention was designed to support rehabilitation irrespective of the character  
10 of the problem, cancer type, age and sex. We included patients with various cancer types,  
11 different prognosis, health problems and needs of supportive care. The inhomogeneity of  
12 the study population might have diluted effects in groups of patients with specific problems  
13 or diagnoses. It cannot be ruled out that a similar intervention might have effect on  
14 subgroups of patients with specific cancers or special needs. However, no effect was  
15 observed when analysing the large and rather homogeneous group of breast cancer  
16 patients.  
17  
18  
19  
20  
21  
22  
23  
24  
25

26 The intervention included a personal telephone contact to the patients' GP but some  
27 GPs were not reachable (26). A priori we assumed that this personal contact could be of  
28 major importance, but per protocol analysis showed no differences in outcomes for  
29 patients where the rehabilitation coordinators managed to reach the GP by phone.  
30  
31  
32  
33  
34  
35  
36

### 37 *Relations to other studies*

38  
39 To our knowledge, only three papers have specifically evaluated the impact of GP  
40 involvement in cancer rehabilitation in a randomised design (17;36-37). A shared care  
41 programme (n=250) conducted in Denmark in 2003 included transfer of knowledge from  
42 oncologists to GPs, improved communication between parties, and active patient  
43 involvement (17). This intervention had a positive impact on patient evaluation of  
44 cooperation between primary and secondary healthcare sectors, but not on quality of life.  
45  
46  
47  
48  
49  
50  
51  
52  
53 A Norwegian study from 2005 (n=91) evaluated the effect of an invitation to a 30-minute  
54 consultation with the patient's GP, aiming at creating a closer and more frequent contact  
55  
56  
57  
58  
59  
60

1  
2  
3  
4 between patients and GPs (36). No increase in number of consultations or improvement of  
5  
6 quality of life was observed. The latest study was conducted in Sweden in 2008 (n=481)  
7  
8 and tested the effectiveness of individual support, group rehabilitation and a combination  
9  
10 of the two compared to standard care (37). The individual support included individual  
11  
12 psychological and nutritional support along with intensified primary health care, including  
13  
14 extended information about the diagnosis, education in cancer care, and supervision of the  
15  
16 patient's home care nurse and GP by a multi-professional oncology team. The Swedish  
17  
18 study did not show an improvement either in quality of life or psychological well-being  
19  
20 when compared to standard care. Further, a systematic review (38) including the three  
21  
22 studies concluded that none of the interventions improved quality of life or patient  
23  
24 wellbeing, but due to possible methodological problems further studies on the topic are  
25  
26 needed.  
27  
28  
29  
30  
31  
32

### 33 *Meaning*

34  
35 Interventions aiming to give the GP an enhanced role in cancer rehabilitation seem to have  
36  
37 difficulties improving quality of life. Furthermore, a number of papers evaluating the effect  
38  
39 of various other types of interventions aiming to improve quality of life of cancer patients  
40  
41 (39-44) have demonstrated that this may be difficult in general. To better understand the  
42  
43 intervention and the impact on GP and patient behaviour further studies will include  
44  
45 evaluation of process measures like GP proactivity, patient participation in different  
46  
47 rehabilitation activities, and GP and patient satisfaction.  
48  
49  
50

51  
52 Future studies should evaluate the importance of the organisation of cancer  
53  
54 treatment and rehabilitation. Is an unclear organisation with many partners (hospital  
55  
56 departments, GPs, municipalities and private organisations) an impediment to effective  
57  
58  
59  
60

1  
2  
3  
4 rehabilitation? A well-organised system with defined roles and easy referral to various  
5  
6 elements of rehabilitation (specialised physiotherapy, social counselling, psychological  
7  
8 advice etc.) may be of importance for the effect of a GP intervention. To improve  
9  
10 rehabilitation it may also be important to develop screening tools that support identification  
11  
12 of patients with special needs. Initiatives supporting the GPs in undertaking a proactive  
13  
14 role for patients with special needs should be considered. The effect of interventions  
15  
16 should, however, be carefully evaluated in order to ensure efficient use of resources  
17  
18 before implementation.  
19  
20  
21  
22  
23  
24  
25  
26  
27  
28  
29  
30  
31  
32  
33  
34  
35  
36  
37  
38  
39  
40  
41  
42  
43  
44  
45  
46  
47  
48  
49  
50  
51  
52  
53  
54  
55  
56  
57  
58  
59  
60

Figure 1. Study flow.

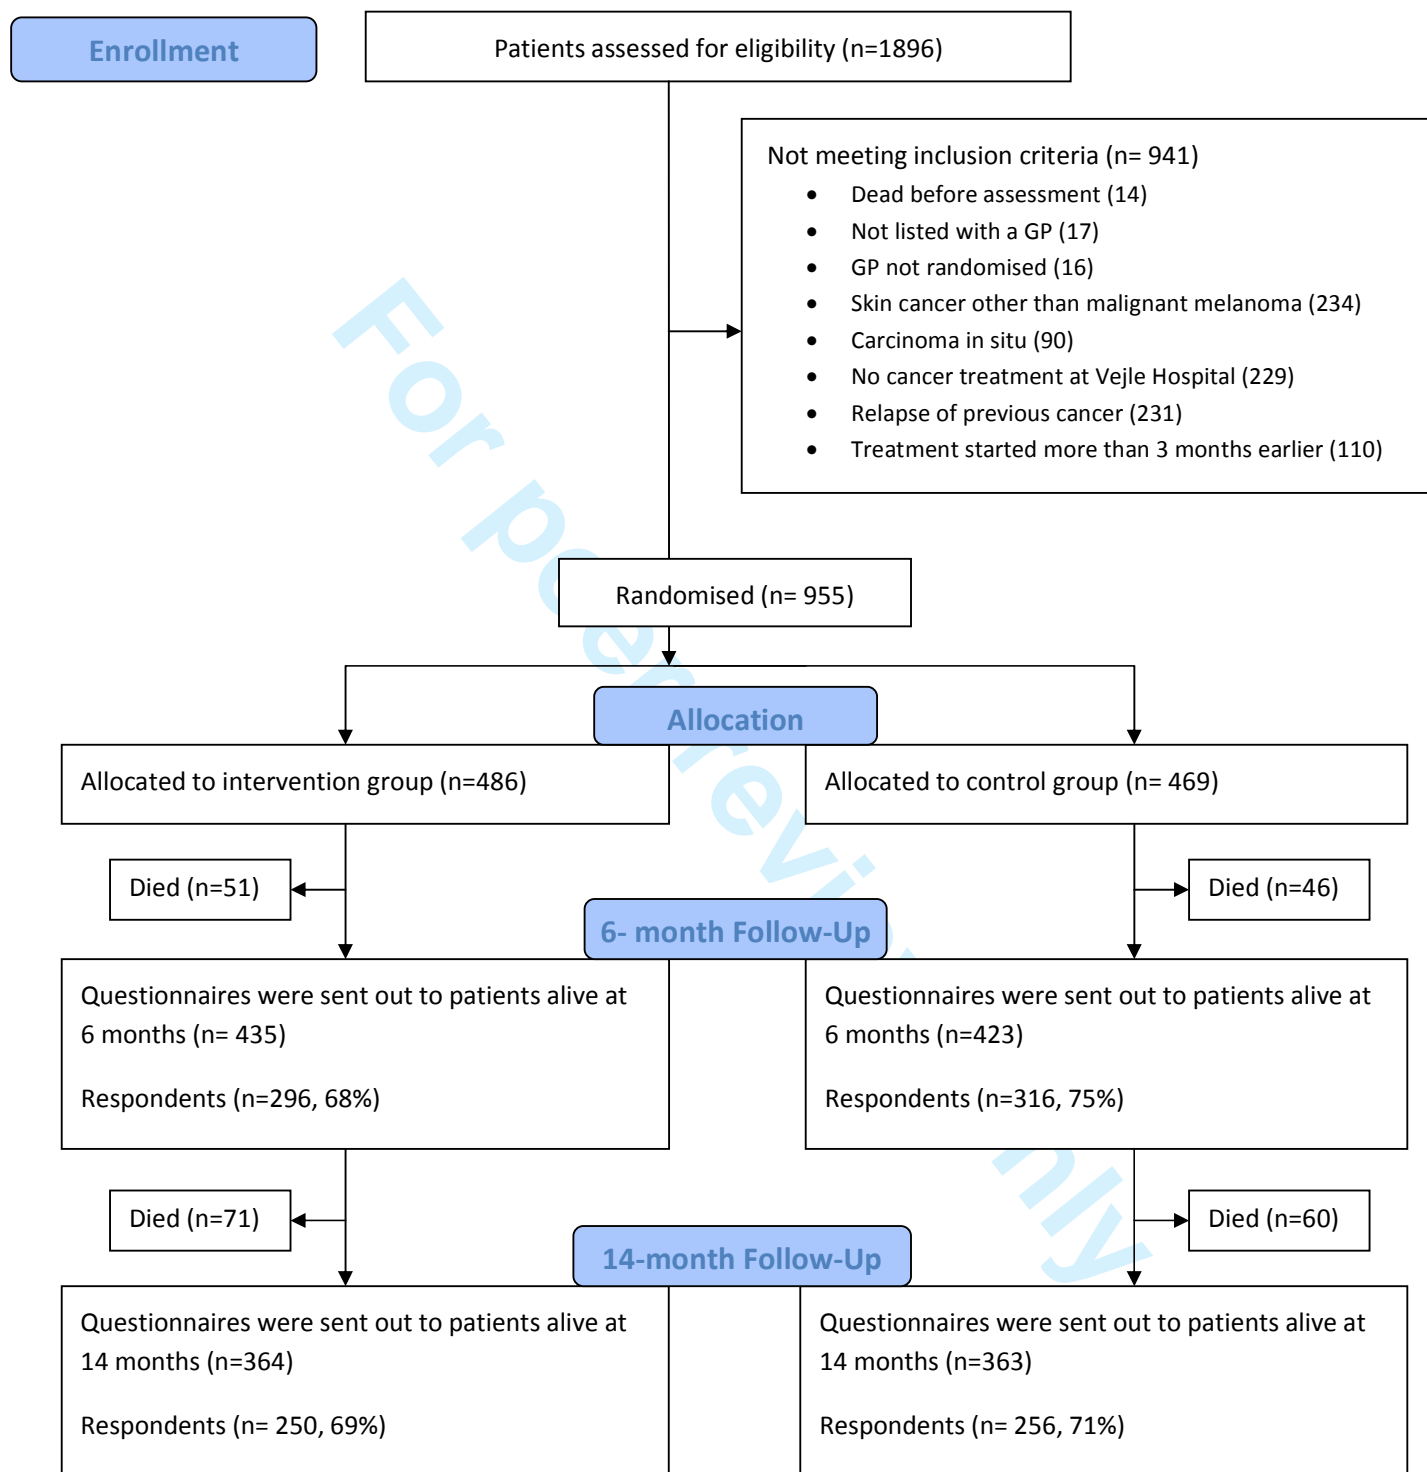



Figure 2. General needs and problems among cancer patients.

|                     |                                                                                                                                                                                                                                                                                                                                                                                                                                                                                                                                          |
|---------------------|------------------------------------------------------------------------------------------------------------------------------------------------------------------------------------------------------------------------------------------------------------------------------------------------------------------------------------------------------------------------------------------------------------------------------------------------------------------------------------------------------------------------------------------|
| Psychological level | <ul style="list-style-type: none"> <li>• Fear of death or recurrence</li> <li>• Guilt feelings about being sick</li> <li>• Anger at general practitioner or “system” for not having taken action soon enough</li> <li>• Troubles adjusting to new self-image</li> <li>• Sense of being left in limbo after discharge from the hospital</li> <li>• Risk of developing depression</li> <li>• Reconsiderations about priorities in life and how one wants to live life with or after a cancer disease</li> <li>• Sexual problems</li> </ul> |
| Social level        | <ul style="list-style-type: none"> <li>• Concerns about the well-being of spouse, children and other relatives</li> <li>• Changed body image or sexuality</li> <li>• Changed position/status in marriage, in family, at work, etc.</li> <li>• Concerns about possible infertility caused by treatment</li> <li>• Information about patient associations and similar groups for patients and relatives</li> </ul>                                                                                                                         |
| Physical level      | <ul style="list-style-type: none"> <li>• Physical capacity according to daily activities, need for special facilities, homecare, conversions of the home, etc.</li> <li>• Need for dietary advice, e.g. to prevent undue weight loss</li> <li>• Support in order to accept physical changes and late complications like tiredness, amputation, infertility, pain, etc.</li> </ul>                                                                                                                                                        |
| Work-related level  | <ul style="list-style-type: none"> <li>• Concerns about losing one's job</li> <li>• Concerns about having to give up one's former responsibilities or change field of work due to reduced ability to work</li> <li>• Opportunities for financial support during sick-leave, flexible job, etc.</li> <li>• Support to keep in contact with workplace during sick-leave</li> </ul>                                                                                                                                                         |
| Financial level     | <ul style="list-style-type: none"> <li>• Social rights like mileage allowances, reimbursement of assistive technology, etc.</li> <li>• Concerns about a decrease in income and consequences hereof in relation to housing, spouse, children, etc.</li> <li>• Conditions regarding pension or incapacity benefit</li> </ul>                                                                                                                                                                                                               |

Table 1. Baseline demographic and medical characteristics for all included patients (n=955).

| <b>Demographic characteristics</b> | Control group<br>(n=469) | Intervention group<br>(n=486) |
|------------------------------------|--------------------------|-------------------------------|
| Age, years                         |                          |                               |
| Mean (CI)                          | 63.6 (62.5 to 64.6)      | 63.2 (62.2 to 64.3)           |
| Median                             | 64                       | 64                            |
| Range                              | 21 to 98                 | 28 to 92                      |
| Sex                                |                          |                               |
| Male (%)                           | 134 (28.6)               | 133 (27.4)                    |
| Female (%)                         | 335 (71.4)               | 353 (72.6)                    |
| <b>Cancer type</b>                 | Numbers (%)              | Numbers (%)                   |
| Cancer of breast                   | 206 (43.9)               | 201 (41.4)                    |
| Cancer of lung                     | 69 (14.7)                | 75 (15.4)                     |
| Malignant melanoma                 | 44 (9.4)                 | 35 (7.2)                      |
| Cancer of rectum/anus              | 33 (7.0)                 | 45 (9.3)                      |
| Cancer of colon                    | 29 (6.2)                 | 39 (8.0)                      |
| Cancer of ovaries                  | 12 (2.6)                 | 9 (1.9)                       |
| Cancer of biliary system           | 7 (1.5)                  | 8 (1.6)                       |
| Cancer of brain                    | 6 (1.3)                  | 8 (1.6)                       |
| Cancer of prostate                 | 8 (1.7)                  | 3 (0.6)                       |
| Cancer of corpus uteri             | 6 (1.3)                  | 5 (1.0)                       |
| Myelomatosis                       | 6 (1.3)                  | 5 (1.0)                       |
| Lymphoma                           | 3 (0.6)                  | 4 (0.8)                       |
| Unspecified location               | 16 (3.4)                 | 16 (3.3)                      |
| Other diagnoses                    | 24 (5.1)                 | 33 (6.8)                      |

Table 2. Health-Related Quality of Life (EORTC QLQ-C30) outcome variables and mean differences at 6 and 14 months (95% confidence intervals).

| Outcome variable         | 6 months |                     |                          |      | 14 months |                     |                          |      |
|--------------------------|----------|---------------------|--------------------------|------|-----------|---------------------|--------------------------|------|
|                          | n        | Mean (CI)           | Mean difference (95% CI) | P    | n         | Mean (CI)           | Mean difference (95% CI) | P    |
| Global Health Status/qol |          |                     |                          |      |           |                     |                          |      |
| Control group            | 297      | 68.0 (65.5 to 70.5) |                          |      | 246       | 72.8 (70.3 to 75.3) |                          |      |
| Intervention group       | 281      | 69.3 (66.7 to 71.9) | 1.25 (-2.4 to 4.9)       | 0.50 | 240       | 72.1 (69.6 to 74.7) | -0.71 (-4.3 to 2.8)      | 0.69 |
| Physical functioning     |          |                     |                          |      |           |                     |                          |      |
| Control group            | 294      | 79.0 (76.4 to 81.5) |                          |      | 240       | 81.9 (79.3 to 84.5) |                          |      |
| Intervention group       | 280      | 79.7(77.1 to 82.4)  | 0.77 (-2.9 to 4.4)       | 0.68 | 234       | 82.0 (79.4 to 84.6) | -0.08 (-3.6 to 3.8)      | 0.97 |
| Role functioning         |          |                     |                          |      |           |                     |                          |      |
| Control group            | 291      | 71.3 (67.7 to 74.9) |                          |      | 239       | 78.0 (74.4 to 81.7) |                          |      |
| Intervention group       | 277      | 72.5 (68.8 to 76.1) | 1.18 (-3.9 to 6.3)       | 0.65 | 235       | 78.8 (75.0 to 82.5) | 0.70 (-4.5 to 5.9)       | 0.79 |
| Emotional functioning    |          |                     |                          |      |           |                     |                          |      |
| Control group            | 293      | 80.5 (78.1 to 83.0) |                          |      | 240       | 80.7 (77.9 to 83.4) |                          |      |
| Intervention group       | 278      | 81.6 (79.1 to 84.1) | 1.02 (-2.5 to 4.5)       | 0.57 | 238       | 80.8 (78.0 to 83.6) | 0.12 (-3.8 to 4.1)       | 0.95 |
| Cognitive functioning    |          |                     |                          |      |           |                     |                          |      |
| Control group            | 290      | 83.0 (80.5 to 85.5) |                          |      | 245       | 82.6 (79.7 to 85.5) |                          |      |
| Intervention group       | 278      | 83.9 (81.3 to 86.4) | 0.88 (-2.7 to 4.5)       | 0.63 | 238       | 85.1 (82.1 to 88.2) | 2.53 (-1.7 to 6.7)       | 0.24 |
| Social functioning       |          |                     |                          |      |           |                     |                          |      |
| Control group            | 295      | 85.7 (83.0 to 88.4) |                          |      | 242       | 88.2 (85.4 to 91.0) |                          |      |
| Intervention group       | 280      | 86.0 (83.2 to 88.8) | 0.28 (-3.6 to 4.2)       | 0.89 | 238       | 87.4 (84.6 to 90.3) | -0.77 (-4.8 to 3.2)      | 0.71 |
| Fatigue                  |          |                     |                          |      |           |                     |                          |      |
| Control group            | 292      | 37.4 (34.3 to 40.6) |                          |      | 244       | 32.1 (28.8 to 35.3) |                          |      |
| Intervention group       | 279      | 34.2 (30.9 to 37.4) | -3.27 (-7.8 to 1.3)      | 0.16 | 234       | 32.3 (28.9 to 35.6) | 0.23 (-4.5 to 4.9)       | 0.92 |
| Nausea and vomiting      |          |                     |                          |      |           |                     |                          |      |
| Control group            | 300      | 8.1 (6.1 to 10.0)   |                          |      | 244       | 5.5 (3.9 to 7.2)    |                          |      |
| Intervention group       | 284      | 8.0 (6.0 to 10.0)   | -0.11 (-2.9 to 2.7)      | 0.94 | 236       | 5.6 (3.9 to 7.3)    | 0.05 (-2.3 to 2.4)       | 0.97 |
| Pain                     |          |                     |                          |      |           |                     |                          |      |
| Control group            | 283      | 23.0 (19.8 to 26.2) |                          |      | 241       | 21.9 (18.5 to 25.4) |                          |      |
| Intervention group       | 274      | 22.0 (18.8 to 25.3) | -0.95 (-5.5 to 3.6)      | 0.68 | 234       | 21.4 (17.8 to 24.9) | -0.56 (-5.5 to 4.4)      | 0.83 |
| Dyspnoea                 |          |                     |                          |      |           |                     |                          |      |
| Control group            | 297      | 17.0 (13.9 to 20.2) |                          |      | 245       | 13.2 (10.0 to 16.5) |                          |      |
| Intervention group       | 286      | 17.9 (14.7 to 21.2) | 0.87 (-3.6 to 5.4)       | 0.71 | 233       | 15.4 (11.9 to 18.8) | 2.11 (-2.6 to 6.8)       | 0.38 |
| Insomnia                 |          |                     |                          |      |           |                     |                          |      |
| Control group            | 302      | 27.5 (24.0 to 31.0) |                          |      | 248       | 29.6 (25.6 to 33.6) |                          |      |
| Intervention group       | 285      | 27.3 (23.6 to 30.9) | -0.23 (-5.3 to 4.8)      | 0.93 | 240       | 28.5 (24.4 to 32.6) | -1.08 (-6.8 to 4.6)      | 0.71 |
| Appetite loss            |          |                     |                          |      |           |                     |                          |      |
| Control group            | 301      | 14.1 (11.0 to 17.2) |                          |      | 246       | 9.6 (7.1 to 12.2)   |                          |      |
| Intervention group       | 288      | 15.9 (12.7 to 19.0) | 1.79 (-2.7 to 6.2)       | 0.43 | 239       | 7.9 (5.4 to 10.5)   | -1.67 (-5.3 to 2.0)      | 0.37 |
| Constipation             |          |                     |                          |      |           |                     |                          |      |
| Control group            | 299      | 12.6 (9.7 to 15.5)  |                          |      | 248       | 11.9 (9.0 to 14.9)  |                          |      |
| Intervention group       | 284      | 11.3 (8.3 to 14.2)  | -1.33 (-5.4 to 2.8)      | 0.53 | 236       | 8.9 (5.9 to 11.9)   | -3.03 (-7.4 to 1.1)      | 0.16 |
| Diarrhoea                |          |                     |                          |      |           |                     |                          |      |
| Control group            | 299      | 11.3 (8.8 to 13.9)  |                          |      | 250       | 11.4 (8.5 to 14.2)  |                          |      |
| Intervention group       | 284      | 11.4 (8.8 to 14.1)  | 0.08 (-3.6 to 3.8)       | 0.97 | 238       | 10.0 (7.0 to 13.0)  | -1.38 (-5.5 to 2.8)      | 0.51 |
| Financial difficulties   |          |                     |                          |      |           |                     |                          |      |
| Control group            | 297      | 7.6 (5.4 to 9.8)    |                          |      | 242       | 6.5 (3.9 to 9.0)    |                          |      |
| Intervention group       | 284      | 8.0 (5.7 to 10.2)   | 0.34 (-2.8 to 3.5)       | 0.83 | 236       | 6.7 (4.1 to 9.4)    | 0.27 (-3.4 to 4.0)       | 0.89 |

Mean values from 0 to 100. A score of 100 indicates optimal function or maximum symptom intensity (i.e. for functional measures, an increase indicates improvement, while for symptoms, an increase indicates worsening)

Table 3. Psychological distress (POMS) at 14 months and mean differences between groups (95 confidence intervals).

| Outcome variable       | n   | Mean range | Mean (95% CI)         | Mean difference (95% CI) | P    |
|------------------------|-----|------------|-----------------------|--------------------------|------|
| Anger/hostility        |     | 0 to 28    |                       |                          |      |
| Control group          | 223 |            | 2.03 (1.59 to 2.48)   |                          |      |
| Intervention group     | 230 |            | 1.88 (1.43 to 2.33)   | -0.15 (-0.79 to 0.48)    | 0.64 |
| Confusion/bewilderment |     | 0 to 20    |                       |                          |      |
| Control group          | 229 |            | 2.45 (2.04 to 2.86)   |                          |      |
| Intervention group     | 231 |            | 2.11 (1.69 to 2.53)   | -0.34 (-0.92 to 0.25)    | 0.26 |
| Depression/dejection   |     | 0 to 32    |                       |                          |      |
| Control group          | 223 |            | 3.85 (3.20 to 4.51)   |                          |      |
| Intervention group     | 229 |            | 3.26 (2.61 to 3.92)   | -0.59 (-1.52 to 0.34)    | 0.21 |
| Fatigue/inertia        |     | 0 to 20    |                       |                          |      |
| Control group          | 226 |            | 4.65 (4.08 to 5.22)   |                          |      |
| Intervention group     | 234 |            | 4.14 (3.02 to 4.10)   | -0.51 (-1.32 to 0.29)    | 0.21 |
| Tension/anxiety        |     | 0 to 24    |                       |                          |      |
| Control group          | 226 |            | 3.82 (3.28 to 4.36)   |                          |      |
| Intervention group     | 233 |            | 3.56 (3.02 to 4.10)   | -0.26 (-1.02 to 0.50)    | 0.50 |
| Vigour/activity        |     | 0 to 24    |                       |                          |      |
| Control group          | 218 |            | 10.28 (9.51 to 11.05) |                          |      |
| Intervention group     | 228 |            | 10.09 (9.31 to 10.86) | -0.20 (-1.29 to 0.89)    | 0.72 |
| Total mood disturbance |     | 0 to 124   |                       |                          |      |
| Control group          | 200 |            | 4.87 (2.29 to 7.45)   |                          |      |
| Intervention group     | 210 |            | 4.19 (1.62 to 6.76)   | -0.68 (-4.32 to 2.97)    | 0.72 |

Mean values of each subscale depends on the number of items related to the individual subscale which varies from 5 to 8, each item ranging from 0 to 4. Total mood disturbance is calculated by summing up the scores on the five negative symptom subscales and subtracting the score on the one positively scored subscale, vigour/activity. A higher score indicates a higher degree of symptoms/feelings within the related subscale.

## Contributors

SHB, JK, JS and DGH contributed to conception and study design. SHB, DGH, JK and JS obtained the funding. SHB, JK, JS and DGH wrote the protocol. SHB and DGH were responsible for recruitment of patients. SHB collected and managed the data. PVL was the study statistician. SHB and PVL performed the statistical analysis. SHB, PVL, JK, JS and DGH contributed to the interpretation of data. SHB drafted the first version of the manuscript. SHB, JK, JS, PVL and DGH critically reviewed, revised, and supplemented the manuscript. All authors approved the final version. SHB is the guarantor.

## Licence for publication

The Corresponding Author has the right to grant on behalf of all authors and does grant on behalf of all authors, an exclusive licence (or non exclusive for government employees) on a worldwide basis to the BMJ Publishing Group Ltd and its licensees, to permit this article (if accepted) to be published in BMJ editions and any other BMJPG products and to exploit all subsidiary rights, as set out in our licence (<http://resources.bmj.com/bmj/authors/checklists-forms/licence-for-publication>).

## Funding

This study was funded by the Danish Cancer Society, the Novo Nordisk Foundation and the Region of Southern Denmark. The National Research Center for Cancer Rehabilitation is funded by the Danish Cancer Society. The authors' work was independent from the funders.

## Competing interests

All authors have completed the ICMJE uniform disclosure form at [www.icmje.org/coi\\_disclosure.pdf](http://www.icmje.org/coi_disclosure.pdf) and declare: no support from any organisation for the submitted

21 Enhanced involvement of general practitioners in cancer rehabilitation: a RCT, December 2011, Stinne Holm Bergholdt work; no financial relationships with any organisations that might have an interest in the submitted work in the previous 3 years; no other relationships or activities that could appear to have influenced the submitted work.

### **Ethical approval**

The study was approved by the Danish Data Protection Agency. The Regional Committee on Biomedical Research Ethics evaluated the project and concluded that the intervention did not need an approval from the Danish National Committee on Biomedical Research Ethics according to Danish law (Project-ID: S-20082000-7).

### **Data**

All authors had full access to all of the data in the study and can take responsibility for the integrity of the data and the accuracy of the data analysis.

### **Data sharing**

No additional data available.

### **Acknowledgement**

The authors wish to thank all patients and health care professionals who took part in the study. We also wish to thank Lise Keller Stark, Research Unit of General Practice, University of Southern Denmark, for proofreading the manuscript and Susanne Døssing Berntsen for managing datasets.

## References

- (1) Mikkelsen TH, Sondergaard J, Jensen AB, Olesen F. Cancer rehabilitation: psychosocial rehabilitation needs after discharge from hospital? *Scand J Prim Health Care* 2008;26:216-21.
- (2) Hewitt M, Greenfield S, Stovall E. *From Cancer Patient to Cancer Survivor: Lost in Transition*. The National Academies Press, Washington, D.C.: Committee on Cancer Survivorship. Improving Care and Quality of Life, National Cancer Policy Board, Institute of Medicine, and National Research Council; 2006.
- (3) Groenvold M, Pedersen C, Jensen CR, Faber MT, Johnsen AT. *The cancer patient's world-an investigation of the problems experienced by Danish cancer patients*. Danish Cancer Society, Copenhagen 2006 [in Danish].
- (4) Schmid-Buchi S, Halfens RJ, Dassen T, van den Borne B. Psychosocial problems and needs of posttreatment patients with breast cancer and their relatives. *Eur J Oncol Nurs* 2010; Jan 18. DOI:10.1016/j.ejon.2009.11.001.
- (5) Steele R, Fitch MI. Supportive care needs of patients with lung cancer. *Can Oncol Nurs J* 2010;20(1):15-22.
- (6) Steele R, Fitch MI. Supportive care needs of women with gynaecological cancer. *Cancer Nurs* 2008;31:284-91.
- (7) Armes J, Crowe M, Colbourne L, Morgan H, Murrels T, Oakley C, Palmer N, Ream E, Young A, Richardson A. Patients' supportive care needs beyond the end of cancer treatment: a prospective, longitudinal survey. *J Clin Oncol* 2009;27:6172-9.
- (8) McDowell ME, Occhipinti S, Ferguson M, Dunn J, Chambers SK. Predictors of change in unmet supportive care needs in cancer. *Psycho-Oncology* 2010;19:508-16.
- (9) World Health Organisation [internet] at <http://www.who.int/topics/rehabilitation/en>. Accessed on November 18, 2011.

- 23 Enhanced involvement of general practitioners in cancer rehabilitation: a RCT, December 2011, Stinne Holm Bergholdt
- 1 (10) Jones R, Regan M, Ristevski E, Breen S. Patients' perception of communication with  
2 clinicians during screening and discussion of cancer supportive care needs. Patient Educ  
3 Couns 2011. Jan 18. DOI: 10.1016/j.pec.2010.12.006.  
4
  - 5 (11) Earle CC. Failing to plan is planning to fail: improving the quality of care with survivorship  
6 care plans. J Clin Oncol 2006;24:5112-6.  
7
  - 8 (12) Gilbert SM, Miller DC, Hollenbeck BK, Montie JE, Wei JT. Cancer survivorship: challenges  
9 and changing paradigms. J Urol 2008;179:431-8.  
10
  - 11 (13) Houlihan NG. Transitioning to cancer survivorship: plans of care. Oncology 2009;23(8  
12 Suppl):42-8.  
13
  - 14 (14) Olesen F, Dickinson J, Hjortdahl P. General practice- time for a new definition. BMJ  
15 2000;320:354-7.  
16
  - 17 (15) Grunfeld E, Earle CC. The interface between primary and oncology specialty care:  
18 Treatment through survivorship. J Natl Cancer Inst Monogr 2010;2010(40):25-30.  
19
  - 20 (16) Smith SM, Allwright S, O'Dowd T. Does sharing care across the primary-specialty interface  
21 improve outcomes in chronic disease? A systematic review. Am J Manag Care  
22 2008;14:213-24.  
23
  - 24 (17) Nielsen JD, Palshof T, Mainz J, Jensen AB, Olesen F. Randomised controlled trial of a  
25 shared care programme for newly referred cancer patients: bridging the gap between  
26 general practice and hospital. Qual Saf Health Care 2003;12:263-72.  
27
  - 28 (18) Grunfeld E. Primary care physicians and oncologists are players on the same team. J Clin  
29 Oncol 2008;26:2246-7.  
30
  - 31 (19) Grunfeld E. Cancer survivorship: a challenge for primary care physicians. Br J Gen Pract  
32 2005;55:741-2.  
33
  - 34 (20) Johansson B, Berglund G, Hoffman K, Glimelius B, Sjoden PO. The role of the general  
35 practitioner in cancer care and the effect of an extended information routine. Scand J Prim  
36 Health Care 2000;18:143-8.  
37  
38  
39  
40  
41  
42  
43  
44  
45  
46  
47  
48  
49  
50  
51  
52  
53  
54  
55  
56  
57  
58  
59  
60



- 24 Enhanced involvement of general practitioners in cancer rehabilitation: a RCT, December 2011, Stinne Holm Bergholdt
- (21) Kendall M, Boyd K, Campbell C, Cormie P, Fife S, Thomas K, et al. How do people with cancer wish to be cared for in primary care? Serial discussion groups of patients and carers. *Fam Pract* 2006;23:644-50.
  - (22) Anvik T, Holtedahl KA, Mikalsen H. "When patients have cancer, they stop seeing me"--the role of the general practitioner in early follow-up of patients with cancer--a qualitative study. *BMC Fam Pract* 2006;7:19.
  - (23) Bulsara C, Ward AM, Joske D. Patient perceptions of the GP role in cancer management. *Aust Fam Physician* 2005;34:299-300,302.
  - (24) Mikkelsen TH. PhD-thesis: Cancer rehabilitation in Denmark – with particular focus on the present and future role of general practice. Faculty of Health Sciences, University of Aarhus, Denmark, 2009. ISBN 978-87-90004-09-5.
  - (25) Kendall M, Boyd K, Campbell C, Cormie P, Fife S, Thomas K, et al. How do people with cancer wish to be cared for in primary care? Serial discussion groups of patients and carers. *Fam Pract* 2006;23:644-50.
  - (26) Hansen DG, Bergholdt SH, Holm L, Kragstrup J, Bladt T, Søndergaard J. A complex intervention to enhance the involvement of general practitioners in cancer rehabilitation. Protocol for a randomised controlled trial and feasibility study of a multimodal intervention. *Acta Oncol* 2011;50:299-306.
  - (27) Source: [www.regionsyddanmark.dk](http://www.regionsyddanmark.dk); 2009.
  - (28) PLO Praksistælling [General Practitioners' Organisation Practice Count] Copenhagen, 2009.
  - (29) Kurtz SM, Silverman JD. The Calgary-Cambridge Referenced Observation Guides: an aid to defining the curriculum and organizing the teaching in communication training programmes. *Med Educ* 1996;30:83-9.
  - (30) Mikkelsen T, Søndergaard J, Sokolowski I, Jensen A, Olesen F. Cancer survivors' rehabilitation needs in a primary health care context. *Fam Pract* 2009;26:221-30.

- 25 Enhanced involvement of general practitioners in cancer rehabilitation: a RCT, December 2011, Stinne Holm Bergholdt
- 1  
2  
3  
4  
5  
6  
7  
8  
9  
10  
11  
12  
13  
14  
15  
16  
17  
18  
19  
20  
21  
22  
23  
24  
25  
26  
27  
28  
29  
30  
31  
32  
33  
34  
35  
36  
37  
38  
39  
40  
41  
42  
43  
44  
45  
46  
47  
48  
49  
50  
51  
52  
53  
54  
55  
56  
57  
58  
59  
60
- (31) Aaronson NK, Ahmedzai S, Bergman B, Bullinger M, Cull A, Duez NJ, et al. The European Organization for Research and Treatment of Cancer QLQ-C30: a quality-of-life instrument for use in international clinical trials in oncology. *J Natl Cancer Inst* 1993;85:365-76.
- (32) Groenvold M, Klee MC, Sprangers MA, Aaronson NK. Validation of the EORTC QLQ-C30 quality of life questionnaire through combined qualitative and quantitative assessment of patient-observer agreement. *J Clin Epidemiol* 1997;50:441-50.
- (33) Baker F, Denniston M, Zabora J, Polland A, Dudley WN. A POMS short form for cancer patients: psychometric and structural evaluation. *Psycho-Oncology* 2002;11:273-81.
- (34) Scott NW, Fayers PM, Aaronson NK, Bottomley A, de Graeff A, Groenvold M, Gundy C, Koller M, Petersen MA, Sprangers MAG. EORTC QLQ-C30 Reference Values Manual. EORTC Quality of Life Group 2008.
- (35) Cocks K, King MT, Velikova G, St-James MM, Fayers P, Brown J. Evidence-based guidelines for determination of sample size and interpretation of the European Organisation for the Research and Treatment of cancer Quality of Life Questionnaire Core 30. *J Clin Oncol* 2010;29:89-96. DOI: 10.1200/JCO.2010.28.0107.
- (36) Holtedal K, Norum J, Anvik T, Richardsen E. Do cancer patients benefit from short-term contact with a general practitioner following cancer treatment? A randomised, controlled study. *Support Care Cancer* 2005;13:949-956.
- (37) Johansson B, Brandberg Y, Hellbom M, Persson C, Petersson LM, Berglund G, Glimelius B. Health-related quality of life and distress in cancer patients: results from a large randomised study. *Br J Cancer* 2008;99:1975-83.
- (38) Lewis RA, Neal RD, Williams NH, France B, Hendry M, Russell D, Hughes DA, Russell I, Stuart NS, Weller D, Wilkinson C. Follow-up of cancer in primary care versus secondary care: systematic review. *Br J Gen Pract* 2009 Jul;59(564):e234-47.
- (39) Aranda S, Schofield P, Weih L, Milne D, Yates P, Faulkner R. Meeting the support and information needs of women with advanced breast cancer: a randomised controlled trial. *Br J Cancer* 2006;95:667-73.

- 26 Enhanced involvement of general practitioners in cancer rehabilitation: a RCT, December 2011, Stinne Holm Bergholdt
- 1  
2  
3  
4  
5  
6  
7  
8  
9  
10  
11  
12  
13  
14  
15  
16  
17  
18  
19  
20  
21  
22  
23  
24  
25  
26  
27  
28  
29  
30  
31  
32  
33  
34  
35  
36  
37  
38  
39  
40  
41  
42  
43  
44  
45  
46  
47  
48  
49  
50  
51  
52  
53  
54  
55  
56  
57  
58  
59  
60
- (40) Rottmann N, Dalton SO, Bidstrup PE, Würtzen H, Høybye MT, Ross L, Christensen J, Frederiksen K, Hansen DG, Johansen C. No improvement in distress and quality of life following psychosocial cancer rehabilitation. A randomised trial. *Psycho-Oncology* 2011;Feb. 8. DOI: 10.1002/pon.1924.
- (41) Ross L, Boesen EH, Dalton SO, Johansen C. Mind and cancer: does psychosocial intervention improve survival and psychological well-being? *Eur J Cancer* 2002;38;1447-57.
- (42) Fors EA, Bertheussen GF, Thune I, Juvet LK, Elvsaa IK, Oldervoll L, Anker G, Falkmer U, Lundgren S, Leivseth G. Psychosocial interventions as part of breast cancer rehabilitation programs? Results from a systematic review. *Psycho-Oncology* 2010; Sep 6. DOI: 10.1002/pon.1844
- (43) Newell SA, Sanson-Fisher RW, Savolainen NJ. Systematic review of psychological therapies for cancer Patients: overview and recommendations for future research. *J Natl Cancer Inst* 2002;94:558-84.
- (44) Uitterhoeve RJ, Vernooij M, Litjens M, Potting K, Bensing J, De Mulder P, Achterberg T van. Psychosocial interventions for patients with advanced cancer- a systematic review of the literature. *Br J Cancer* 2004;91:1050-62.

## Checklist of items to include when reporting a cluster randomised trial

| * = addition to CONSORT <i>Modifications to checklist in italics</i> |      |                                                                                                                                                                                                                                                                                                                                                                                                  |                      |
|----------------------------------------------------------------------|------|--------------------------------------------------------------------------------------------------------------------------------------------------------------------------------------------------------------------------------------------------------------------------------------------------------------------------------------------------------------------------------------------------|----------------------|
| PAPER SECTION and topic                                              | Item | Descriptor                                                                                                                                                                                                                                                                                                                                                                                       | Reported on Page No. |
| <i>TITLE &amp; ABSTRACT</i>                                          | 1*   | How participants were allocated to interventions (e.g., “random allocation”, “randomised”, or “randomly assigned”), <i>specifying that allocation was based on clusters</i>                                                                                                                                                                                                                      | 2                    |
| <i>INTRODUCTION</i><br>Background                                    | 2*   | Scientific background and explanation of rationale, <i>including the rationale for using a cluster design.</i>                                                                                                                                                                                                                                                                                   | 4+8                  |
| <i>METHODS</i><br>Participants                                       | 3*   | Eligibility criteria for participants <i>and clusters</i> and the settings and locations where the data were collected.                                                                                                                                                                                                                                                                          | 5                    |
| Interventions                                                        | 4*   | Precise details of the interventions intended for each group, <i>whether they pertain to the individual level, the cluster level or both</i> , and how and when they were actually administered.                                                                                                                                                                                                 | 6-7                  |
| Objectives                                                           | 5*   | Specific objectives and hypotheses, <i>and whether they pertain to the individual level, the cluster level or both.</i>                                                                                                                                                                                                                                                                          | 4                    |
| Outcomes                                                             | 6*   | Report clearly defined primary and secondary outcome measures, <i>whether they pertain to the individual level, the cluster level or both</i> , and, when applicable, any methods used to enhance the quality of measurements (e.g., multiple observations, training of assessors).                                                                                                              | 7                    |
| Sample size                                                          | 7*   | How <i>total</i> sample size was determined ( <i>including method of calculation, number of clusters, cluster size, a coefficient of intracluster correlation (ICC or k), and an indication of its uncertainty</i> ) and, when applicable, explanation of any interim analyses and stopping rules.                                                                                               | 8                    |
| Randomisation.<br>Sequence generation                                | 8*   | Method used to generate the random allocation sequence, including details of any restriction (e.g., blocking, stratification, <i>matching</i> ).                                                                                                                                                                                                                                                 | 5+8                  |
| Allocation concealment                                               | 9*   | Method used to implement the random allocation sequence, <i>specifying that allocation was based on clusters rather than individuals and clarifying whether the sequence was concealed until interventions were assigned.</i>                                                                                                                                                                    |                      |
| Implementation                                                       | 10   | Who generated the allocation sequence, who enrolled participants, and who assigned participants to their groups.                                                                                                                                                                                                                                                                                 |                      |
| Blinding (Masking)                                                   | 11   | Whether or not participants, those administering the interventions, and those assessing the outcomes were blinded to group assignment. If done, how the success of blinding was evaluated.                                                                                                                                                                                                       | 8-9                  |
| Statistical methods                                                  | 12*  | Statistical methods used to compare groups for primary outcome(s) <i>indicating how clustering was taken into account</i> ; methods for additional analyses, such as subgroup analyses and adjusted analyses.                                                                                                                                                                                    | 9                    |
| <i>RESULTS</i><br>Participant flow                                   | 13*  | Flow of <i>clusters and</i> individual participants through each stage (a diagram is strongly recommended). Specifically, for each group report the numbers of <i>clusters and</i> participants randomly assigned, receiving intended treatment, completing the study protocol, and analyzed for the primary outcome. Describe protocol deviations from study as planned, together with reasons. | 10+15 (Figure 1)     |
| Recruitment                                                          | 14   | Dates defining the periods of recruitment and follow-up.                                                                                                                                                                                                                                                                                                                                         | 5+15 (Figure 1)      |
| Baseline data                                                        | 15*  | Baseline information for each group <i>for the individual and cluster levels as applicable</i>                                                                                                                                                                                                                                                                                                   | 17 (Table 1)         |
| Numbers analyzed                                                     | 16*  | Number of <i>clusters and</i> participants (denominator) in each group included in each analysis and whether the analysis was by “intention-to-treat”. State the results in absolute numbers when feasible (e.g., 10/20, not 50%).                                                                                                                                                               | 10                   |
| Outcomes and Estimation                                              | 17*  | For each primary and secondary outcome, a summary of results for each group measures <i>for the individual or cluster level as applicable</i> , and the estimated effect size and its precision (e.g., 95% confidence interval) <i>and a coefficient of intracluster correlation (ICC or k) for each primary outcome.</i>                                                                        | 10+18-19 (Table 2+3) |
| Ancillary analyses                                                   | 18   | Address multiplicity by reporting any other analyses performed,                                                                                                                                                                                                                                                                                                                                  | 10                   |

|                                     |     |                                                                                                                                                                                      |       |
|-------------------------------------|-----|--------------------------------------------------------------------------------------------------------------------------------------------------------------------------------------|-------|
|                                     |     | including subgroup analyses and adjusted analyses, indicating those pre-specified and those exploratory.                                                                             |       |
| Adverse events                      | 19  | All important adverse events or side effects in each intervention group.                                                                                                             | None  |
| <i>DISCUSSION</i><br>Interpretation | 20  | Interpretation of the results, taking into account study hypotheses, sources of potential bias or imprecision and the dangers associated with multiplicity of analyses and outcomes. | 10-12 |
| Generalisability                    | 21* | Generalisability (external validity) <i>to individuals and/or clusters (as relevant)</i> of the trial findings.                                                                      | 12-13 |
| Overall evidence                    | 22  | General interpretation of the results in the context of current evidence.                                                                                                            | 13-14 |

For peer review only

1  
2  
3  
4  
5  
6  
7 **Enhanced involvement of general practitioners in cancer**  
8 **rehabilitation: a randomised controlled trial.**  
9

10  
11  
12  
13  
14  
15  
16  
17  
18  
19 Stinne Holm Bergholdt, MD, PhD fellow<sup>1§</sup>, Pia Veldt Larsen, statistician<sup>1</sup>, Jakob Kragstrup,  
20 professor<sup>1</sup>, Jens Søndergaard, professor<sup>1</sup>, Dorte Gilså Hansen, assistant professor<sup>1</sup>  
21  
22  
23

24  
25  
26  
27  
28 <sup>1</sup> National Research Centre for Cancer Rehabilitation, Research Unit of General Practice,  
29 University of Southern Denmark, J. B. Winsløvs Vej 9B, 5000 Odense C, Denmark  
30  
31

32  
33 § Correspondence to:  
34

35  
36 SH Bergholdt, sbergholdt@health.sdu.dk  
37

38  
39 Keywords: Cancer, rehabilitation, general practice, quality of life, general practitioners  
40  
41

42 Words: 2531  
43  
44  
45  
46  
47  
48  
49  
50  
51  
52  
53  
54  
55  
56  
57  
58  
59  
60

## Abstract

Objective: To test the hypothesis that a multimodal intervention giving the general practitioner (GP) an enhanced role in cancer rehabilitation improves patients' health-related quality of life and psychological distress.

Design: Cluster randomised controlled trial. All general practices in Denmark were randomised to an intervention group or to a control group. Patients were subsequently allocated to intervention or control (usual procedures) based on the randomisation status of their GP.

Setting: All clinical departments at a public regional hospital treating cancer patients and all general practices in Denmark.

Participants: Adult patients treated for incident cancer at Vejle Hospital, Denmark, between 12 May 2008 and 28 February 2009. A total of 955 patients (486 to intervention, 469 to control group) registered with 323 general practices were included.

Intervention: The intervention included an interview about rehabilitation needs with a rehabilitation coordinator at the regional hospital, information from the hospital to the GP about individual needs for rehabilitation and an encouragement of the GP to contact the patient to offer his support with rehabilitation.

Main outcome measures: The primary outcome was health-related quality of life measured 6 months after inclusion using the European Organisation for the Research and Treatment of Cancer Quality of Life Questionnaire Core 30 (EORTC QLQ-C30). Secondary outcomes included quality of life at 14 months and additional subscales of the EORTC QLQ-C30 at 6 and 14 months, and psychological distress at 14 months using the Profile of Mood States (POMS) scale.

1  
2  
3  
4 Results: No effect of the intervention was observed on primary and/or secondary  
5  
6 outcomes after 6 and 14 months.  
7

8  
9 Conclusion: A multimodal intervention aiming to give the GP an enhanced role in cancer  
10  
11 patients' rehabilitation did not improve quality of life or psychological distress.  
12

13 Trial registration: ClinicalTrials.gov, registration ID number NCT01021371.  
14  
15  
16  
17  
18  
19  
20  
21  
22  
23  
24  
25  
26  
27  
28  
29  
30  
31  
32  
33  
34  
35  
36  
37  
38  
39  
40  
41  
42  
43  
44  
45  
46  
47  
48  
49  
50  
51  
52  
53  
54  
55  
56  
57  
58  
59  
60



## Background

Addressing the unmet needs of individual rehabilitation of cancer patients is paramount (1-4). The underlying problems are often psychological or social and many persist after treatment or emerge late in the illness continuum (5-8). Rehabilitation is defined by WHO as “a process intended to enable people with disabilities to reach and maintain optimal physical, sensory, intellectual, psychological and/or social function” (9) which is the conceptual frame for this study. Hence, rehabilitation is a complex and long-lasting process, but evidence on how and when to identify the patients’ needs, what initiatives to offer, and how to manage the efforts is sparse (2;10-13).

General practice is characterised by continuity with frequent encounters with each patient, covering wide-ranging issues (14). Hence, general practitioners (GPs) generally have profound knowledge about the patients’ prior health status, mental vulnerability and social network. General practice may, therefore, be able to initiate the rehabilitation process and take on the task of coordinating or providing the rehabilitation services needed, but currently the role of GPs is not well-defined (15-23). Studies do, however, show that GPs are willing to undertake these tasks and that the patients wish that their GPs were more proactive in doing so (24-25).

The objective of this trial was to investigate the effect of a multimodal intervention giving the GP an enhanced role in improving patients’ health-related quality of life and psychological distress following cancer. To validate our results we conducted subgroup analyses of the large and homogeneous group of breast cancer patients.

## Material and methods

We conducted a cluster randomised, controlled trial where all general practices in Denmark were randomised to an intervention group or to a control group **by means of the unique provider number of each practice**. Patients were subsequently allocated according to the randomisation of their GP. Feasibility of the intervention and the study details have previously been published (26).

### *Participants*

All adult patients ( $\geq 18$  years) newly diagnosed with cancer and admitted to Vejle Hospital between 12 May 2008 and 28 February 2009 were assessed for eligibility. Patients were included if treated at Vejle Hospital for a cancer diagnosed within the last 3 months and if listed with a general practice. Patients with carcinoma in situ or non-melanoma skin cancers were not included (Figure 1).

Two rehabilitation coordinators, both nurses with oncological experience, assessed all patients for eligibility and managed the intervention. The patients were sampled across departments, type of cancer, stage, and potential rehabilitation needs by use of the electronic patient files (26).

### *Setting*

The study was conducted at Vejle Hospital, a public general hospital in the region of Southern Denmark (1.2 million inhabitants) (27). Cancer patients were allocated from all of Denmark.

The Danish publicly funded healthcare system ensures free access to general practice which is responsible for primary care needs, and GPs function as gatekeepers to

1  
2  
3  
4 the rest of the healthcare system. More than 98% of all Danish residents are registered  
5  
6 with a general practice. On average each GP meets 9 incident cancer patients during one  
7  
8 year (28).  
9

10  
11 GPs' opportunities to refer patients to relevant rehabilitation services vary between  
12  
13 the different municipalities, just as the availability of private patient associations and other  
14  
15 relief organisations. These conditions might influence the quality of the rehabilitation  
16  
17 interventions offered.  
18  
19

### 20 21 *The intervention*

22  
23 The intervention comprised a patient interview about rehabilitation needs performed by the  
24  
25 rehabilitation coordinators, followed by information to the GP about the patient's individual  
26  
27 rehabilitation needs and cancer patients' rehabilitation needs in general. The core of the  
28  
29 information was that the GP was encouraged to contact the patient to facilitate a  
30  
31 rehabilitation process (Figure 2).  
32  
33

34  
35 The patient interviews were conducted according to an interview guide (29) and  
36  
37 based on a checklist of general needs and problems among cancer patients (Figure 2).  
38  
39 Interviews were most often conducted at the hospital, but in some cases by phone. During  
40  
41 the interview, the concept of rehabilitation was explained and the individual needs for  
42  
43 physical, psychological, sexual, social, work- and economy-related rehabilitation were  
44  
45 identified. It was explained that physical, psychological, sexual, social, work-related and  
46  
47 financial issues (1-4;30) might occur at any time and change during the disease trajectory  
48  
49 (7-8). In order to address these problems, patients were advised to consult their GP during  
50  
51 treatment and after discharge.  
52  
53  
54  
55  
56  
57  
58  
59  
60

1  
2  
3  
4 Following each interview, the patient's GP was informed about the patient's actual  
5  
6 problems and needs for rehabilitation and encouraged to be proactive, i.e. the GP was  
7  
8 encouraged to contact the patient personally to offer support and guidance in order to  
9  
10 identify and address actual and future needs for rehabilitation. Subsequently, the GP  
11  
12 received an e-mail summarising the information, supplemented by general information  
13  
14 about cancer patients' needs and problems (Figure 3). The information was personally  
15  
16 conveyed by phone, if possible, and always sent electronically along with the more general  
17  
18 information. Patients and GPs in the control group received the usual care and were not  
19  
20 contacted by the rehabilitation coordinators (26).  
21  
22  
23  
24  
25

### 26 *Outcomes and sampling of data*

27  
28 The primary outcome was health-related quality of life measured 6 months after inclusion  
29  
30 using the Global Health Status of the European Organization for Research and Treatment  
31  
32 of Cancer Quality of Life Questionnaire Core 30 (EORTC QLQ-C30) (31;32). The  
33  
34 secondary outcomes were psychological distress at 14 months assessed by the 6 scales  
35  
36 of the Profile of Mood States (POMS) (33) (depression/dejection, anger/hostility,  
37  
38 tension/anxiety, vigour/activity, fatigue/inertia and confusion/bewilderment), and the Global  
39  
40 Health Status at 6 months and functional (physical, emotional, role, cognitive or social  
41  
42 functioning) and symptom scales (fatigue, nausea/vomiting, pain, dyspnoea, insomnia,  
43  
44 appetite loss, constipation, diarrhoea or financial difficulties) of the EORTC QLQ-C30 at 6  
45  
46 and 14 months.  
47  
48  
49

50  
51 Data were sampled in identical ways irrespective of allocation status by use of  
52  
53 patient questionnaires administered to patients alive at 6 and 14 months after inclusion.  
54  
55 Non-responders were sent one reminder after 3 weeks (26).  
56  
57  
58  
59  
60

### *Sample size*

The sample size was estimated based on the primary outcome measure. According to the EORTC Tables of Reference Values (34) for all cancer patients, all stages, the Global Health Status is normally distributed with a mean of 61.3 and an SD of 24.2. A change of at least 8 units was assumed to be clinically relevant (34;35).

If the lowest acceptable statistical power was 80%, then, based on the two-sample t-test with a type 1 error  $\alpha=0.05$ , the sample size was calculated to be 144 patients per group. The study was subject to clustering because the unit of randomisation was at the level of the GP, whereas the primary outcome measure was at the level of the patient. A strong effect on outcome of the individual practice was expected, but no data supported estimation of cluster effect. To allow maximum clustering it was attempted to include patients to each group from a minimum of 144 practices.

### *Randomisation*

Prior to study start, all 2181 general practices in Denmark were randomly allocated to the intervention or control group by the unique provider number of each practice using a computerised random-number generator in the statistical program Stata version 10.0 (StataCorp, College Station, TX, USA). Hence, randomisation was performed at practice level meaning that all GPs working under the same provider number were allocated to the same group. Consequently, spill-over effect between GPs and patients from the same practice was minimised.

### *Blinding*

1  
2  
3  
4 The study was not blinded. The list of randomisation was available to the RCs during  
5  
6 assessment of patient eligibility. Allocation status was obvious during intervention.  
7  
8  
9

### 10 *Statistical analysis*

11  
12 Baseline patient characteristics were described using descriptive statistics in order to  
13  
14 present the distribution of age, sex and cancer type. We conducted intention to treat  
15  
16 analyses and numerical outcomes of the RCT were analysed using a **multi-level linear**  
17  
18 **model, accounting for possible cluster effects caused by the cluster randomisation.** All  
19  
20 secondary outcomes were adjusted for confounding effect of age and sex. Missing values  
21  
22 were regarded as missing at random.  
23  
24

25  
26 The statistical analyses were performed using Stata version 11.0 (StataCorp,  
27  
28 College Station, TX, USA).  
29  
30

### 31 *Development and piloting of questionnaires and intervention*

32  
33 Before designing the intervention we established a theoretical basis through review of  
34  
35 papers, reports and textbooks about the problems faced by cancer patients and GPs with  
36  
37 respect to individual rehabilitation and continuity across healthcare sectors (1-3;16-24;36).  
38  
39  
40

41  
42 The questionnaires and the procedures of identification, assessment and inclusion  
43  
44 of patients were pilot tested prior to study start. The procedures have been described in  
45  
46 detail (26).  
47  
48  
49  
50  
51  
52  
53  
54  
55  
56  
57  
58  
59  
60

## Results

In total 955 patients fulfilled the criteria for inclusion and 486 patients were allocated to the intervention group and 469 to the control group (Figure 1). The patients were registered with 323 general practices. Patients were on average aged 63 years at baseline and 72% were female. The most frequent cancer localisations were breast (43%) and lung (15%). The intervention and control groups showed similar baseline characteristics (Table 1). For the primary outcome, Global Health Status at 6 months, we obtained data from 281 patients from 131 practices in the intervention group and 297 patients from 125 practices in the control group, in total 612 of 858 (71%) patients (95%-confidence interval for ICC 0.000 - 0.103) (Figure 1).

The intervention had no statistically significant impact on the primary or on the secondary outcomes (Tables 2 and 3). Adjustment for age and sex of the secondary outcomes showed results similar to the unadjusted analysis. Intention to treat analyses on all outcomes of the group of breast cancer patients showed no statistical differences between patients in the intervention and control group (mean difference in primary outcome of 1.77 (-3.2 to 6.8)). Per protocol analyses on all outcomes were used to analyse if the personal telephone contact to the GP was crucial. The patients receiving all elements of the intervention showed no statistically significant difference when compared to the control group (mean difference in primary outcome of -4.43 (-9.7 to 0.8)).

## Discussion

### *Principal findings*

This intervention including a hospital-based patient interview about rehabilitation, individual and general information to the GP and an encouragement to contact the patient and

1  
2  
3  
4 facilitate a process of rehabilitation did not improve quality of life or relieve psychological  
5  
6 distress of patients newly diagnosed with cancer.  
7  
8

9  
10  
11 *Strengths and weaknesses of the study*

12  
13 The study included 955 patients and the pre-study power calculation and the precision of  
14  
15 the statistical estimates indicate that the study could have detected relevant effects of the  
16  
17 intervention. The confidence interval of the difference in global health status after 6 months  
18  
19 ranged between -2.4 and 4.9 units. Clinically relevant differences have been suggested to  
20  
21 correspond to at least 8 units (34;35).  
22  
23

24 An important question is whether any spill-over effects may have improved care for  
25  
26 the patients in the control group, leading to an apparently smaller impact of the  
27  
28 intervention. Information about the study and the concept of rehabilitation was given to the  
29  
30 staff at the involved departments at Vejle Hospital during the inclusion period, but the  
31  
32 intervention was managed by the two rehabilitation coordinators without influence on the  
33  
34 care provided for the patients in the control group. The cluster randomisation was  
35  
36 performed to ensure that GPs only cared for patients in either the intervention or the  
37  
38 control group. GPs in the control group were not informed about the study and we have no  
39  
40 reason to believe that information about the study was disseminated between GPs in the  
41  
42 two groups.  
43  
44

45  
46 Another question is whether we used the most relevant outcome measures.  
47  
48 Process measures are often used to evaluate interventions. However, despite successful  
49  
50 implementation of interventions, the impact on patients' wellbeing is often sparse. Hence,  
51  
52 we deliberately chose patients' quality of life as the primary outcome. Further, the EORTC  
53  
54  
55  
56  
57  
58  
59  
60



1  
2  
3  
4 QLQ-C30 and the POMS questionnaires are both well-validated instruments to evaluate  
5  
6 change of quality of life in cancer patients and psychological distress in general (31-35).  
7

8  
9 The intervention was designed to support rehabilitation irrespective of the character  
10  
11 of the problem, cancer type, age and sex. We included patients with various cancer types,  
12  
13 different prognosis, health problems and needs of supportive care. The inhomogeneity of  
14  
15 the study population might have diluted effects in groups of patients with specific problems  
16  
17 or diagnoses. It cannot be ruled out that a similar intervention might have effect on  
18  
19 subgroups of patients with specific cancers or special needs. However, no effect was  
20  
21 observed when analysing the large and rather homogeneous group of breast cancer  
22  
23 patients.  
24

25  
26 The intervention included a personal telephone contact to the patients' GP but some  
27  
28 GPs were not reachable (26). A priori we assumed that this personal contact could be of  
29  
30 major importance, but per protocol analysis showed no differences in outcomes for  
31  
32 patients where the rehabilitation coordinators managed to reach the GP by phone.  
33  
34

### 35 36 37 *Relations to other studies*

38  
39 To our knowledge, only three papers have specifically evaluated the impact of GP  
40  
41 involvement in cancer rehabilitation in a randomised design (17;36-37). A shared care  
42  
43 programme (n=250) conducted in Denmark in 2003 included transfer of knowledge from  
44  
45 oncologists to GPs, improved communication between parties, and active patient  
46  
47 involvement (17). This intervention had a positive impact on patient evaluation of  
48  
49 cooperation between primary and secondary healthcare sectors, but not on quality of life.  
50  
51 A Norwegian study from 2005 (n=91) evaluated the effect of an invitation to a 30-minute  
52  
53 consultation with the patient's GP, aiming at creating a closer and more frequent contact  
54  
55  
56  
57  
58  
59  
60

1  
2  
3  
4 between patients and GPs (36). No increase in number of consultations or improvement of  
5  
6 quality of life was observed. The latest study was conducted in Sweden in 2008 (n=481)  
7  
8 and tested the effectiveness of individual support, group rehabilitation and a combination  
9  
10 of the two compared to standard care (37). The individual support included individual  
11  
12 psychological and nutritional support along with intensified primary health care, including  
13  
14 extended information about the diagnosis, education in cancer care, and supervision of the  
15  
16 patient's home care nurse and GP by a multi-professional oncology team. **The Swedish**  
17  
18 study did not show an improvement either in quality of life or psychological well-being  
19  
20 when compared to standard care. **Further, a systematic review (38) including the three**  
21  
22 **studies concluded that none of the interventions improved quality of life or patient**  
23  
24 **wellbeing, but due to possible methodological problems further studies on the topic are**  
25  
26 **needed.**  
27  
28  
29  
30  
31  
32

### 33 *Meaning*

34  
35 Interventions aiming to give the GP an enhanced role in cancer rehabilitation seem to have  
36  
37 difficulties improving quality of life. Furthermore, a number of papers evaluating the effect  
38  
39 of various other types of interventions aiming to improve quality of life of cancer patients  
40  
41 (39-44) have demonstrated that this may be difficult in general. **To better understand the**  
42  
43 **intervention and the impact on GP and patient behaviour further studies will include**  
44  
45 **evaluation of process measures like GP proactivity, patient participation in different**  
46  
47 **rehabilitation activities, and GP and patient satisfaction.**  
48  
49  
50

51  
52 Future studies should evaluate the importance of the organisation of cancer  
53  
54 treatment and rehabilitation. Is an unclear organisation with many partners (hospital  
55  
56 departments, GPs, municipalities and private organisations) an impediment to effective  
57  
58  
59  
60

1  
2  
3  
4 rehabilitation? A well-organised system with defined roles and easy referral to various  
5  
6 elements of rehabilitation (specialised physiotherapy, social counselling, psychological  
7  
8 advice etc.) may be of importance for the effect of a GP intervention. To improve  
9  
10 rehabilitation it may also be important to develop screening tools that support identification  
11  
12 of patients with special needs. Initiatives supporting the GPs in undertaking a proactive  
13  
14 role for patients with special needs should be considered. The effect of interventions  
15  
16 should, however, be carefully evaluated in order to ensure efficient use of resources  
17  
18 before implementation.  
19  
20  
21  
22  
23  
24  
25  
26  
27  
28  
29  
30  
31  
32  
33  
34  
35  
36  
37  
38  
39  
40  
41  
42  
43  
44  
45  
46  
47  
48  
49  
50  
51  
52  
53  
54  
55  
56  
57  
58  
59  
60

Figure 1. Study flow.

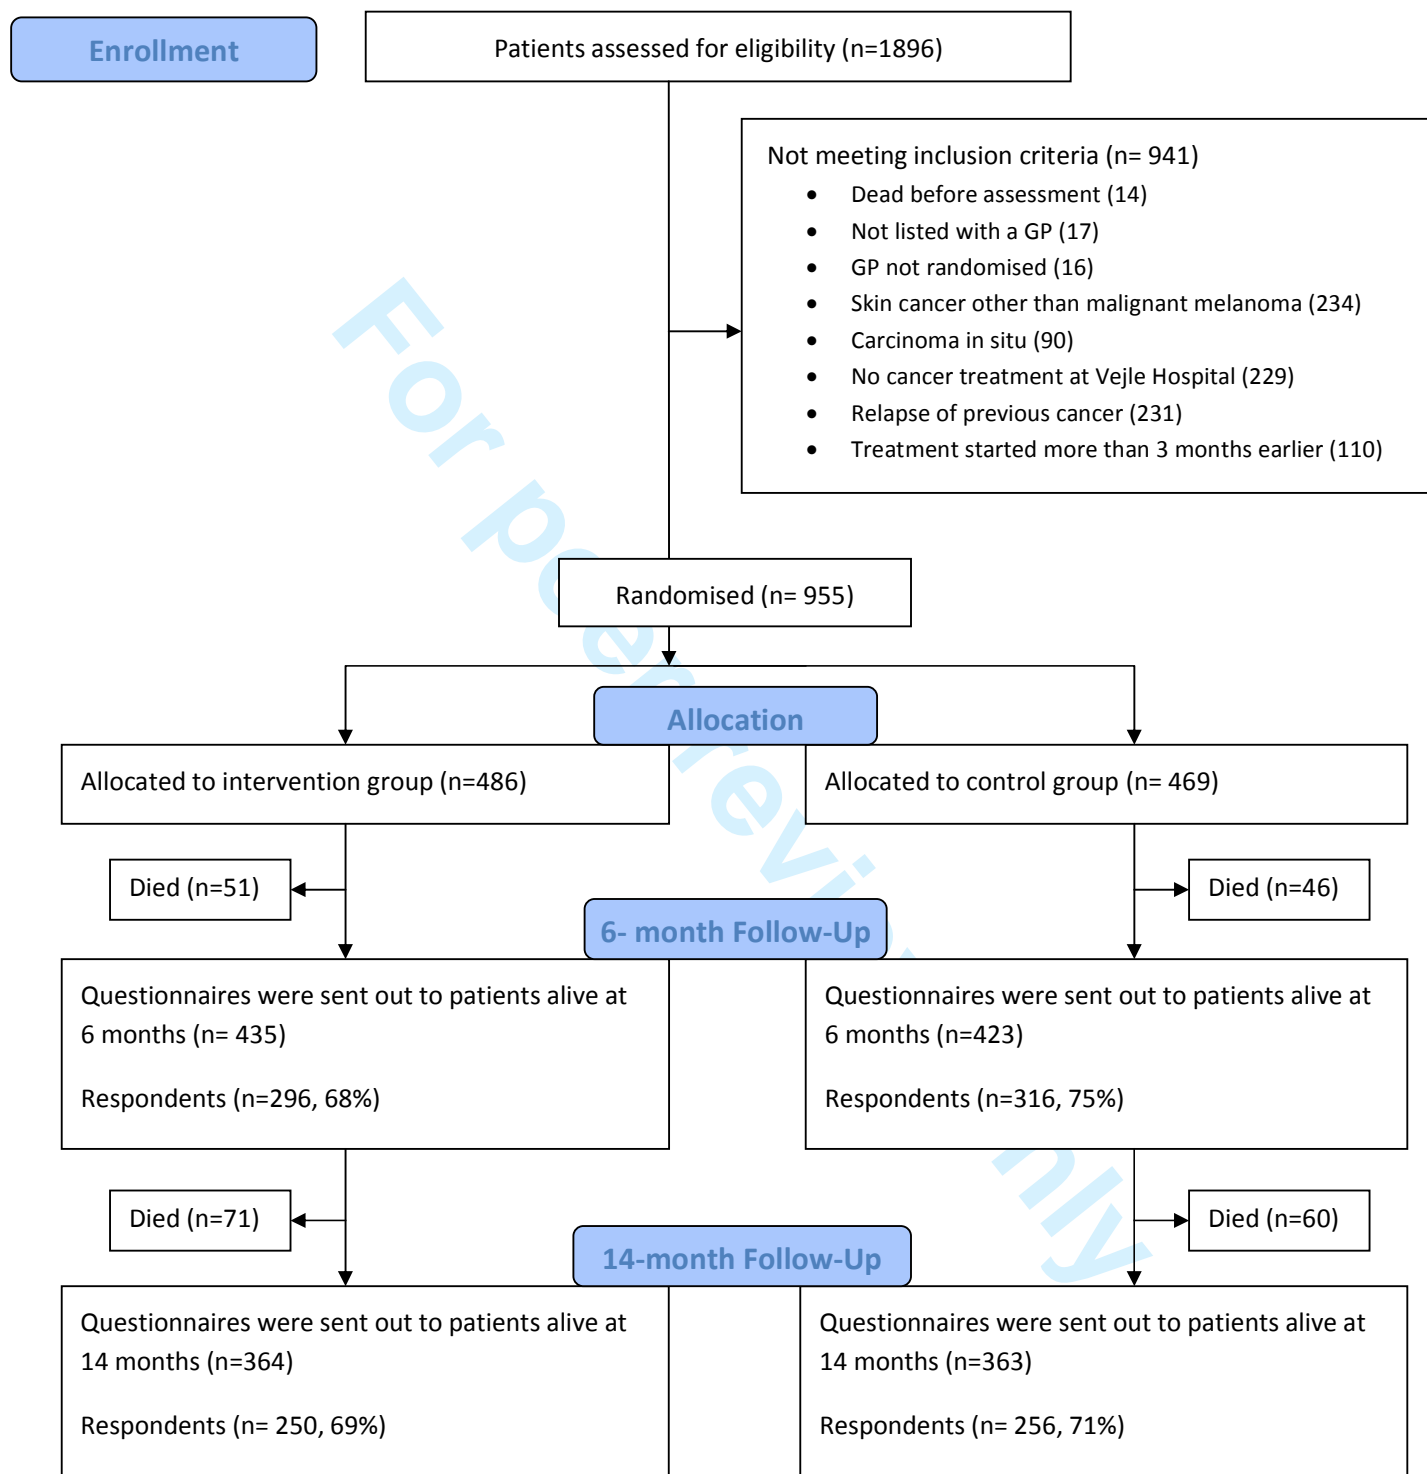

Figure 2. General needs and problems among cancer patients.

|                     |                                                                                                                                                                                                                                                                                                                                                                                                                                                                                                                                          |
|---------------------|------------------------------------------------------------------------------------------------------------------------------------------------------------------------------------------------------------------------------------------------------------------------------------------------------------------------------------------------------------------------------------------------------------------------------------------------------------------------------------------------------------------------------------------|
| Psychological level | <ul style="list-style-type: none"> <li>• Fear of death or recurrence</li> <li>• Guilt feelings about being sick</li> <li>• Anger at general practitioner or “system” for not having taken action soon enough</li> <li>• Troubles adjusting to new self-image</li> <li>• Sense of being left in limbo after discharge from the hospital</li> <li>• Risk of developing depression</li> <li>• Reconsiderations about priorities in life and how one wants to live life with or after a cancer disease</li> <li>• Sexual problems</li> </ul> |
| Social level        | <ul style="list-style-type: none"> <li>• Concerns about the well-being of spouse, children and other relatives</li> <li>• Changed body image or sexuality</li> <li>• Changed position/status in marriage, in family, at work, etc.</li> <li>• Concerns about possible infertility caused by treatment</li> <li>• Information about patient associations and similar groups for patients and relatives</li> </ul>                                                                                                                         |
| Physical level      | <ul style="list-style-type: none"> <li>• Physical capacity according to daily activities, need for special facilities, homecare, conversions of the home, etc.</li> <li>• Need for dietary advice, e.g. to prevent undue weight loss</li> <li>• Support in order to accept physical changes and late complications like tiredness, amputation, infertility, pain, etc.</li> </ul>                                                                                                                                                        |
| Work-related level  | <ul style="list-style-type: none"> <li>• Concerns about losing one's job</li> <li>• Concerns about having to give up one's former responsibilities or change field of work due to reduced ability to work</li> <li>• Opportunities for financial support during sick-leave, flexible job, etc.</li> <li>• Support to keep in contact with workplace during sick-leave</li> </ul>                                                                                                                                                         |
| Financial level     | <ul style="list-style-type: none"> <li>• Social rights like mileage allowances, reimbursement of assistive technology, etc.</li> <li>• Concerns about a decrease in income and consequences hereof in relation to housing, spouse, children, etc.</li> <li>• Conditions regarding pension or incapacity benefit</li> </ul>                                                                                                                                                                                                               |

Table 1. Baseline demographic and medical characteristics for all included patients (n=955).

| <b>Demographic characteristics</b> | Control group<br>(n=469) | Intervention group<br>(n=486) |
|------------------------------------|--------------------------|-------------------------------|
| Age, years                         |                          |                               |
| Mean (CI)                          | 63.6 (62.5 to 64.6)      | 63.2 (62.2 to 64.3)           |
| Median                             | 64                       | 64                            |
| Range                              | 21 to 98                 | 28 to 92                      |
| Sex                                |                          |                               |
| Male (%)                           | 134 (28.6)               | 133 (27.4)                    |
| Female (%)                         | 335 (71.4)               | 353 (72.6)                    |
| <b>Cancer type</b>                 | Numbers (%)              | Numbers (%)                   |
| Cancer of breast                   | 206 (43.9)               | 201 (41.4)                    |
| Cancer of lung                     | 69 (14.7)                | 75 (15.4)                     |
| Malignant melanoma                 | 44 (9.4)                 | 35 (7.2)                      |
| Cancer of rectum/anus              | 33 (7.0)                 | 45 (9.3)                      |
| Cancer of colon                    | 29 (6.2)                 | 39 (8.0)                      |
| Cancer of ovaries                  | 12 (2.6)                 | 9 (1.9)                       |
| Cancer of biliary system           | 7 (1.5)                  | 8 (1.6)                       |
| Cancer of brain                    | 6 (1.3)                  | 8 (1.6)                       |
| Cancer of prostate                 | 8 (1.7)                  | 3 (0.6)                       |
| Cancer of corpus uteri             | 6 (1.3)                  | 5 (1.0)                       |
| Myelomatosis                       | 6 (1.3)                  | 5 (1.0)                       |
| Lymphoma                           | 3 (0.6)                  | 4 (0.8)                       |
| Unspecified location               | 16 (3.4)                 | 16 (3.3)                      |
| Other diagnoses                    | 24 (5.1)                 | 33 (6.8)                      |

Table 2. Health-Related Quality of Life (EORTC QLQ-C30) outcome variables and mean differences at 6 and 14 months (95% confidence intervals).

| Outcome variable         | 6 months |                     |                          |      | 14 months |                     |                          |      |
|--------------------------|----------|---------------------|--------------------------|------|-----------|---------------------|--------------------------|------|
|                          | n        | Mean (CI)           | Mean difference (95% CI) | P    | n         | Mean (CI)           | Mean difference (95% CI) | P    |
| Global Health Status/qol |          |                     |                          |      |           |                     |                          |      |
| Control group            | 297      | 68.0 (65.5 to 70.5) |                          |      | 246       | 72.8 (70.3 to 75.3) |                          |      |
| Intervention group       | 281      | 69.3 (66.7 to 71.9) | 1.25 (-2.4 to 4.9)       | 0.50 | 240       | 72.1 (69.6 to 74.7) | -0.71 (-4.3 to 2.8)      | 0.69 |
| Physical functioning     |          |                     |                          |      |           |                     |                          |      |
| Control group            | 294      | 79.0 (76.4 to 81.5) |                          |      | 240       | 81.9 (79.3 to 84.5) |                          |      |
| Intervention group       | 280      | 79.7(77.1 to 82.4)  | 0.77 (-2.9 to 4.4)       | 0.68 | 234       | 82.0 (79.4 to 84.6) | -0.08 (-3.6 to 3.8)      | 0.97 |
| Role functioning         |          |                     |                          |      |           |                     |                          |      |
| Control group            | 291      | 71.3 (67.7 to 74.9) |                          |      | 239       | 78.0 (74.4 to 81.7) |                          |      |
| Intervention group       | 277      | 72.5 (68.8 to 76.1) | 1.18 (-3.9 to 6.3)       | 0.65 | 235       | 78.8 (75.0 to 82.5) | 0.70 (-4.5 to 5.9)       | 0.79 |
| Emotional functioning    |          |                     |                          |      |           |                     |                          |      |
| Control group            | 293      | 80.5 (78.1 to 83.0) |                          |      | 240       | 80.7 (77.9 to 83.4) |                          |      |
| Intervention group       | 278      | 81.6 (79.1 to 84.1) | 1.02 (-2.5 to 4.5)       | 0.57 | 238       | 80.8 (78.0 to 83.6) | 0.12 (-3.8 to 4.1)       | 0.95 |
| Cognitive functioning    |          |                     |                          |      |           |                     |                          |      |
| Control group            | 290      | 83.0 (80.5 to 85.5) |                          |      | 245       | 82.6 (79.7 to 85.5) |                          |      |
| Intervention group       | 278      | 83.9 (81.3 to 86.4) | 0.88 (-2.7 to 4.5)       | 0.63 | 238       | 85.1 (82.1 to 88.2) | 2.53 (-1.7 to 6.7)       | 0.24 |
| Social functioning       |          |                     |                          |      |           |                     |                          |      |
| Control group            | 295      | 85.7 (83.0 to 88.4) |                          |      | 242       | 88.2 (85.4 to 91.0) |                          |      |
| Intervention group       | 280      | 86.0 (83.2 to 88.8) | 0.28 (-3.6 to 4.2)       | 0.89 | 238       | 87.4 (84.6 to 90.3) | -0.77 (-4.8 to 3.2)      | 0.71 |
| Fatigue                  |          |                     |                          |      |           |                     |                          |      |
| Control group            | 292      | 37.4 (34.3 to 40.6) |                          |      | 244       | 32.1 (28.8 to 35.3) |                          |      |
| Intervention group       | 279      | 34.2 (30.9 to 37.4) | -3.27 (-7.8 to 1.3)      | 0.16 | 234       | 32.3 (28.9 to 35.6) | 0.23 (-4.5 to 4.9)       | 0.92 |
| Nausea and vomiting      |          |                     |                          |      |           |                     |                          |      |
| Control group            | 300      | 8.1 (6.1 to 10.0)   |                          |      | 244       | 5.5 (3.9 to 7.2)    |                          |      |
| Intervention group       | 284      | 8.0 (6.0 to 10.0)   | -0.11 (-2.9 to 2.7)      | 0.94 | 236       | 5.6 (3.9 to 7.3)    | 0.05 (-2.3 to 2.4)       | 0.97 |
| Pain                     |          |                     |                          |      |           |                     |                          |      |
| Control group            | 283      | 23.0 (19.8 to 26.2) |                          |      | 241       | 21.9 (18.5 to 25.4) |                          |      |
| Intervention group       | 274      | 22.0 (18.8 to 25.3) | -0.95 (-5.5 to 3.6)      | 0.68 | 234       | 21.4 (17.8 to 24.9) | -0.56 (-5.5 to 4.4)      | 0.83 |
| Dyspnoea                 |          |                     |                          |      |           |                     |                          |      |
| Control group            | 297      | 17.0 (13.9 to 20.2) |                          |      | 245       | 13.2 (10.0 to 16.5) |                          |      |
| Intervention group       | 286      | 17.9 (14.7 to 21.2) | 0.87 (-3.6 to 5.4)       | 0.71 | 233       | 15.4 (11.9 to 18.8) | 2.11 (-2.6 to 6.8)       | 0.38 |
| Insomnia                 |          |                     |                          |      |           |                     |                          |      |
| Control group            | 302      | 27.5 (24.0 to 31.0) |                          |      | 248       | 29.6 (25.6 to 33.6) |                          |      |
| Intervention group       | 285      | 27.3 (23.6 to 30.9) | -0.23 (-5.3 to 4.8)      | 0.93 | 240       | 28.5 (24.4 to 32.6) | -1.08 (-6.8 to 4.6)      | 0.71 |
| Appetite loss            |          |                     |                          |      |           |                     |                          |      |
| Control group            | 301      | 14.1 (11.0 to 17.2) |                          |      | 246       | 9.6 (7.1 to 12.2)   |                          |      |
| Intervention group       | 288      | 15.9 (12.7 to 19.0) | 1.79 (-2.7 to 6.2)       | 0.43 | 239       | 7.9 (5.4 to 10.5)   | -1.67 (-5.3 to 2.0)      | 0.37 |
| Constipation             |          |                     |                          |      |           |                     |                          |      |
| Control group            | 299      | 12.6 (9.7 to 15.5)  |                          |      | 248       | 11.9 (9.0 to 14.9)  |                          |      |
| Intervention group       | 284      | 11.3 (8.3 to 14.2)  | -1.33 (-5.4 to 2.8)      | 0.53 | 236       | 8.9 (5.9 to 11.9)   | -3.03 (-7.4 to 1.1)      | 0.16 |
| Diarrhoea                |          |                     |                          |      |           |                     |                          |      |
| Control group            | 299      | 11.3 (8.8 to 13.9)  |                          |      | 250       | 11.4 (8.5 to 14.2)  |                          |      |
| Intervention group       | 284      | 11.4 (8.8 to 14.1)  | 0.08 (-3.6 to 3.8)       | 0.97 | 238       | 10.0 (7.0 to 13.0)  | -1.38 (-5.5 to 2.8)      | 0.51 |
| Financial difficulties   |          |                     |                          |      |           |                     |                          |      |
| Control group            | 297      | 7.6 (5.4 to 9.8)    |                          |      | 242       | 6.5 (3.9 to 9.0)    |                          |      |
| Intervention group       | 284      | 8.0 (5.7 to 10.2)   | 0.34 (-2.8 to 3.5)       | 0.83 | 236       | 6.7 (4.1 to 9.4)    | 0.27 (-3.4 to 4.0)       | 0.89 |

Mean values from 0 to 100. A score of 100 indicates optimal function or maximum symptom intensity (i.e. for functional measures, an increase indicates improvement, while for symptoms, an increase indicates worsening)

Table 3. Psychological distress (POMS) at 14 months and mean differences between groups (95 confidence intervals).

| Outcome variable       | n   | Mean range | Mean (95% CI)         | Mean difference (95% CI) | P    |
|------------------------|-----|------------|-----------------------|--------------------------|------|
| Anger/hostility        |     | 0 to 28    |                       |                          |      |
| Control group          | 223 |            | 2.03 (1.59 to 2.48)   |                          |      |
| Intervention group     | 230 |            | 1.88 (1.43 to 2.33)   | -0.15 (-0.79 to 0.48)    | 0.64 |
| Confusion/bewilderment |     | 0 to 20    |                       |                          |      |
| Control group          | 229 |            | 2.45 (2.04 to 2.86)   |                          |      |
| Intervention group     | 231 |            | 2.11 (1.69 to 2.53)   | -0.34 (-0.92 to 0.25)    | 0.26 |
| Depression/dejection   |     | 0 to 32    |                       |                          |      |
| Control group          | 223 |            | 3.85 (3.20 to 4.51)   |                          |      |
| Intervention group     | 229 |            | 3.26 (2.61 to 3.92)   | -0.59 (-1.52 to 0.34)    | 0.21 |
| Fatigue/inertia        |     | 0 to 20    |                       |                          |      |
| Control group          | 226 |            | 4.65 (4.08 to 5.22)   |                          |      |
| Intervention group     | 234 |            | 4.14 (3.02 to 4.10)   | -0.51 (-1.32 to 0.29)    | 0.21 |
| Tension/anxiety        |     | 0 to 24    |                       |                          |      |
| Control group          | 226 |            | 3.82 (3.28 to 4.36)   |                          |      |
| Intervention group     | 233 |            | 3.56 (3.02 to 4.10)   | -0.26 (-1.02 to 0.50)    | 0.50 |
| Vigour/activity        |     | 0 to 24    |                       |                          |      |
| Control group          | 218 |            | 10.28 (9.51 to 11.05) |                          |      |
| Intervention group     | 228 |            | 10.09 (9.31 to 10.86) | -0.20 (-1.29 to 0.89)    | 0.72 |
| Total mood disturbance |     | 0 to 124   |                       |                          |      |
| Control group          | 200 |            | 4.87 (2.29 to 7.45)   |                          |      |
| Intervention group     | 210 |            | 4.19 (1.62 to 6.76)   | -0.68 (-4.32 to 2.97)    | 0.72 |

Mean values of each subscale depends on the number of items related to the individual subscale which varies from 5 to 8, each item ranging from 0 to 4. Total mood disturbance is calculated by summing up the scores on the five negative symptom subscales and subtracting the score on the one positively scored subscale, vigour/activity. A higher score indicates a higher degree of symptoms/feelings within the related subscale.



## Contributors

SHB, JK, JS and DGH contributed to conception and study design. SHB, DGH, JK and JS obtained the funding. SHB, JK, JS and DGH wrote the protocol. SHB and DGH were responsible for recruitment of patients. SHB collected and managed the data. PVL was the study statistician. SHB and PVL performed the statistical analysis. SHB, PVL, JK, JS and DGH contributed to the interpretation of data. SHB drafted the first version of the manuscript. SHB, JK, JS, PVL and DGH critically reviewed, revised, and supplemented the manuscript. All authors approved the final version. SHB is the guarantor.

## Licence for publication

The Corresponding Author has the right to grant on behalf of all authors and does grant on behalf of all authors, an exclusive licence (or non exclusive for government employees) on a worldwide basis to the BMJ Publishing Group Ltd and its licensees, to permit this article (if accepted) to be published in BMJ editions and any other BMJPG products and to exploit all subsidiary rights, as set out in our licence (<http://resources.bmj.com/bmj/authors/checklists-forms/licence-for-publication>).

## Funding

This study was funded by the Danish Cancer Society, the Novo Nordisk Foundation and the Region of Southern Denmark. The National Research Center for Cancer Rehabilitation is funded by the Danish Cancer Society. The authors' work was independent from the funders.

## Competing interests

All authors have completed the ICMJE uniform disclosure form at [www.icmje.org/coi\\_disclosure.pdf](http://www.icmje.org/coi_disclosure.pdf) and declare: no support from any organisation for the submitted

21 Enhanced involvement of general practitioners in cancer rehabilitation: a RCT, December 2011, Stinne Holm Bergholdt  
work; no financial relationships with any organisations that might have an interest in the submitted  
work in the previous 3 years; no other relationships or activities that could appear to have  
influenced the submitted work.

### **Ethical approval**

The study was approved by the Danish Data Protection Agency. The Regional Committee on Biomedical Research Ethics evaluated the project and concluded that the intervention did not need an approval from the Danish National Committee on Biomedical Research Ethics according to Danish law (Project-ID: S-20082000-7).

### **Data**

All authors had full access to all of the data in the study and can take responsibility for the integrity of the data and the accuracy of the data analysis.

### **Data sharing**

No additional data available.

### **Acknowledgement**

The authors wish to thank all patients and health care professionals who took part in the study. We also wish to thank Lise Keller Stark, Research Unit of General Practice, University of Southern Denmark, for proofreading the manuscript and Susanne Døssing Berntsen for managing datasets.

## References

- (1) Mikkelsen TH, Sondergaard J, Jensen AB, Olesen F. Cancer rehabilitation: psychosocial rehabilitation needs after discharge from hospital? *Scand J Prim Health Care* 2008;26:216-21.
- (2) Hewitt M, Greenfield S, Stovall E. *From Cancer Patient to Cancer Survivor: Lost in Transition*. The National Academies Press, Washington, D.C.: Committee on Cancer Survivorship. Improving Care and Quality of Life, National Cancer Policy Board, Institute of Medicine, and National Research Council; 2006.
- (3) Groenvold M, Pedersen C, Jensen CR, Faber MT, Johnsen AT. *The cancer patient's world-an investigation of the problems experienced by Danish cancer patients*. Danish Cancer Society, Copenhagen 2006 [in Danish].
- (4) Schmid-Buchi S, Halfens RJ, Dassen T, van den Borne B. Psychosocial problems and needs of posttreatment patients with breast cancer and their relatives. *Eur J Oncol Nurs* 2010; Jan 18. DOI:10.1016/j.ejon.2009.11.001.
- (5) Steele R, Fitch MI. Supportive care needs of patients with lung cancer. *Can Oncol Nurs J* 2010;20(1):15-22.
- (6) Steele R, Fitch MI. Supportive care needs of women with gynaecological cancer. *Cancer Nurs* 2008;31:284-91.
- (7) Armes J, Crowe M, Colbourne L, Morgan H, Murrels T, Oakley C, Palmer N, Ream E, Young A, Richardson A. Patients' supportive care needs beyond the end of cancer treatment: a prospective, longitudinal survey. *J Clin Oncol* 2009;27:6172-9.
- (8) McDowell ME, Occhipinti S, Ferguson M, Dunn J, Chambers SK. Predictors of change in unmet supportive care needs in cancer. *Psycho-Oncology* 2010;19:508-16.
- (9) World Health Organisation [internet] at <http://www.who.int/topics/rehabilitation/en>. Accessed on November 18, 2011.

- 23 Enhanced involvement of general practitioners in cancer rehabilitation: a RCT, December 2011, Stinne Holm Bergholdt
- 1 (10) Jones R, Regan M, Ristevski E, Breen S. Patients' perception of communication with  
2 clinicians during screening and discussion of cancer supportive care needs. *Patient Educ*  
3 *Couns* 2011. Jan 18. DOI: 10.1016/j.pec.2010.12.006.
  - 4 (11) Earle CC. Failing to plan is planning to fail: improving the quality of care with survivorship  
5 care plans. *J Clin Oncol* 2006;24:5112-6.
  - 6 (12) Gilbert SM, Miller DC, Hollenbeck BK, Montie JE, Wei JT. Cancer survivorship: challenges  
7 and changing paradigms. *J Urol* 2008;179:431-8.
  - 8 (13) Houlihan NG. Transitioning to cancer survivorship: plans of care. *Oncology* 2009;23(8  
9 Suppl):42-8.
  - 10 (14) Olesen F, Dickinson J, Hjortdahl P. General practice- time for a new definition. *BMJ*  
11 2000;320:354-7.
  - 12 (15) Grunfeld E, Earle CC. The interface between primary and oncology specialty care:  
13 Treatment through survivorship. *J Natl Cancer Inst Monogr* 2010;2010(40):25-30.
  - 14 (16) Smith SM, Allwright S, O'Dowd T. Does sharing care across the primary-specialty interface  
15 improve outcomes in chronic disease? A systematic review. *Am J Manag Care*  
16 2008;14:213-24.
  - 17 (17) Nielsen JD, Palshof T, Mainz J, Jensen AB, Olesen F. Randomised controlled trial of a  
18 shared care programme for newly referred cancer patients: bridging the gap between  
19 general practice and hospital. *Qual Saf Health Care* 2003;12:263-72.
  - 20 (18) Grunfeld E. Primary care physicians and oncologists are players on the same team. *J Clin*  
21 *Oncol* 2008;26:2246-7.
  - 22 (19) Grunfeld E. Cancer survivorship: a challenge for primary care physicians. *Br J Gen Pract*  
23 2005;55:741-2.
  - 24 (20) Johansson B, Berglund G, Hoffman K, Glimelius B, Sjoden PO. The role of the general  
25 practitioner in cancer care and the effect of an extended information routine. *Scand J Prim*  
26 *Health Care* 2000;18:143-8.

- 24 Enhanced involvement of general practitioners in cancer rehabilitation: a RCT, December 2011, Stinne Holm Bergholdt
- 1  
2  
3  
4  
5  
6  
7  
8  
9  
10  
11  
12  
13  
14  
15  
16  
17  
18  
19  
20  
21  
22  
23  
24  
25  
26  
27  
28  
29  
30  
31  
32  
33  
34  
35  
36  
37  
38  
39  
40  
41  
42  
43  
44  
45  
46  
47  
48  
49  
50  
51  
52  
53  
54  
55  
56  
57  
58  
59  
60
- (21) Kendall M, Boyd K, Campbell C, Cormie P, Fife S, Thomas K, et al. How do people with cancer wish to be cared for in primary care? Serial discussion groups of patients and carers. *Fam Pract* 2006;23:644-50.
- (22) Anvik T, Holtedahl KA, Mikalsen H. "When patients have cancer, they stop seeing me"--the role of the general practitioner in early follow-up of patients with cancer--a qualitative study. *BMC Fam Pract* 2006;7:19.
- (23) Bulsara C, Ward AM, Joske D. Patient perceptions of the GP role in cancer management. *Aust Fam Physician* 2005;34:299-300,302.
- (24) Mikkelsen TH. PhD-thesis: Cancer rehabilitation in Denmark – with particular focus on the present and future role of general practice. Faculty of Health Sciences, University of Aarhus, Denmark, 2009. ISBN 978-87-90004-09-5.
- (25) Kendall M, Boyd K, Campbell C, Cormie P, Fife S, Thomas K, et al. How do people with cancer wish to be cared for in primary care? Serial discussion groups of patients and carers. *Fam Pract* 2006;23:644-50.
- (26) Hansen DG, Bergholdt SH, Holm L, Kragstrup J, Bladt T, Søndergaard J. A complex intervention to enhance the involvement of general practitioners in cancer rehabilitation. Protocol for a randomised controlled trial and feasibility study of a multimodal intervention. *Acta Oncol* 2011;50:299-306.
- (27) Source: [www.regionsyddanmark.dk](http://www.regionsyddanmark.dk); 2009.
- (28) PLO Praksistælling [General Practitioners' Organisation Practice Count] Copenhagen, 2009.
- (29) Kurtz SM, Silverman JD. The Calgary-Cambridge Referenced Observation Guides: an aid to defining the curriculum and organizing the teaching in communication training programmes. *Med Educ* 1996;30:83-9.
- (30) Mikkelsen T, Søndergaard J, Sokolowski I, Jensen A, Olesen F. Cancer survivors' rehabilitation needs in a primary health care context. *Fam Pract* 2009;26:221-30.

- 25 Enhanced involvement of general practitioners in cancer rehabilitation: a RCT, December 2011, Stinne Holm Bergholdt
- 1  
2  
3  
4  
5  
6  
7  
8  
9  
10  
11  
12  
13  
14  
15  
16  
17  
18  
19  
20  
21  
22  
23  
24  
25  
26  
27  
28  
29  
30  
31  
32  
33  
34  
35  
36  
37  
38  
39  
40  
41  
42  
43  
44  
45  
46  
47  
48  
49  
50  
51  
52  
53  
54  
55  
56  
57  
58  
59  
60
- (31) Aaronson NK, Ahmedzai S, Bergman B, Bullinger M, Cull A, Duez NJ, et al. The European Organization for Research and Treatment of Cancer QLQ-C30: a quality-of-life instrument for use in international clinical trials in oncology. *J Natl Cancer Inst* 1993;85:365-76.
- (32) Groenvold M, Klee MC, Sprangers MA, Aaronson NK. Validation of the EORTC QLQ-C30 quality of life questionnaire through combined qualitative and quantitative assessment of patient-observer agreement. *J Clin Epidemiol* 1997;50:441-50.
- (33) Baker F, Denniston M, Zabora J, Polland A, Dudley WN. A POMS short form for cancer patients: psychometric and structural evaluation. *Psycho-Oncology* 2002;11:273-81.
- (34) Scott NW, Fayers PM, Aaronson NK, Bottomley A, de Graeff A, Groenvold M, Gundy C, Koller M, Petersen MA, Sprangers MAG. EORTC QLQ-C30 Reference Values Manual. EORTC Quality of Life Group 2008.
- (35) Cocks K, King MT, Velikova G, St-James MM, Fayers P, Brown J. Evidence-based guidelines for determination of sample size and interpretation of the European Organisation for the Research and Treatment of cancer Quality of Life Questionnaire Core 30. *J Clin Oncol* 2010;29:89-96. DOI: 10.1200/JCO.2010.28.0107.
- (36) Holtedal K, Norum J, Anvik T, Richardsen E. Do cancer patients benefit from short-term contact with a general practitioner following cancer treatment? A randomised, controlled study. *Support Care Cancer* 2005;13:949-956.
- (37) Johansson B, Brandberg Y, Hellbom M, Persson C, Petersson LM, Berglund G, Glimelius B. Health-related quality of life and distress in cancer patients: results from a large randomised study. *Br J Cancer* 2008;99:1975-83.
- (38) Lewis RA, Neal RD, Williams NH, France B, Hendry M, Russell D, Hughes DA, Russell I, Stuart NS, Weller D, Wilkinson C. Follow-up of cancer in primary care versus secondary care: systematic review. *Br J Gen Pract* 2009 Jul;59(564):e234-47.
- (39) Aranda S, Schofield P, Weih L, Milne D, Yates P, Faulkner R. Meeting the support and information needs of women with advanced breast cancer: a randomised controlled trial. *Br J Cancer* 2006;95:667-73.

- 26 Enhanced involvement of general practitioners in cancer rehabilitation: a RCT, December 2011, Stinne Holm Bergholdt
- 1  
2  
3  
4  
5  
6  
7  
8  
9  
10  
11  
12  
13  
14  
15  
16  
17  
18  
19  
20  
21  
22  
23  
24  
25  
26  
27  
28  
29  
30  
31  
32  
33  
34  
35  
36  
37  
38  
39  
40  
41  
42  
43  
44  
45  
46  
47  
48  
49  
50  
51  
52  
53  
54  
55  
56  
57  
58  
59  
60
- (40) Rottmann N, Dalton SO, Bidstrup PE, Würtzen H, Høybye MT, Ross L, Christensen J, Frederiksen K, Hansen DG, Johansen C. No improvement in distress and quality of life following psychosocial cancer rehabilitation. A randomised trial. *Psycho-Oncology* 2011;Feb. 8. DOI: 10.1002/pon.1924.
- (41) Ross L, Boesen EH, Dalton SO, Johansen C. Mind and cancer: does psychosocial intervention improve survival and psychological well-being? *Eur J Cancer* 2002;38;1447-57.
- (42) Fors EA, Bertheussen GF, Thune I, Juvet LK, Elvsaa IK, Oldervoll L, Anker G, Falkmer U, Lundgren S, Leivseth G. Psychosocial interventions as part of breast cancer rehabilitation programs? Results from a systematic review. *Psycho-Oncology* 2010; Sep 6. DOI: 10.1002/pon.1844
- (43) Newell SA, Sanson-Fisher RW, Savolainen NJ. Systematic review of psychological therapies for cancer Patients: overview and recommendations for future research. *J Natl Cancer Inst* 2002;94:558-84.
- (44) Uitterhoeve RJ, Vernooy M, Litjens M, Potting K, Bensing J, De Mulder P, Achterberg T van. Psychosocial interventions for patients with advanced cancer- a systematic review of the literature. *Br J Cancer* 2004;91:1050-62.



**Enhanced involvement of general practitioners in cancer rehabilitation: a randomised controlled trial**

|                                 |                                                                                                                                                                                                                                                                                                                                                                                                                                                                                                                                                                                                                                                                                                               |
|---------------------------------|---------------------------------------------------------------------------------------------------------------------------------------------------------------------------------------------------------------------------------------------------------------------------------------------------------------------------------------------------------------------------------------------------------------------------------------------------------------------------------------------------------------------------------------------------------------------------------------------------------------------------------------------------------------------------------------------------------------|
| Journal:                        | <i>BMJ Open</i>                                                                                                                                                                                                                                                                                                                                                                                                                                                                                                                                                                                                                                                                                               |
| Manuscript ID:                  | bmjopen-2011-000764.R1                                                                                                                                                                                                                                                                                                                                                                                                                                                                                                                                                                                                                                                                                        |
| Article Type:                   | Research                                                                                                                                                                                                                                                                                                                                                                                                                                                                                                                                                                                                                                                                                                      |
| Date Submitted by the Author:   | 08-Mar-2012                                                                                                                                                                                                                                                                                                                                                                                                                                                                                                                                                                                                                                                                                                   |
| Complete List of Authors:       | Bergholdt, Stinne; National Research Centre for Cancer Rehabilitation, Research Unit of General Practice, University of Southern Denmark<br>Larsen, Pia; National Research Centre for Cancer Rehabilitation, Research Unit of General Practice, University of Southern Denmark<br>Kragstrup, Jakob; National Research Centre for Cancer Rehabilitation, Research Unit of General Practice, University of Southern Denmark<br>Søndergaard, Jens; National Research Centre for Cancer Rehabilitation, Research Unit of General Practice, University of Southern Denmark<br>Hansen, Dorte; National Research Centre for Cancer Rehabilitation, Research Unit of General Practice, University of Southern Denmark |
| <b>Primary Subject Heading</b>: | Rehabilitation medicine                                                                                                                                                                                                                                                                                                                                                                                                                                                                                                                                                                                                                                                                                       |
| Secondary Subject Heading:      | Communication, General practice / Family practice, Health services research, Oncology, Public health                                                                                                                                                                                                                                                                                                                                                                                                                                                                                                                                                                                                          |
| Keywords:                       | REHABILITATION MEDICINE, PUBLIC HEALTH, PRIMARY CARE, ONCOLOGY, HEALTH SERVICES ADMINISTRATION & MANAGEMENT                                                                                                                                                                                                                                                                                                                                                                                                                                                                                                                                                                                                   |
|                                 |                                                                                                                                                                                                                                                                                                                                                                                                                                                                                                                                                                                                                                                                                                               |

SCHOLARONE™  
Manuscripts

only



## Enhanced involvement of general practitioners in cancer rehabilitation: a randomised controlled trial.

Stinne Holm Bergholdt, MD, PhD fellow<sup>1§</sup>, Pia Veldt Larsen, statistician<sup>1</sup>, Jakob Kragstrup, professor<sup>1</sup>, Jens Søndergaard, professor<sup>1</sup>, Dorte Gilså Hansen, associate professor<sup>1</sup>

<sup>1</sup> National Research Centre for Cancer Rehabilitation, Research Unit of General Practice, University of Southern Denmark, J. B. Winsløvs Vej 9B, 5000 Odense C, Denmark

§ Correspondence to:

SH Bergholdt, sbergholdt@health.sdu.dk

Keywords: Cancer, rehabilitation, general practice, quality of life, general practitioners

Words: 2588

## Abstract

Objective: To test the hypothesis that a multimodal intervention giving the general practitioner (GP) an enhanced role in cancer rehabilitation improves patients' health-related quality of life and psychological distress.

Design: Cluster randomised controlled trial. All general practices in Denmark were randomised to an intervention group or to a control group. Patients were subsequently allocated to intervention or control (usual procedures) based on the randomisation status of their GP.

Setting: All clinical departments at a public regional hospital treating cancer patients and all general practices in Denmark.

Participants: Adult patients treated for incident cancer at Vejle Hospital, Denmark, between 12 May 2008 and 28 February 2009. A total of 955 patients (486 to intervention, 469 to control group) registered with 323 general practices were included.

Intervention: The intervention included an interview about rehabilitation needs with a rehabilitation coordinator at the regional hospital, information from the hospital to the GP about individual needs for rehabilitation and an encouragement of the GP to contact the patient to offer his support with rehabilitation.

Main outcome measures: The primary outcome was health-related quality of life measured 6 months after inclusion using the European Organisation for the Research and Treatment of Cancer Quality of Life Questionnaire Core 30 (EORTC QLQ-C30). Secondary outcomes included quality of life at 14 months and additional subscales of the EORTC QLQ-C30 at 6 and 14 months, and psychological distress at 14 months using the Profile of Mood States (POMS) scale.

1  
2  
3  
4 Results: No effect of the intervention was observed on primary and/or secondary  
5  
6 outcomes after 6 and 14 months.  
7

8  
9 Conclusion: A multimodal intervention aiming to give the GP an enhanced role in cancer  
10  
11 patients' rehabilitation did not improve quality of life or psychological distress.  
12

13 Trial registration: ClinicalTrials.gov, registration ID number NCT01021371.  
14  
15  
16  
17  
18  
19  
20  
21  
22  
23  
24  
25  
26  
27  
28  
29  
30  
31  
32  
33  
34  
35  
36  
37  
38  
39  
40  
41  
42  
43  
44  
45  
46  
47  
48  
49  
50  
51  
52  
53  
54  
55  
56  
57  
58  
59  
60

## Background

Addressing the unmet needs of individual rehabilitation of cancer patients is paramount (1-4). The underlying problems are often psychological or social and many persist after treatment or emerge late in the illness continuum (5-8). Rehabilitation is defined by WHO as “a process intended to enable people with disabilities to reach and maintain optimal physical, sensory, intellectual, psychological and/or social function” (9) which is the conceptual frame for this study. Hence, rehabilitation is a complex and long-lasting process, but evidence on how and when to identify the patients’ needs, what initiatives to offer, and how to manage the efforts is sparse (2;10-13).

General practice is characterised by continuity with frequent encounters with each patient, covering wide-ranging issues (14). Hence, general practitioners (GPs) generally have profound knowledge about the patients’ prior health status, mental vulnerability and social network. General practice may, therefore, be able to initiate the rehabilitation process and take on the task of coordinating or providing the rehabilitation services needed, but currently the role of GPs is not well-defined (15-23). Studies do, however, show that GPs are willing to undertake these tasks and that the patients wish that their GPs were more proactive in doing so (24-25).

The objective of this trial was to investigate the effect of a multimodal intervention giving the GP an enhanced role in improving patients’ health-related quality of life and psychological distress following cancer. To validate our results we conducted subgroup analyses of the large and homogeneous group of breast cancer patients.

## Material and methods

We conducted a cluster randomised, controlled trial where all general practices in Denmark were randomised to an intervention group or to a control group by means of the unique provider number of each practice. Patients were subsequently allocated according to the randomisation of their GP. Feasibility of the intervention and the study details have previously been published (26).

### *Participants*

All adult patients ( $\geq 18$  years) newly diagnosed with cancer and admitted to Vejle Hospital between 12 May 2008 and 28 February 2009 were assessed for eligibility. Patients were included if treated at Vejle Hospital for a cancer diagnosed within the last 3 months and if listed with a general practice. Patients with carcinoma in situ or non-melanoma skin cancers were not included (Figure 1).

Two rehabilitation coordinators, both nurses with oncological experience, assessed all patients for eligibility and managed the intervention. The patients were sampled across departments, type of cancer, stage, and potential rehabilitation needs by use of the electronic patient files (26).

### *Setting*

The study was conducted at Vejle Hospital, a public general hospital in the region of Southern Denmark (1.2 million inhabitants) (27). Cancer patients were allocated from all of Denmark.

The Danish publicly funded healthcare system ensures free access to general practice which is responsible for primary care needs, and GPs function as gatekeepers to

1  
2  
3  
4 the rest of the healthcare system. More than 98% of all Danish residents are registered  
5  
6 with a general practice. On average each GP meets 9 incident cancer patients during one  
7  
8 year (28).  
9

10  
11 GPs' opportunities to refer patients to relevant rehabilitation services vary between  
12  
13 the different municipalities, just as the availability of private patient associations and other  
14  
15 relief organisations. These conditions might influence the quality of the rehabilitation  
16  
17 interventions offered.  
18  
19

### 20 21 *The intervention*

22  
23 The intervention comprised a patient interview about rehabilitation needs performed by the  
24  
25 rehabilitation coordinators, followed by information to the GP about the patient's individual  
26  
27 rehabilitation needs and cancer patients' rehabilitation needs in general. The core of the  
28  
29 information was that the GP was encouraged to contact the patient to facilitate a  
30  
31 rehabilitation process (Figure 2).  
32  
33  
34

35  
36 The patient interviews were conducted according to an interview guide (29) and  
37  
38 based on a checklist of general needs and problems among cancer patients (Figure 2).  
39  
40 Interviews were most often conducted at the hospital, but in some cases by phone. During  
41  
42 the interview, the concept of rehabilitation was explained and the individual needs for  
43  
44 physical, psychological, sexual, social, work- and economy-related rehabilitation were  
45  
46 identified. It was explained that physical, psychological, sexual, social, work-related and  
47  
48 financial issues (1-4;30) might occur at any time and change during the disease trajectory  
49  
50 (7-8). In order to address these problems, patients were advised to consult their GP during  
51  
52 treatment and after discharge. **The patients gave oral consent firstly to their GPs being**  
53  
54  
55  
56  
57  
58  
59  
60

1  
2  
3  
4 informed as to their individual problems and needs and secondly to their GPs being  
5  
6 encouraged to be proactive regarding the patients' rehabilitation.  
7

8  
9 Following each interview, the patient's GP was informed about the patient's actual  
10 problems and needs for rehabilitation and encouraged to be proactive, i.e. the GP was  
11 encouraged to contact the patient personally to offer support and guidance in order to  
12 identify and address actual and future needs for rehabilitation. Subsequently, the GP  
13 received an e-mail summarising the information, supplemented by general information  
14 about cancer patients' needs and problems (Figure 2). The information was personally  
15 conveyed by phone, if possible, and always sent electronically along with the more general  
16 information. Patients and GPs in the control group received the usual care and were not  
17 contacted by the rehabilitation coordinators (26).  
18  
19  
20  
21  
22  
23  
24  
25  
26  
27  
28  
29

### 30 *Outcomes and sampling of data*

31  
32 The primary outcome was health-related quality of life measured 6 months after inclusion  
33 using the Global Health Status of the European Organization for Research and Treatment  
34 of Cancer Quality of Life Questionnaire Core 30 (EORTC QLQ-C30) (31;32). The  
35 secondary outcomes were psychological distress at 14 months assessed by the 6 scales  
36 of the Profile of Mood States (POMS) (33) (depression/dejection, anger/hostility,  
37 tension/anxiety, vigour/activity, fatigue/inertia and confusion/bewilderment), and the Global  
38 Health Status at 6 months and functional (physical, emotional, role, cognitive or social  
39 functioning) and symptom scales (fatigue, nausea/vomiting, pain, dyspnoea, insomnia,  
40 appetite loss, constipation, diarrhoea or financial difficulties) of the EORTC QLQ-C30 at 6  
41 and 14 months.  
42  
43  
44  
45  
46  
47  
48  
49  
50  
51  
52  
53  
54  
55  
56  
57  
58  
59  
60

1  
2  
3  
4 Data were sampled in identical ways irrespective of allocation status by use of  
5 patient questionnaires administered to patients alive at 6 and 14 months after inclusion.  
6  
7  
8 Non-responders were sent one reminder after 3 weeks (26).  
9

### 10 11 12 *Sample size*

13  
14 The sample size was estimated based on the primary outcome measure. According to the  
15 EORTC Tables of Reference Values (34) for all cancer patients, all stages, the Global  
16 Health Status is normally distributed with a mean of 61.3 and an SD of 24.2. A change of  
17 at least 8 units was assumed to be clinically relevant (34;35).  
18  
19  
20  
21  
22

23  
24 If the lowest acceptable statistical power was 80%, then, based on the two-sample  
25 t-test with a type 1 error  $\alpha=0.05$ , the sample size was calculated to be 144 patients per  
26 group. The study was subject to clustering because the unit of randomisation was at the  
27 level of the GP, whereas the primary outcome measure was at the level of the patient.  
28  
29 A strong effect on outcome of the individual practice was expected, but no data supported  
30 estimation of cluster effect. To allow maximum clustering it was attempted to include  
31 patients to each group from a minimum of 144 practices.  
32  
33  
34  
35  
36  
37  
38  
39  
40

### 41 42 *Randomisation*

43  
44 Prior to study start, all 2181 general practices in Denmark were randomly allocated to the  
45 intervention (n=1091) or control (n=1090) group by the unique provider number of each  
46 practice using a computerised random-number generator in the statistical program Stata  
47 version 10.0 (StataCorp, College Station, TX, USA). Hence, randomisation was performed  
48 at practice level meaning that all GPs working under the same provider number were  
49  
50  
51  
52  
53  
54  
55  
56  
57  
58  
59  
60



1  
2  
3  
4 allocated to the same group. Consequently, spill-over effect between GPs and patients  
5  
6 from the same practice was minimised.  
7  
8  
9

### 10 *Blinding*

11  
12 The study was not blinded. The list of randomisation was available to the RCs during  
13  
14 assessment of patient eligibility. Allocation status was obvious during intervention.  
15  
16  
17

### 18 *Statistical analysis*

19  
20 Baseline patient characteristics were described using descriptive statistics in order to  
21  
22 present the distribution of age, sex and cancer type. We conducted intention to treat  
23  
24 analyses and numerical outcomes of the RCT were analysed using a multi-level linear  
25  
26 model, accounting for possible cluster effects caused by the cluster randomisation. All  
27  
28 secondary outcomes were adjusted for confounding effect of age and sex. Missing values  
29  
30 were regarded as missing at random. **We conducted complete case analyses.**  
31  
32  
33  
34

35 The statistical analyses were performed using Stata version 11.0 (StataCorp,  
36  
37 College Station, TX, USA).  
38  
39  
40

### 41 *Development and piloting of questionnaires and intervention*

42  
43 Before designing the intervention we reviewed papers, reports and textbooks about the  
44  
45 problems faced by cancer patients and GPs with respect to individual rehabilitation and  
46  
47 continuity across healthcare sectors (1-3;16-24;36).  
48  
49

50 The questionnaires and the procedures of identification, assessment and inclusion  
51  
52 of patients were pilot tested prior to study start. The procedures have been described in  
53  
54 detail (26).  
55  
56  
57  
58  
59  
60

## Results

In total 955 patients fulfilled the criteria for inclusion and 486 patients were allocated to the intervention group and 469 to the control group (Figure 1). The patients were registered with 323 general practices. Patients were on average aged 63 years at baseline and 72% were female. The most frequent cancer localisations were breast (43%) and lung (15%). The intervention and control groups showed similar baseline characteristics (Table 1). For the primary outcome, Global Health Status at 6 months, we obtained data from 281 patients from 131 practices in the intervention group and 297 patients from 125 practices in the control group, in total 612 of 858 (71%) patients (95%-confidence interval for ICC 0.000 - 0.103). The percentage of missing data in the primary outcome was 5.6% (similar in the intervention and control groups).

The intervention had no statistically significant impact on the primary or on the secondary outcomes (Tables 2 and 3). Adjustment for age and sex of the secondary outcomes showed results similar to the unadjusted analysis. Intention to treat analyses on all outcomes of the group of breast cancer patients showed no statistical differences between patients in the intervention and control group (mean difference in primary outcome of 1.77 (-3.2 to 6.8)). Per protocol analyses on all outcomes were used to analyse if the personal telephone contact to the GP was crucial. The patients receiving all elements of the intervention showed no statistically significant difference when compared to the control group (mean difference in primary outcome of -4.43 (-9.7 to 0.8)).

## Discussion

### *Principal findings*

This intervention including a hospital-based patient interview about rehabilitation, individual and general information to the GP and an encouragement to contact the patient and facilitate a process of rehabilitation did not improve quality of life or relieve psychological distress of patients newly diagnosed with cancer.

### *Strengths and weaknesses of the study*

The study included 955 patients and the pre-study power calculation and the precision of the statistical estimates indicate that the study could have detected relevant effects of the intervention. The confidence interval of the difference in global health status after 6 months ranged between -2.4 and 4.9 units. Clinically relevant differences have been suggested to correspond to at least 8 units (34;35).

An important question is whether any spill-over effects may have improved care for the patients in the control group, leading to an apparently smaller impact of the intervention. Information about the study and the concept of rehabilitation was given to the staff at the involved departments at Vejle Hospital during the inclusion period, but the intervention was managed by the two rehabilitation coordinators without influence on the care provided for the patients in the control group. The cluster randomisation was performed to ensure that GPs only cared for patients in either the intervention or the control group. GPs in the control group were not informed about the study and we have no reason to believe that information about the study was disseminated between GPs in the two groups.

1  
2  
3  
4 Another question is whether we used the most relevant outcome measures.

5  
6 Process measures are often used to evaluate interventions. However, despite successful  
7  
8 implementation of interventions, the impact on patients' wellbeing is often sparse. Hence,  
9  
10 we deliberately chose patients' quality of life as the primary outcome. Further, the EORTC  
11  
12 QLQ-C30 and the POMS questionnaires are both well-validated instruments to evaluate  
13  
14 change of quality of life in cancer patients and psychological distress in general (31-35).  
15

16  
17 The intervention was designed to support rehabilitation irrespective of the character  
18  
19 of the problem, cancer type, age and sex. We included patients with various cancer types,  
20  
21 different prognosis, health problems and needs of supportive care. The inhomogeneity of  
22  
23 the study population might have diluted effects in groups of patients with specific problems  
24  
25 or diagnoses. It cannot be ruled out that a similar intervention might have effect on  
26  
27 subgroups of patients with specific cancers or special needs. However, no effect was  
28  
29 observed when analysing the large and rather homogeneous group of breast cancer  
30  
31 patients.  
32  
33

34  
35 The intervention included a personal telephone contact to the patients' GP but some  
36  
37 GPs were not reachable (26). A priori we assumed that this personal contact could be of  
38  
39 major importance, but per protocol analysis showed no differences in outcomes for  
40  
41 patients where the rehabilitation coordinators managed to reach the GP by phone.  
42  
43  
44  
45

#### 46 *Relations to other studies*

47  
48 To our knowledge, only three papers have specifically evaluated the impact of GP  
49  
50 involvement in cancer rehabilitation in a randomised design (17;36-37). A shared care  
51  
52 programme (n=250) conducted in Denmark in 2003 included transfer of knowledge from  
53  
54 oncologists to GPs, improved communication between parties, and active patient  
55  
56  
57  
58  
59  
60

1  
2  
3  
4 involvement (17). This intervention had a positive impact on patient evaluation of  
5  
6 cooperation between primary and secondary healthcare sectors, but not on quality of life.  
7  
8 A Norwegian study from 2005 (n=91) evaluated the effect of an invitation to a 30-minute  
9  
10 consultation with the patient's GP, aiming at creating a closer and more frequent contact  
11  
12 between patients and GPs (36). No increase in number of consultations or improvement of  
13  
14 quality of life was observed. The latest study was conducted in Sweden in 2008 (n=481)  
15  
16 and tested the effectiveness of individual support, group rehabilitation and a combination  
17  
18 of the two compared to standard care (37). The individual support included individual  
19  
20 psychological and nutritional support along with intensified primary health care, including  
21  
22 extended information about the diagnosis, education in cancer care, and supervision of the  
23  
24 patient's home care nurse and GP by a multi-professional oncology team. The Swedish  
25  
26 study did not show an improvement either in quality of life or psychological well-being  
27  
28 when compared to standard care. Further, a systematic review (38) including the three  
29  
30 studies concluded that none of the interventions improved quality of life or patient  
31  
32 wellbeing, but due to possible methodological problems further studies on the topic are  
33  
34 needed.  
35  
36  
37  
38  
39  
40  
41  
42

### 43 *Meaning*

44  
45 Interventions aiming to give the GP an enhanced role in cancer rehabilitation seem to have  
46  
47 difficulties improving quality of life. Furthermore, a number of papers evaluating the effect  
48  
49 of various other types of interventions aiming to improve quality of life of cancer patients  
50  
51 (39-44) have demonstrated that this may be difficult in general. To better understand the  
52  
53 intervention and the impact on GP and patient behaviour further studies will include  
54  
55  
56  
57  
58  
59  
60

1  
2  
3  
4 evaluation of process measures like GP proactivity, patient participation in different  
5  
6 rehabilitation activities, and GP and patient satisfaction.  
7

8  
9  
10  
11  
12  
13  
14  
15  
16  
17  
18  
19  
20  
21  
22  
23  
24  
25  
26  
27  
28  
29  
30  
31  
32  
33  
34  
35  
36  
37  
38  
39  
40  
41  
42  
43  
44  
45  
46  
47  
48  
49  
50  
51  
52  
53  
54  
55  
56  
57  
58  
59  
60

Future studies should evaluate the importance of the organisation of cancer treatment and rehabilitation. Is an unclear organisation with many partners (hospital departments, GPs, municipalities and private organisations) an impediment to effective rehabilitation? A well-organised system with defined roles and easy referral to various elements of rehabilitation (specialised physiotherapy, social counselling, psychological advice etc.) may be of importance for the effect of a GP intervention. To improve rehabilitation it may also be important to develop screening tools that support identification of patients with special needs. Initiatives supporting the GPs in undertaking a proactive role for patients with special needs should be considered. The effect of interventions should, however, be carefully evaluated in order to ensure efficient use of resources before implementation.

Figure 1. Study flow.

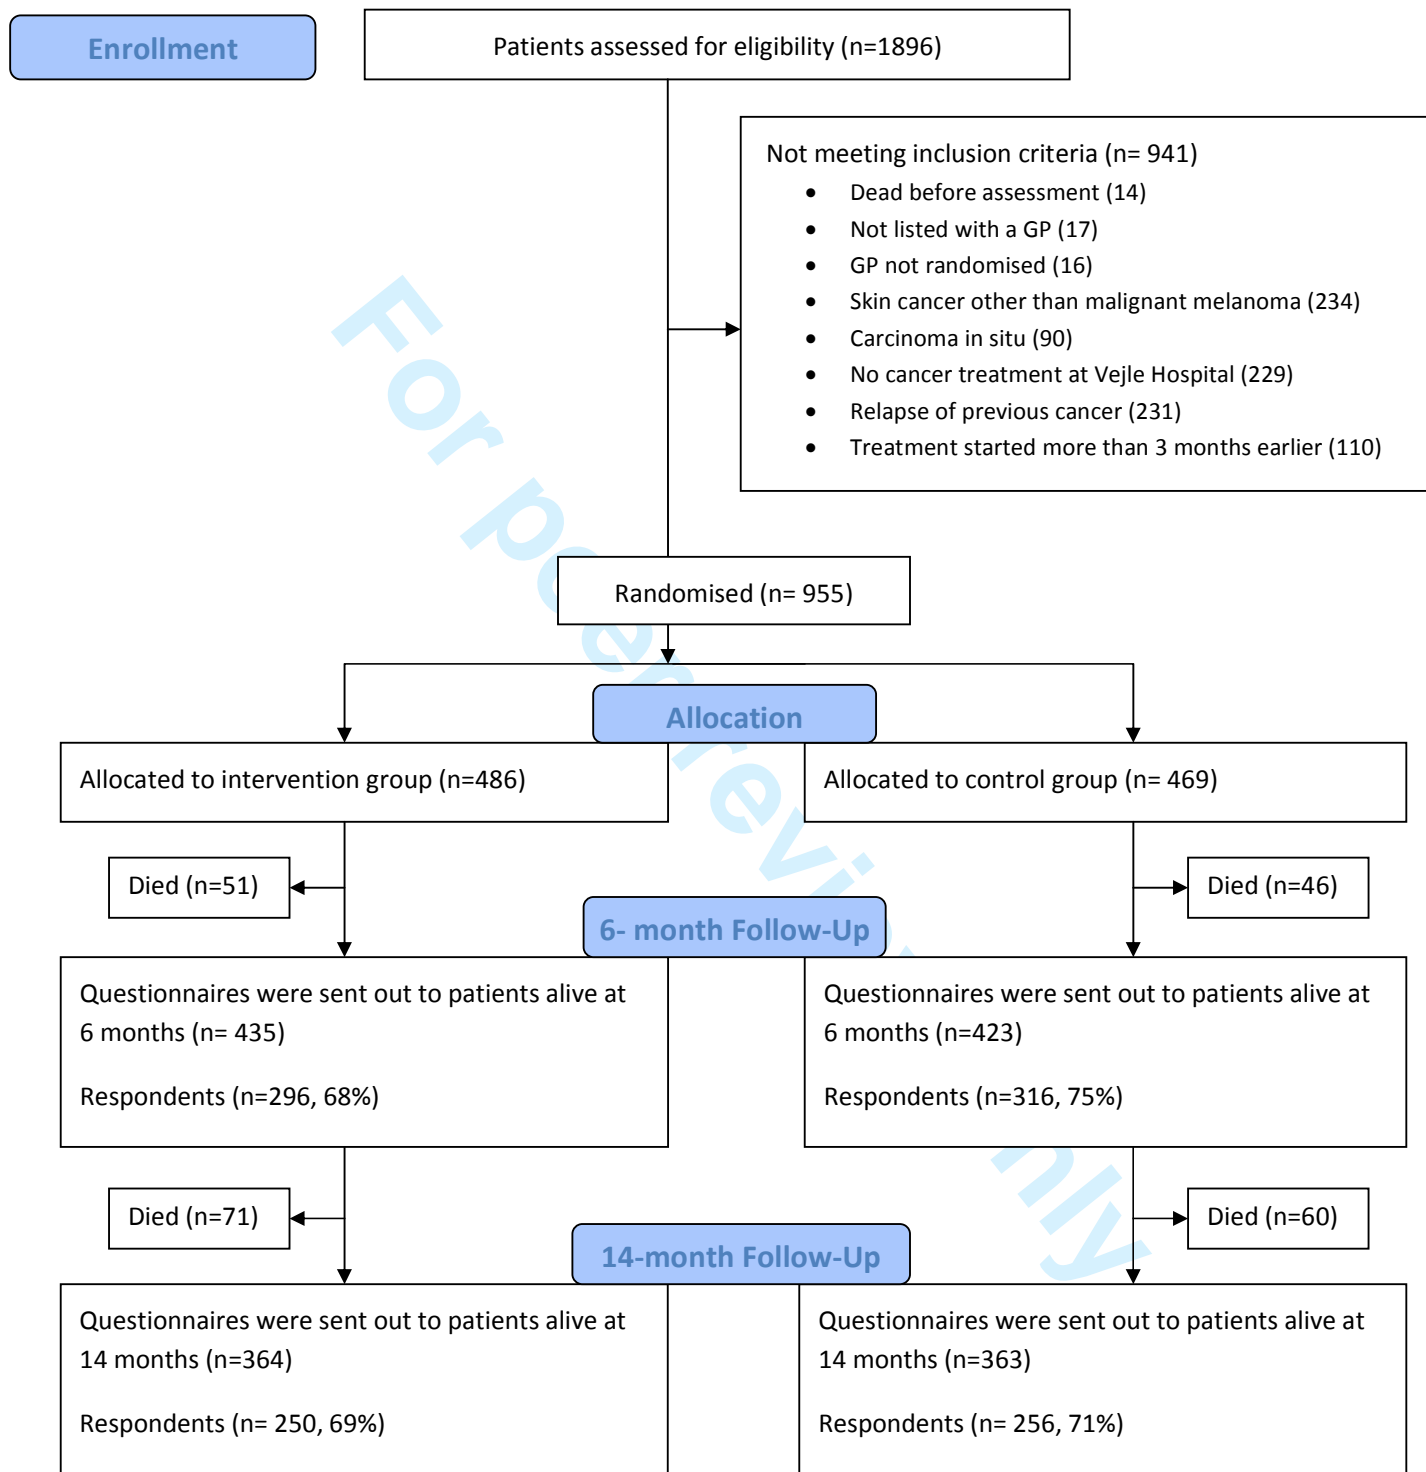

Figure 2. General needs and problems among cancer patients.

|                     |                                                                                                                                                                                                                                                                                                                                                                                                                                                                                                                                          |
|---------------------|------------------------------------------------------------------------------------------------------------------------------------------------------------------------------------------------------------------------------------------------------------------------------------------------------------------------------------------------------------------------------------------------------------------------------------------------------------------------------------------------------------------------------------------|
| Psychological level | <ul style="list-style-type: none"> <li>• Fear of death or recurrence</li> <li>• Guilt feelings about being sick</li> <li>• Anger at general practitioner or “system” for not having taken action soon enough</li> <li>• Troubles adjusting to new self-image</li> <li>• Sense of being left in limbo after discharge from the hospital</li> <li>• Risk of developing depression</li> <li>• Reconsiderations about priorities in life and how one wants to live life with or after a cancer disease</li> <li>• Sexual problems</li> </ul> |
| Social level        | <ul style="list-style-type: none"> <li>• Concerns about the well-being of spouse, children and other relatives</li> <li>• Changed body image or sexuality</li> <li>• Changed position/status in marriage, in family, at work, etc.</li> <li>• Concerns about possible infertility caused by treatment</li> <li>• Information about patient associations and similar groups for patients and relatives</li> </ul>                                                                                                                         |
| Physical level      | <ul style="list-style-type: none"> <li>• Physical capacity according to daily activities, need for special facilities, homecare, conversions of the home, etc.</li> <li>• Need for dietary advice, e.g. to prevent undue weight loss</li> <li>• Support in order to accept physical changes and late complications like tiredness, amputation, infertility, pain, etc.</li> </ul>                                                                                                                                                        |
| Work-related level  | <ul style="list-style-type: none"> <li>• Concerns about losing one’s job</li> <li>• Concerns about having to give up one’s former responsibilities or change field of work due to reduced ability to work</li> <li>• Opportunities for financial support during sick-leave, flexible job, etc.</li> <li>• Support to keep in contact with workplace during sick-leave</li> </ul>                                                                                                                                                         |
| Financial level     | <ul style="list-style-type: none"> <li>• Social rights like mileage allowances, reimbursement of assistive technology, etc.</li> <li>• Concerns about a decrease in income and consequences hereof in relation to housing, spouse, children, etc.</li> <li>• Conditions regarding pension or incapacity benefit</li> </ul>                                                                                                                                                                                                               |



Table 1. Baseline demographic and medical characteristics for all included patients (n=955).

| <b>Demographic characteristics</b> | Control group<br>(n=469) | Intervention group<br>(n=486) |
|------------------------------------|--------------------------|-------------------------------|
| Age, years                         |                          |                               |
| Mean (CI)                          | 63.6 (62.5 to 64.6)      | 63.2 (62.2 to 64.3)           |
| Median                             | 64                       | 64                            |
| Range                              | 21 to 98                 | 28 to 92                      |
| Sex                                |                          |                               |
| Male (%)                           | 134 (28.6)               | 133 (27.4)                    |
| Female (%)                         | 335 (71.4)               | 353 (72.6)                    |
| <b>Cancer type</b>                 | Numbers (%)              | Numbers (%)                   |
| Cancer of breast                   | 206 (43.9)               | 201 (41.4)                    |
| Cancer of lung                     | 69 (14.7)                | 75 (15.4)                     |
| Malignant melanoma                 | 44 (9.4)                 | 35 (7.2)                      |
| Cancer of rectum/anus              | 33 (7.0)                 | 45 (9.3)                      |
| Cancer of colon                    | 29 (6.2)                 | 39 (8.0)                      |
| Cancer of ovaries                  | 12 (2.6)                 | 9 (1.9)                       |
| Cancer of biliary system           | 7 (1.5)                  | 8 (1.6)                       |
| Cancer of brain                    | 6 (1.3)                  | 8 (1.6)                       |
| Cancer of prostate                 | 8 (1.7)                  | 3 (0.6)                       |
| Cancer of corpus uteri             | 6 (1.3)                  | 5 (1.0)                       |
| Myelomatosis                       | 6 (1.3)                  | 5 (1.0)                       |
| Lymphoma                           | 3 (0.6)                  | 4 (0.8)                       |
| Unspecified location               | 16 (3.4)                 | 16 (3.3)                      |
| Other diagnoses                    | 24 (5.1)                 | 33 (6.8)                      |

Table 2. Health-Related Quality of Life (EORTC QLQ-C30) outcome variables and mean differences at 6 and 14 months (95% confidence intervals).

| Outcome variable         | 6 months |                     |                          |      | 14 months |                     |                          |      |
|--------------------------|----------|---------------------|--------------------------|------|-----------|---------------------|--------------------------|------|
|                          | n        | Mean (CI)           | Mean difference (95% CI) | P    | n         | Mean (CI)           | Mean difference (95% CI) | P    |
| Global Health Status/qol |          |                     |                          |      |           |                     |                          |      |
| Control group            | 297      | 68.0 (65.5 to 70.5) |                          |      | 246       | 72.8 (70.3 to 75.3) |                          |      |
| Intervention group       | 281      | 69.3 (66.7 to 71.9) | 1.25 (-2.4 to 4.9)       | 0.50 | 240       | 72.1 (69.6 to 74.7) | -0.71 (-4.3 to 2.8)      | 0.69 |
| Physical functioning     |          |                     |                          |      |           |                     |                          |      |
| Control group            | 294      | 79.0 (76.4 to 81.5) |                          |      | 240       | 81.9 (79.3 to 84.5) |                          |      |
| Intervention group       | 280      | 79.7(77.1 to 82.4)  | 0.77 (-2.9 to 4.4)       | 0.68 | 234       | 82.0 (79.4 to 84.6) | -0.08 (-3.6 to 3.8)      | 0.97 |
| Role functioning         |          |                     |                          |      |           |                     |                          |      |
| Control group            | 291      | 71.3 (67.7 to 74.9) |                          |      | 239       | 78.0 (74.4 to 81.7) |                          |      |
| Intervention group       | 277      | 72.5 (68.8 to 76.1) | 1.18 (-3.9 to 6.3)       | 0.65 | 235       | 78.8 (75.0 to 82.5) | 0.70 (-4.5 to 5.9)       | 0.79 |
| Emotional functioning    |          |                     |                          |      |           |                     |                          |      |
| Control group            | 293      | 80.5 (78.1 to 83.0) |                          |      | 240       | 80.7 (77.9 to 83.4) |                          |      |
| Intervention group       | 278      | 81.6 (79.1 to 84.1) | 1.02 (-2.5 to 4.5)       | 0.57 | 238       | 80.8 (78.0 to 83.6) | 0.12 (-3.8 to 4.1)       | 0.95 |
| Cognitive functioning    |          |                     |                          |      |           |                     |                          |      |
| Control group            | 290      | 83.0 (80.5 to 85.5) |                          |      | 245       | 82.6 (79.7 to 85.5) |                          |      |
| Intervention group       | 278      | 83.9 (81.3 to 86.4) | 0.88 (-2.7 to 4.5)       | 0.63 | 238       | 85.1 (82.1 to 88.2) | 2.53 (-1.7 to 6.7)       | 0.24 |
| Social functioning       |          |                     |                          |      |           |                     |                          |      |
| Control group            | 295      | 85.7 (83.0 to 88.4) |                          |      | 242       | 88.2 (85.4 to 91.0) |                          |      |
| Intervention group       | 280      | 86.0 (83.2 to 88.8) | 0.28 (-3.6 to 4.2)       | 0.89 | 238       | 87.4 (84.6 to 90.3) | -0.77 (-4.8 to 3.2)      | 0.71 |
| Fatigue                  |          |                     |                          |      |           |                     |                          |      |
| Control group            | 292      | 37.4 (34.3 to 40.6) |                          |      | 244       | 32.1 (28.8 to 35.3) |                          |      |
| Intervention group       | 279      | 34.2 (30.9 to 37.4) | -3.27 (-7.8 to 1.3)      | 0.16 | 234       | 32.3 (28.9 to 35.6) | 0.23 (-4.5 to 4.9)       | 0.92 |
| Nausea and vomiting      |          |                     |                          |      |           |                     |                          |      |
| Control group            | 300      | 8.1 (6.1 to 10.0)   |                          |      | 244       | 5.5 (3.9 to 7.2)    |                          |      |
| Intervention group       | 284      | 8.0 (6.0 to 10.0)   | -0.11 (-2.9 to 2.7)      | 0.94 | 236       | 5.6 (3.9 to 7.3)    | 0.05 (-2.3 to 2.4)       | 0.97 |
| Pain                     |          |                     |                          |      |           |                     |                          |      |
| Control group            | 283      | 23.0 (19.8 to 26.2) |                          |      | 241       | 21.9 (18.5 to 25.4) |                          |      |
| Intervention group       | 274      | 22.0 (18.8 to 25.3) | -0.95 (-5.5 to 3.6)      | 0.68 | 234       | 21.4 (17.8 to 24.9) | -0.56 (-5.5 to 4.4)      | 0.83 |
| Dyspnoea                 |          |                     |                          |      |           |                     |                          |      |
| Control group            | 297      | 17.0 (13.9 to 20.2) |                          |      | 245       | 13.2 (10.0 to 16.5) |                          |      |
| Intervention group       | 286      | 17.9 (14.7 to 21.2) | 0.87 (-3.6 to 5.4)       | 0.71 | 233       | 15.4 (11.9 to 18.8) | 2.11 (-2.6 to 6.8)       | 0.38 |
| Insomnia                 |          |                     |                          |      |           |                     |                          |      |
| Control group            | 302      | 27.5 (24.0 to 31.0) |                          |      | 248       | 29.6 (25.6 to 33.6) |                          |      |
| Intervention group       | 285      | 27.3 (23.6 to 30.9) | -0.23 (-5.3 to 4.8)      | 0.93 | 240       | 28.5 (24.4 to 32.6) | -1.08 (-6.8 to 4.6)      | 0.71 |
| Appetite loss            |          |                     |                          |      |           |                     |                          |      |
| Control group            | 301      | 14.1 (11.0 to 17.2) |                          |      | 246       | 9.6 (7.1 to 12.2)   |                          |      |
| Intervention group       | 288      | 15.9 (12.7 to 19.0) | 1.79 (-2.7 to 6.2)       | 0.43 | 239       | 7.9 (5.4 to 10.5)   | -1.67 (-5.3 to 2.0)      | 0.37 |
| Constipation             |          |                     |                          |      |           |                     |                          |      |
| Control group            | 299      | 12.6 (9.7 to 15.5)  |                          |      | 248       | 11.9 (9.0 to 14.9)  |                          |      |
| Intervention group       | 284      | 11.3 (8.3 to 14.2)  | -1.33 (-5.4 to 2.8)      | 0.53 | 236       | 8.9 (5.9 to 11.9)   | -3.03 (-7.4 to 1.1)      | 0.16 |
| Diarrhoea                |          |                     |                          |      |           |                     |                          |      |
| Control group            | 299      | 11.3 (8.8 to 13.9)  |                          |      | 250       | 11.4 (8.5 to 14.2)  |                          |      |
| Intervention group       | 284      | 11.4 (8.8 to 14.1)  | 0.08 (-3.6 to 3.8)       | 0.97 | 238       | 10.0 (7.0 to 13.0)  | -1.38 (-5.5 to 2.8)      | 0.51 |
| Financial difficulties   |          |                     |                          |      |           |                     |                          |      |
| Control group            | 297      | 7.6 (5.4 to 9.8)    |                          |      | 242       | 6.5 (3.9 to 9.0)    |                          |      |
| Intervention group       | 284      | 8.0 (5.7 to 10.2)   | 0.34 (-2.8 to 3.5)       | 0.83 | 236       | 6.7 (4.1 to 9.4)    | 0.27 (-3.4 to 4.0)       | 0.89 |

Mean values from 0 to 100. A score of 100 indicates optimal function or maximum symptom intensity (i.e. for functional measures, an increase indicates improvement, while for symptoms, an increase indicates worsening)

Table 3. Psychological distress (POMS) at 14 months and mean differences between groups (95 confidence intervals).

| Outcome variable       | n   | Mean range | Mean (95% CI)         | Mean difference (95% CI) | P    |
|------------------------|-----|------------|-----------------------|--------------------------|------|
| Anger/hostility        |     | 0 to 28    |                       |                          |      |
| Control group          | 223 |            | 2.03 (1.59 to 2.48)   |                          |      |
| Intervention group     | 230 |            | 1.88 (1.43 to 2.33)   | -0.15 (-0.79 to 0.48)    | 0.64 |
| Confusion/bewilderment |     | 0 to 20    |                       |                          |      |
| Control group          | 229 |            | 2.45 (2.04 to 2.86)   |                          |      |
| Intervention group     | 231 |            | 2.11 (1.69 to 2.53)   | -0.34 (-0.92 to 0.25)    | 0.26 |
| Depression/dejection   |     | 0 to 32    |                       |                          |      |
| Control group          | 223 |            | 3.85 (3.20 to 4.51)   |                          |      |
| Intervention group     | 229 |            | 3.26 (2.61 to 3.92)   | -0.59 (-1.52 to 0.34)    | 0.21 |
| Fatigue/inertia        |     | 0 to 20    |                       |                          |      |
| Control group          | 226 |            | 4.65 (4.08 to 5.22)   |                          |      |
| Intervention group     | 234 |            | 4.14 (3.02 to 4.10)   | -0.51 (-1.32 to 0.29)    | 0.21 |
| Tension/anxiety        |     | 0 to 24    |                       |                          |      |
| Control group          | 226 |            | 3.82 (3.28 to 4.36)   |                          |      |
| Intervention group     | 233 |            | 3.56 (3.02 to 4.10)   | -0.26 (-1.02 to 0.50)    | 0.50 |
| Vigour/activity        |     | 0 to 24    |                       |                          |      |
| Control group          | 218 |            | 10.28 (9.51 to 11.05) |                          |      |
| Intervention group     | 228 |            | 10.09 (9.31 to 10.86) | -0.20 (-1.29 to 0.89)    | 0.72 |
| Total mood disturbance |     | 0 to 124   |                       |                          |      |
| Control group          | 200 |            | 4.87 (2.29 to 7.45)   |                          |      |
| Intervention group     | 210 |            | 4.19 (1.62 to 6.76)   | -0.68 (-4.32 to 2.97)    | 0.72 |

Mean values of each subscale depends on the number of items related to the individual subscale which varies from 5 to 8, each item ranging from 0 to 4. Total mood disturbance is calculated by summing up the scores on the five negative symptom subscales and subtracting the score on the one positively scored subscale, vigour/activity. A higher score indicates a higher degree of symptoms/feelings within the related subscale.

## Contributors

SHB, JK, JS and DGH contributed to conception and study design. SHB, DGH, JK and JS obtained the funding. SHB, JK, JS and DGH wrote the protocol. SHB and DGH were responsible for recruitment of patients. SHB collected and managed the data. PVL was the study statistician. SHB and PVL performed the statistical analysis. SHB, PVL, JK, JS and DGH contributed to the interpretation of data. SHB drafted the first version of the manuscript. SHB, JK, JS, PVL and DGH critically reviewed, revised, and supplemented the manuscript. All authors approved the final version. SHB is the guarantor.

## Licence for publication

The Corresponding Author has the right to grant on behalf of all authors and does grant on behalf of all authors, an exclusive licence (or non exclusive for government employees) on a worldwide basis to the BMJ Publishing Group Ltd and its licensees, to permit this article (if accepted) to be published in BMJ editions and any other BMJPG products and to exploit all subsidiary rights, as set out in our licence (<http://resources.bmj.com/bmj/authors/checklists-forms/licence-for-publication>).

## Funding

This study was funded by the Danish Cancer Society, the Novo Nordisk Foundation and the Region of Southern Denmark. The National Research Center for Cancer Rehabilitation is funded by the Danish Cancer Society. The authors' work was independent from the funders.

## Competing interests

All authors have completed the ICMJE uniform disclosure form at [www.icmje.org/coi\\_disclosure.pdf](http://www.icmje.org/coi_disclosure.pdf) and declare: no support from any organisation for the submitted

21 Enhanced involvement of general practitioners in cancer rehabilitation: a RCT, February 2012, Stinne Holm Bergholdt  
1 work; no financial relationships with any organisations that might have an interest in the submitted  
2  
3 work in the previous 3 years; no other relationships or activities that could appear to have  
4  
5 influenced the submitted work.  
6  
7  
8  
9  
10

## 11 Ethical approval

12  
13  
14  
15 The study was approved by the Danish Data Protection Agency. The Regional Committee on  
16  
17 Biomedical Research Ethics evaluated the project and concluded that the intervention did not  
18  
19 need an approval from the Danish National Committee on Biomedical Research Ethics according  
20  
21 to Danish law (Project-ID: S-20082000-7).  
22  
23  
24  
25

## 26 Data

27  
28 All authors had full access to all of the data in the study and can take responsibility for the integrity  
29  
30 of the data and the accuracy of the data analysis.  
31  
32  
33  
34  
35

## 36 Data sharing

37  
38 No additional data available.  
39  
40  
41

## 42 Acknowledgement

43  
44  
45 The authors wish to thank all patients and health care professionals who took part in the study. We  
46  
47 also wish to thank Lise Keller Stark, Research Unit of General Practice, University of Southern  
48  
49 Denmark, for proofreading the manuscript and Susanne Døssing Berntsen for managing datasets.  
50  
51  
52  
53  
54  
55  
56  
57  
58  
59  
60

## References

- (1) Mikkelsen TH, Sondergaard J, Jensen AB, Olesen F. Cancer rehabilitation: psychosocial rehabilitation needs after discharge from hospital? *Scand J Prim Health Care* 2008;26:216-21.
- (2) Hewitt M, Greenfield S, Stovall E. *From Cancer Patient to Cancer Survivor: Lost in Transition*. The National Academies Press, Washington, D.C.: Committee on Cancer Survivorship. Improving Care and Quality of Life, National Cancer Policy Board, Institute of Medicine, and National Research Council; 2006.
- (3) Groenvold M, Pedersen C, Jensen CR, Faber MT, Johnsen AT. *The cancer patient's world-an investigation of the problems experienced by Danish cancer patients*. Danish Cancer Society, Copenhagen 2006 [in Danish].
- (4) Schmid-Buchi S, Halfens RJ, Dassen T, van den Borne B. Psychosocial problems and needs of posttreatment patients with breast cancer and their relatives. *Eur J Oncol Nurs* 2010; Jan 18. DOI:10.1016/j.ejon.2009.11.001.
- (5) Steele R, Fitch MI. Supportive care needs of patients with lung cancer. *Can Oncol Nurs J* 2010;20(1):15-22.
- (6) Steele R, Fitch MI. Supportive care needs of women with gynaecological cancer. *Cancer Nurs* 2008;31:284-91.
- (7) Armes J, Crowe M, Colbourne L, Morgan H, Murrels T, Oakley C, Palmer N, Ream E, Young A, Richardson A. Patients' supportive care needs beyond the end of cancer treatment: a prospective, longitudinal survey. *J Clin Oncol* 2009;27:6172-9.
- (8) McDowell ME, Occhipinti S, Ferguson M, Dunn J, Chambers SK. Predictors of change in unmet supportive care needs in cancer. *Psycho-Oncology* 2010;19:508-16.
- (9) World Health Organisation [internet] at <http://www.who.int/topics/rehabilitation/en>. Accessed on November 18, 2011.

- 23 Enhanced involvement of general practitioners in cancer rehabilitation: a RCT, February 2012, Stinne Holm Bergholdt
- 1 (10) Jones R, Regan M, Ristevski E, Breen S. Patients' perception of communication with  
2 clinicians during screening and discussion of cancer supportive care needs. Patient Educ  
3 Couns 2011. Jan 18. DOI: 10.1016/j.pec.2010.12.006.  
4
  - 5 (11) Earle CC. Failing to plan is planning to fail: improving the quality of care with survivorship  
6 care plans. J Clin Oncol 2006;24:5112-6.  
7
  - 8 (12) Gilbert SM, Miller DC, Hollenbeck BK, Montie JE, Wei JT. Cancer survivorship: challenges  
9 and changing paradigms. J Urol 2008;179:431-8.  
10
  - 11 (13) Houlihan NG. Transitioning to cancer survivorship: plans of care. Oncology 2009;23(8  
12 Suppl):42-8.  
13
  - 14 (14) Olesen F, Dickinson J, Hjortdahl P. General practice- time for a new definition. BMJ  
15 2000;320:354-7.  
16
  - 17 (15) Grunfeld E, Earle CC. The interface between primary and oncology specialty care:  
18 Treatment through survivorship. J Natl Cancer Inst Monogr 2010;2010(40):25-30.  
19
  - 20 (16) Smith SM, Allwright S, O'Dowd T. Does sharing care across the primary-specialty interface  
21 improve outcomes in chronic disease? A systematic review. Am J Manag Care  
22 2008;14:213-24.  
23
  - 24 (17) Nielsen JD, Palshof T, Mainz J, Jensen AB, Olesen F. Randomised controlled trial of a  
25 shared care programme for newly referred cancer patients: bridging the gap between  
26 general practice and hospital. Qual Saf Health Care 2003;12:263-72.  
27
  - 28 (18) Grunfeld E. Primary care physicians and oncologists are players on the same team. J Clin  
29 Oncol 2008;26:2246-7.  
30
  - 31 (19) Grunfeld E. Cancer survivorship: a challenge for primary care physicians. Br J Gen Pract  
32 2005;55:741-2.  
33
  - 34 (20) Johansson B, Berglund G, Hoffman K, Glimelius B, Sjoden PO. The role of the general  
35 practitioner in cancer care and the effect of an extended information routine. Scand J Prim  
36 Health Care 2000;18:143-8.  
37  
38  
39  
40  
41  
42  
43  
44  
45  
46  
47  
48  
49  
50  
51  
52  
53  
54  
55  
56  
57  
58  
59  
60

- 24 Enhanced involvement of general practitioners in cancer rehabilitation: a RCT, February 2012, Stinne Holm Bergholdt
- 1  
2  
3  
4  
5  
6  
7  
8  
9  
10  
11  
12  
13  
14  
15  
16  
17  
18  
19  
20  
21  
22  
23  
24  
25  
26  
27  
28  
29  
30  
31  
32  
33  
34  
35  
36  
37  
38  
39  
40  
41  
42  
43  
44  
45  
46  
47  
48  
49  
50  
51  
52  
53  
54  
55  
56  
57  
58  
59  
60
- (21) Kendall M, Boyd K, Campbell C, Cormie P, Fife S, Thomas K, et al. How do people with cancer wish to be cared for in primary care? Serial discussion groups of patients and carers. *Fam Pract* 2006;23:644-50.
- (22) Anvik T, Holtedahl KA, Mikalsen H. "When patients have cancer, they stop seeing me"--the role of the general practitioner in early follow-up of patients with cancer--a qualitative study. *BMC Fam Pract* 2006;7:19.
- (23) Bulsara C, Ward AM, Joske D. Patient perceptions of the GP role in cancer management. *Aust Fam Physician* 2005;34:299-300,302.
- (24) Mikkelsen TH. PhD-thesis: Cancer rehabilitation in Denmark – with particular focus on the present and future role of general practice. Faculty of Health Sciences, University of Aarhus, Denmark, 2009. ISBN 978-87-90004-09-5.
- (25) Kendall M, Boyd K, Campbell C, Cormie P, Fife S, Thomas K, et al. How do people with cancer wish to be cared for in primary care? Serial discussion groups of patients and carers. *Fam Pract* 2006;23:644-50.
- (26) Hansen DG, Bergholdt SH, Holm L, Kragstrup J, Bladt T, Søndergaard J. A complex intervention to enhance the involvement of general practitioners in cancer rehabilitation. Protocol for a randomised controlled trial and feasibility study of a multimodal intervention. *Acta Oncol* 2011;50:299-306.
- (27) Source: [www.regionsyddanmark.dk](http://www.regionsyddanmark.dk); 2009.
- (28) PLO Praksistælling [General Practitioners' Organisation Practice Count] Copenhagen, 2009.
- (29) Kurtz SM, Silverman JD. The Calgary-Cambridge Referenced Observation Guides: an aid to defining the curriculum and organizing the teaching in communication training programmes. *Med Educ* 1996;30:83-9.
- (30) Mikkelsen T, Søndergaard J, Sokolowski I, Jensen A, Olesen F. Cancer survivors' rehabilitation needs in a primary health care context. *Fam Pract* 2009;26:221-30.



- 25 Enhanced involvement of general practitioners in cancer rehabilitation: a RCT, February 2012, Stinne Holm Bergholdt
- 1  
2  
3  
4  
5  
6  
7  
8  
9  
10  
11  
12  
13  
14  
15  
16  
17  
18  
19  
20  
21  
22  
23  
24  
25  
26  
27  
28  
29  
30  
31  
32  
33  
34  
35  
36  
37  
38  
39  
40  
41  
42  
43  
44  
45  
46  
47  
48  
49  
50  
51  
52  
53  
54  
55  
56  
57  
58  
59  
60
- (31) Aaronson NK, Ahmedzai S, Bergman B, Bullinger M, Cull A, Duez NJ, et al. The European Organization for Research and Treatment of Cancer QLQ-C30: a quality-of-life instrument for use in international clinical trials in oncology. *J Natl Cancer Inst* 1993;85:365-76.
- (32) Groenvold M, Klee MC, Sprangers MA, Aaronson NK. Validation of the EORTC QLQ-C30 quality of life questionnaire through combined qualitative and quantitative assessment of patient-observer agreement. *J Clin Epidemiol* 1997;50:441-50.
- (33) Baker F, Denniston M, Zabora J, Polland A, Dudley WN. A POMS short form for cancer patients: psychometric and structural evaluation. *Psycho-Oncology* 2002;11:273-81.
- (34) Scott NW, Fayers PM, Aaronson NK, Bottomley A, de Graeff A, Groenvold M, Gundy C, Koller M, Petersen MA, Sprangers MAG. EORTC QLQ-C30 Reference Values Manual. EORTC Quality of Life Group 2008.
- (35) Cocks K, King MT, Velikova G, St-James MM, Fayers P, Brown J. Evidence-based guidelines for determination of sample size and interpretation of the European Organisation for the Research and Treatment of cancer Quality of Life Questionnaire Core 30. *J Clin Oncol* 2010;29:89-96. DOI: 10.1200/JCO.2010.28.0107.
- (36) Høltedahl K, Norum J, Anvik T, Richardsen E. Do cancer patients benefit from short-term contact with a general practitioner following cancer treatment? A randomised, controlled study. *Support Care Cancer* 2005;13:949-956.
- (37) Johansson B, Brandberg Y, Hellbom M, Persson C, Petersson LM, Berglund G, Glimelius B. Health-related quality of life and distress in cancer patients: results from a large randomised study. *Br J Cancer* 2008;99:1975-83.
- (38) Lewis RA, Neal RD, Williams NH, France B, Hendry M, Russell D, Hughes DA, Russell I, Stuart NS, Weller D, Wilkinson C. Follow-up of cancer in primary care versus secondary care: systematic review. *Br J Gen Pract* 2009 Jul;59(564):e234-47.
- (39) Aranda S, Schofield P, Weih L, Milne D, Yates P, Faulkner R. Meeting the support and information needs of women with advanced breast cancer: a randomised controlled trial. *Br J Cancer* 2006;95:667-73.

- 26 Enhanced involvement of general practitioners in cancer rehabilitation: a RCT, February 2012, Stinne Holm Bergholdt
- 1  
2  
3  
4  
5  
6  
7  
8  
9  
10  
11  
12  
13  
14  
15  
16  
17  
18  
19  
20  
21  
22  
23  
24  
25  
26  
27  
28  
29  
30  
31  
32  
33  
34  
35  
36  
37  
38  
39  
40  
41  
42  
43  
44  
45  
46  
47  
48  
49  
50  
51  
52  
53  
54  
55  
56  
57  
58  
59  
60
- (40) Rottmann N, Dalton SO, Bidstrup PE, Würtzen H, Høybye MT, Ross L, Christensen J, Frederiksen K, Hansen DG, Johansen C. No improvement in distress and quality of life following psychosocial cancer rehabilitation. A randomised trial. *Psycho-Oncology* 2011;Feb. 8. DOI: 10.1002/pon.1924.
- (41) Ross L, Boesen EH, Dalton SO, Johansen C. Mind and cancer: does psychosocial intervention improve survival and psychological well-being? *Eur J Cancer* 2002;38;1447-57.
- (42) Fors EA, Bertheussen GF, Thune I, Juvet LK, Elvsaa IK, Oldervoll L, Anker G, Falkmer U, Lundgren S, Leivseth G. Psychosocial interventions as part of breast cancer rehabilitation programs? Results from a systematic review. *Psycho-Oncology* 2010; Sep 6. DOI: 10.1002/pon.1844
- (43) Newell SA, Sanson-Fisher RW, Savolainen NJ. Systematic review of psychological therapies for cancer Patients: overview and recommendations for future research. *J Natl Cancer Inst* 2002;94:558-84.
- (44) Uitterhoeve RJ, Vernooij M, Litjens M, Potting K, Bensing J, De Mulder P, Achterberg T van. Psychosocial interventions for patients with advanced cancer- a systematic review of the literature. *Br J Cancer* 2004;91:1050-62.

## Enhanced involvement of general practitioners in cancer rehabilitation: a randomised controlled trial.

Stinne Holm Bergholdt, MD, PhD fellow<sup>1§</sup>, Pia Veldt Larsen, statistician<sup>1</sup>, Jakob Kragstrup, professor<sup>1</sup>, Jens Søndergaard, professor<sup>1</sup>, Dorte Gilså Hansen, assistant professor<sup>1</sup>

<sup>1</sup> National Research Centre for Cancer Rehabilitation, Research Unit of General Practice, University of Southern Denmark, J. B. Winsløws Vej 9B, 5000 Odense C, Denmark

§ Correspondence to:

SH Bergholdt, sbergholdt@health.sdu.dk

Keywords: Cancer, rehabilitation, general practice, quality of life, general practitioners

Words: 2531

## Abstract

Objective: To test the hypothesis that a multimodal intervention giving the general practitioner (GP) an enhanced role in cancer rehabilitation improves patients' health-related quality of life and psychological distress.

Design: Cluster randomised controlled trial. All general practices in Denmark were randomised to an intervention group or to a control group. Patients were subsequently allocated to intervention or control (usual procedures) based on the randomisation status of their GP.

Setting: All clinical departments at a public regional hospital treating cancer patients and all general practices in Denmark.

Participants: Adult patients treated for incident cancer at Vejle Hospital, Denmark, between 12 May 2008 and 28 February 2009. A total of 955 patients (486 to intervention, 469 to control group) registered with 323 general practices were included.

Intervention: The intervention included an interview about rehabilitation needs with a rehabilitation coordinator at the regional hospital, information from the hospital to the GP about individual needs for rehabilitation and an encouragement of the GP to contact the patient to offer his support with rehabilitation.

Main outcome measures: The primary outcome was health-related quality of life measured 6 months after inclusion using the European Organisation for the Research and Treatment of Cancer Quality of Life Questionnaire Core 30 (EORTC QLQ-C30). Secondary outcomes included quality of life at 14 months and additional subscales of the EORTC QLQ-C30 at 6 and 14 months, and psychological distress at 14 months using the Profile of Mood States (POMS) scale.

1  
2  
3  
4 Results: No effect of the intervention was observed on primary and/or secondary  
5  
6 outcomes after 6 and 14 months.  
7

8  
9 Conclusion: A multimodal intervention aiming to give the GP an enhanced role in cancer  
10  
11 patients' rehabilitation did not improve quality of life or psychological distress.  
12

13 Trial registration: ClinicalTrials.gov, registration ID number NCT01021371.  
14  
15  
16  
17  
18  
19  
20  
21  
22  
23  
24  
25  
26  
27  
28  
29  
30  
31  
32  
33  
34  
35  
36  
37  
38  
39  
40  
41  
42  
43  
44  
45  
46  
47  
48  
49  
50  
51  
52  
53  
54  
55  
56  
57  
58  
59  
60

## Background

Addressing the unmet needs of individual rehabilitation of cancer patients is paramount (1-4). The underlying problems are often psychological or social and many persist after treatment or emerge late in the illness continuum (5-8). Rehabilitation is defined by WHO as “a process intended to enable people with disabilities to reach and maintain optimal physical, sensory, intellectual, psychological and/or social function” (9) which is the conceptual frame for this study. Hence, rehabilitation is a complex and long-lasting process, but evidence on how and when to identify the patients’ needs, what initiatives to offer, and how to manage the efforts is sparse (2;10-13).

General practice is characterised by continuity with frequent encounters with each patient, covering wide-ranging issues (14). Hence, general practitioners (GPs) generally have profound knowledge about the patients’ prior health status, mental vulnerability and social network. General practice may, therefore, be able to initiate the rehabilitation process and take on the task of coordinating or providing the rehabilitation services needed, but currently the role of GPs is not well-defined (15-23). Studies do, however, show that GPs are willing to undertake these tasks and that the patients wish that their GPs were more proactive in doing so (24-25).

The objective of this trial was to investigate the effect of a multimodal intervention giving the GP an enhanced role in improving patients’ health-related quality of life and psychological distress following cancer. To validate our results we conducted subgroup analyses of the large and homogeneous group of breast cancer patients.

## Material and methods

We conducted a cluster randomised, controlled trial where all general practices in Denmark were randomised to an intervention group or to a control group **by means of the unique provider number of each practice**. Patients were subsequently allocated according to the randomisation of their GP. Feasibility of the intervention and the study details have previously been published (26).

### *Participants*

All adult patients ( $\geq 18$  years) newly diagnosed with cancer and admitted to Vejle Hospital between 12 May 2008 and 28 February 2009 were assessed for eligibility. Patients were included if treated at Vejle Hospital for a cancer diagnosed within the last 3 months and if listed with a general practice. Patients with carcinoma in situ or non-melanoma skin cancers were not included (Figure 1).

Two rehabilitation coordinators, both nurses with oncological experience, assessed all patients for eligibility and managed the intervention. The patients were sampled across departments, type of cancer, stage, and potential rehabilitation needs by use of the electronic patient files (26).

### *Setting*

The study was conducted at Vejle Hospital, a public general hospital in the region of Southern Denmark (1.2 million inhabitants) (27). Cancer patients were allocated from all of Denmark.

The Danish publicly funded healthcare system ensures free access to general practice which is responsible for primary care needs, and GPs function as gatekeepers to

1  
2  
3  
4 the rest of the healthcare system. More than 98% of all Danish residents are registered  
5  
6 with a general practice. On average each GP meets 9 incident cancer patients during one  
7  
8 year (28).  
9

10  
11 GPs' opportunities to refer patients to relevant rehabilitation services vary between  
12  
13 the different municipalities, just as the availability of private patient associations and other  
14  
15 relief organisations. These conditions might influence the quality of the rehabilitation  
16  
17 interventions offered.  
18  
19

### 20 21 *The intervention*

22  
23 The intervention comprised a patient interview about rehabilitation needs performed by the  
24  
25 rehabilitation coordinators, followed by information to the GP about the patient's individual  
26  
27 rehabilitation needs and cancer patients' rehabilitation needs in general. The core of the  
28  
29 information was that the GP was encouraged to contact the patient to facilitate a  
30  
31 rehabilitation process (Figure 2).  
32  
33

34  
35 The patient interviews were conducted according to an interview guide (29) and  
36  
37 based on a checklist of general needs and problems among cancer patients (Figure 2).  
38  
39 Interviews were most often conducted at the hospital, but in some cases by phone. During  
40  
41 the interview, the concept of rehabilitation was explained and the individual needs for  
42  
43 physical, psychological, sexual, social, work- and economy-related rehabilitation were  
44  
45 identified. It was explained that physical, psychological, sexual, social, work-related and  
46  
47 financial issues (1-4;30) might occur at any time and change during the disease trajectory  
48  
49 (7-8). In order to address these problems, patients were advised to consult their GP during  
50  
51 treatment and after discharge.  
52  
53  
54  
55  
56  
57  
58  
59  
60



1  
2  
3  
4 Following each interview, the patient's GP was informed about the patient's actual  
5  
6 problems and needs for rehabilitation and encouraged to be proactive, i.e. the GP was  
7  
8 encouraged to contact the patient personally to offer support and guidance in order to  
9  
10 identify and address actual and future needs for rehabilitation. Subsequently, the GP  
11  
12 received an e-mail summarising the information, supplemented by general information  
13  
14 about cancer patients' needs and problems (Figure 3). The information was personally  
15  
16 conveyed by phone, if possible, and always sent electronically along with the more general  
17  
18 information. Patients and GPs in the control group received the usual care and were not  
19  
20 contacted by the rehabilitation coordinators (26).  
21  
22  
23  
24  
25

### 26 *Outcomes and sampling of data*

27  
28 The primary outcome was health-related quality of life measured 6 months after inclusion  
29  
30 using the Global Health Status of the European Organization for Research and Treatment  
31  
32 of Cancer Quality of Life Questionnaire Core 30 (EORTC QLQ-C30) (31;32). The  
33  
34 secondary outcomes were psychological distress at 14 months assessed by the 6 scales  
35  
36 of the Profile of Mood States (POMS) (33) (depression/dejection, anger/hostility,  
37  
38 tension/anxiety, vigour/activity, fatigue/inertia and confusion/bewilderment), and the Global  
39  
40 Health Status at 6 months and functional (physical, emotional, role, cognitive or social  
41  
42 functioning) and symptom scales (fatigue, nausea/vomiting, pain, dyspnoea, insomnia,  
43  
44 appetite loss, constipation, diarrhoea or financial difficulties) of the EORTC QLQ-C30 at 6  
45  
46 and 14 months.  
47  
48  
49

50  
51 Data were sampled in identical ways irrespective of allocation status by use of  
52  
53 patient questionnaires administered to patients alive at 6 and 14 months after inclusion.  
54  
55 Non-responders were sent one reminder after 3 weeks (26).  
56  
57  
58  
59  
60

### *Sample size*

The sample size was estimated based on the primary outcome measure. According to the EORTC Tables of Reference Values (34) for all cancer patients, all stages, the Global Health Status is normally distributed with a mean of 61.3 and an SD of 24.2. A change of at least 8 units was assumed to be clinically relevant (34;35).

If the lowest acceptable statistical power was 80%, then, based on the two-sample t-test with a type 1 error  $\alpha=0.05$ , the sample size was calculated to be 144 patients per group. The study was subject to clustering because the unit of randomisation was at the level of the GP, whereas the primary outcome measure was at the level of the patient. A strong effect on outcome of the individual practice was expected, but no data supported estimation of cluster effect. To allow maximum clustering it was attempted to include patients to each group from a minimum of 144 practices.

### *Randomisation*

Prior to study start, all 2181 general practices in Denmark were randomly allocated to the intervention or control group by the unique provider number of each practice using a computerised random-number generator in the statistical program Stata version 10.0 (StataCorp, College Station, TX, USA). Hence, randomisation was performed at practice level meaning that all GPs working under the same provider number were allocated to the same group. Consequently, spill-over effect between GPs and patients from the same practice was minimised.

### *Blinding*

1  
2  
3  
4 The study was not blinded. The list of randomisation was available to the RCs during  
5  
6 assessment of patient eligibility. Allocation status was obvious during intervention.  
7  
8  
9

### 10 *Statistical analysis*

11  
12 Baseline patient characteristics were described using descriptive statistics in order to  
13  
14 present the distribution of age, sex and cancer type. We conducted intention to treat  
15  
16 analyses and numerical outcomes of the RCT were analysed using a **multi-level linear**  
17  
18 **model, accounting for possible cluster effects caused by the cluster randomisation.** All  
19  
20 secondary outcomes were adjusted for confounding effect of age and sex. Missing values  
21  
22 were regarded as missing at random.  
23  
24

25  
26 The statistical analyses were performed using Stata version 11.0 (StataCorp,  
27  
28 College Station, TX, USA).  
29  
30

### 31 *Development and piloting of questionnaires and intervention*

32  
33 Before designing the intervention we established a theoretical basis through review of  
34  
35 papers, reports and textbooks about the problems faced by cancer patients and GPs with  
36  
37 respect to individual rehabilitation and continuity across healthcare sectors (1-3;16-24;36).  
38  
39  
40

41  
42 The questionnaires and the procedures of identification, assessment and inclusion  
43  
44 of patients were pilot tested prior to study start. The procedures have been described in  
45  
46 detail (26).  
47  
48  
49  
50  
51  
52  
53  
54  
55  
56  
57  
58  
59  
60

## Results

In total 955 patients fulfilled the criteria for inclusion and 486 patients were allocated to the intervention group and 469 to the control group (Figure 1). The patients were registered with 323 general practices. Patients were on average aged 63 years at baseline and 72% were female. The most frequent cancer localisations were breast (43%) and lung (15%). The intervention and control groups showed similar baseline characteristics (Table 1). For the primary outcome, Global Health Status at 6 months, we obtained data from 281 patients from 131 practices in the intervention group and 297 patients from 125 practices in the control group, in total 612 of 858 (71%) patients (95%-confidence interval for ICC 0.000 - 0.103) (Figure 1).

The intervention had no statistically significant impact on the primary or on the secondary outcomes (Tables 2 and 3). Adjustment for age and sex of the secondary outcomes showed results similar to the unadjusted analysis. Intention to treat analyses on all outcomes of the group of breast cancer patients showed no statistical differences between patients in the intervention and control group (mean difference in primary outcome of 1.77 (-3.2 to 6.8)). Per protocol analyses on all outcomes were used to analyse if the personal telephone contact to the GP was crucial. The patients receiving all elements of the intervention showed no statistically significant difference when compared to the control group (mean difference in primary outcome of -4.43 (-9.7 to 0.8)).

## Discussion

### *Principal findings*

This intervention including a hospital-based patient interview about rehabilitation, individual and general information to the GP and an encouragement to contact the patient and

1  
2  
3  
4 facilitate a process of rehabilitation did not improve quality of life or relieve psychological  
5  
6 distress of patients newly diagnosed with cancer.  
7  
8  
9

#### 10 *Strengths and weaknesses of the study*

11  
12 The study included 955 patients and the pre-study power calculation and the precision of  
13  
14 the statistical estimates indicate that the study could have detected relevant effects of the  
15  
16 intervention. The confidence interval of the difference in global health status after 6 months  
17  
18 ranged between -2.4 and 4.9 units. Clinically relevant differences have been suggested to  
19  
20 correspond to at least 8 units (34;35).  
21  
22  
23

24 An important question is whether any spill-over effects may have improved care for  
25  
26 the patients in the control group, leading to an apparently smaller impact of the  
27  
28 intervention. Information about the study and the concept of rehabilitation was given to the  
29  
30 staff at the involved departments at Vejle Hospital during the inclusion period, but the  
31  
32 intervention was managed by the two rehabilitation coordinators without influence on the  
33  
34 care provided for the patients in the control group. The cluster randomisation was  
35  
36 performed to ensure that GPs only cared for patients in either the intervention or the  
37  
38 control group. GPs in the control group were not informed about the study and we have no  
39  
40 reason to believe that information about the study was disseminated between GPs in the  
41  
42 two groups.  
43  
44  
45

46 Another question is whether we used the most relevant outcome measures.  
47  
48 Process measures are often used to evaluate interventions. However, despite successful  
49  
50 implementation of interventions, the impact on patients' wellbeing is often sparse. Hence,  
51  
52 we deliberately chose patients' quality of life as the primary outcome. Further, the EORTC  
53  
54  
55  
56  
57  
58  
59  
60

1  
2  
3  
4 QLQ-C30 and the POMS questionnaires are both well-validated instruments to evaluate  
5  
6 change of quality of life in cancer patients and psychological distress in general (31-35).  
7

8  
9 The intervention was designed to support rehabilitation irrespective of the character  
10  
11 of the problem, cancer type, age and sex. We included patients with various cancer types,  
12  
13 different prognosis, health problems and needs of supportive care. The inhomogeneity of  
14  
15 the study population might have diluted effects in groups of patients with specific problems  
16  
17 or diagnoses. It cannot be ruled out that a similar intervention might have effect on  
18  
19 subgroups of patients with specific cancers or special needs. However, no effect was  
20  
21 observed when analysing the large and rather homogeneous group of breast cancer  
22  
23 patients.  
24

25  
26 The intervention included a personal telephone contact to the patients' GP but some  
27  
28 GPs were not reachable (26). A priori we assumed that this personal contact could be of  
29  
30 major importance, but per protocol analysis showed no differences in outcomes for  
31  
32 patients where the rehabilitation coordinators managed to reach the GP by phone.  
33  
34

### 35 36 37 *Relations to other studies*

38  
39 To our knowledge, only three papers have specifically evaluated the impact of GP  
40  
41 involvement in cancer rehabilitation in a randomised design (17;36-37). A shared care  
42  
43 programme (n=250) conducted in Denmark in 2003 included transfer of knowledge from  
44  
45 oncologists to GPs, improved communication between parties, and active patient  
46  
47 involvement (17). This intervention had a positive impact on patient evaluation of  
48  
49 cooperation between primary and secondary healthcare sectors, but not on quality of life.  
50  
51 A Norwegian study from 2005 (n=91) evaluated the effect of an invitation to a 30-minute  
52  
53 consultation with the patient's GP, aiming at creating a closer and more frequent contact  
54  
55  
56  
57  
58  
59  
60

1  
2  
3  
4 between patients and GPs (36). No increase in number of consultations or improvement of  
5  
6 quality of life was observed. The latest study was conducted in Sweden in 2008 (n=481)  
7  
8 and tested the effectiveness of individual support, group rehabilitation and a combination  
9  
10 of the two compared to standard care (37). The individual support included individual  
11  
12 psychological and nutritional support along with intensified primary health care, including  
13  
14 extended information about the diagnosis, education in cancer care, and supervision of the  
15  
16 patient's home care nurse and GP by a multi-professional oncology team. **The Swedish**  
17  
18 study did not show an improvement either in quality of life or psychological well-being  
19  
20 when compared to standard care. **Further, a systematic review (38) including the three**  
21  
22 **studies concluded that none of the interventions improved quality of life or patient**  
23  
24 **wellbeing, but due to possible methodological problems further studies on the topic are**  
25  
26 **needed.**  
27  
28  
29  
30  
31  
32

### 33 *Meaning*

34  
35 Interventions aiming to give the GP an enhanced role in cancer rehabilitation seem to have  
36  
37 difficulties improving quality of life. Furthermore, a number of papers evaluating the effect  
38  
39 of various other types of interventions aiming to improve quality of life of cancer patients  
40  
41 (39-44) have demonstrated that this may be difficult in general. **To better understand the**  
42  
43 **intervention and the impact on GP and patient behaviour further studies will include**  
44  
45 **evaluation of process measures like GP proactivity, patient participation in different**  
46  
47 **rehabilitation activities, and GP and patient satisfaction.**  
48  
49  
50

51  
52 Future studies should evaluate the importance of the organisation of cancer  
53  
54 treatment and rehabilitation. Is an unclear organisation with many partners (hospital  
55  
56 departments, GPs, municipalities and private organisations) an impediment to effective  
57  
58  
59  
60

1  
2  
3  
4 rehabilitation? A well-organised system with defined roles and easy referral to various  
5  
6 elements of rehabilitation (specialised physiotherapy, social counselling, psychological  
7  
8 advice etc.) may be of importance for the effect of a GP intervention. To improve  
9  
10 rehabilitation it may also be important to develop screening tools that support identification  
11  
12 of patients with special needs. Initiatives supporting the GPs in undertaking a proactive  
13  
14 role for patients with special needs should be considered. The effect of interventions  
15  
16 should, however, be carefully evaluated in order to ensure efficient use of resources  
17  
18 before implementation.  
19  
20  
21  
22  
23  
24  
25  
26  
27  
28  
29  
30  
31  
32  
33  
34  
35  
36  
37  
38  
39  
40  
41  
42  
43  
44  
45  
46  
47  
48  
49  
50  
51  
52  
53  
54  
55  
56  
57  
58  
59  
60



Figure 1. Study flow.

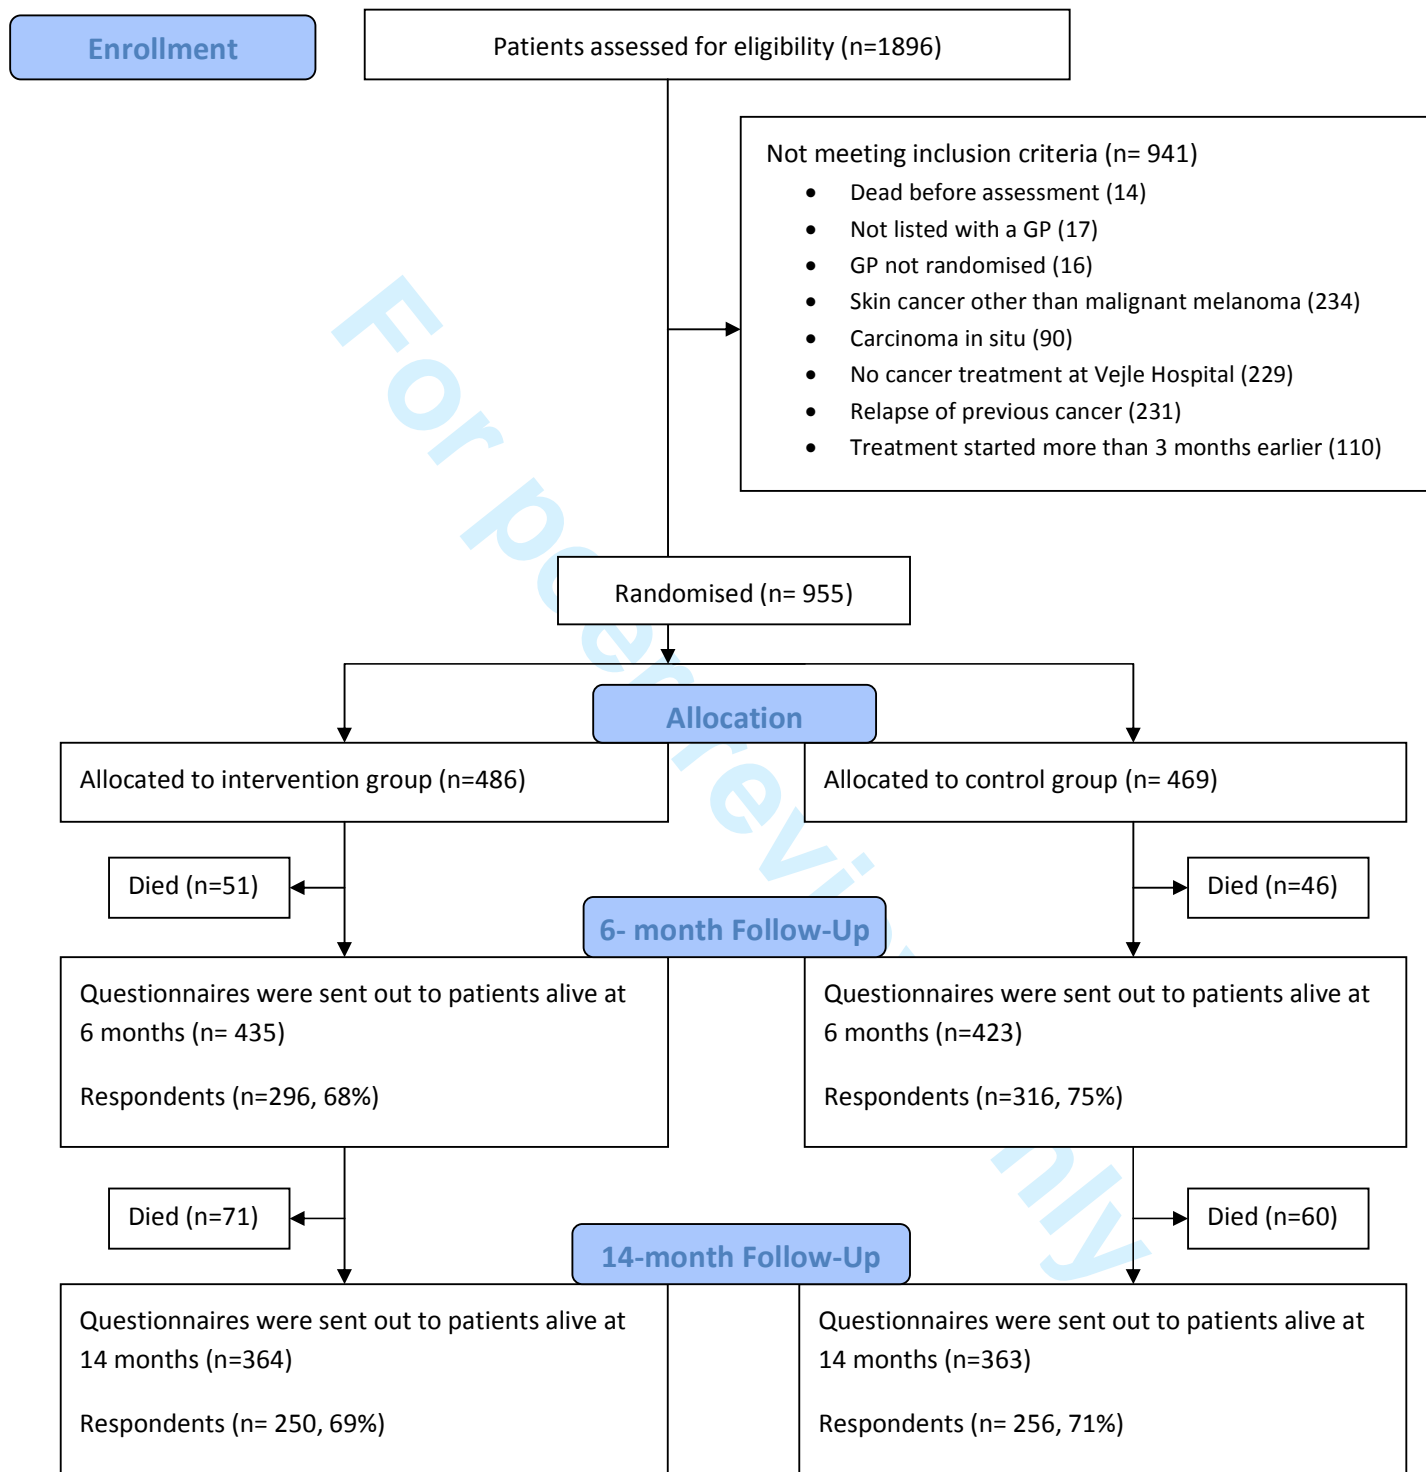

Figure 2. General needs and problems among cancer patients.

|                     |                                                                                                                                                                                                                                                                                                                                                                                                                                                                                                                                          |
|---------------------|------------------------------------------------------------------------------------------------------------------------------------------------------------------------------------------------------------------------------------------------------------------------------------------------------------------------------------------------------------------------------------------------------------------------------------------------------------------------------------------------------------------------------------------|
| Psychological level | <ul style="list-style-type: none"> <li>• Fear of death or recurrence</li> <li>• Guilt feelings about being sick</li> <li>• Anger at general practitioner or “system” for not having taken action soon enough</li> <li>• Troubles adjusting to new self-image</li> <li>• Sense of being left in limbo after discharge from the hospital</li> <li>• Risk of developing depression</li> <li>• Reconsiderations about priorities in life and how one wants to live life with or after a cancer disease</li> <li>• Sexual problems</li> </ul> |
| Social level        | <ul style="list-style-type: none"> <li>• Concerns about the well-being of spouse, children and other relatives</li> <li>• Changed body image or sexuality</li> <li>• Changed position/status in marriage, in family, at work, etc.</li> <li>• Concerns about possible infertility caused by treatment</li> <li>• Information about patient associations and similar groups for patients and relatives</li> </ul>                                                                                                                         |
| Physical level      | <ul style="list-style-type: none"> <li>• Physical capacity according to daily activities, need for special facilities, homecare, conversions of the home, etc.</li> <li>• Need for dietary advice, e.g. to prevent undue weight loss</li> <li>• Support in order to accept physical changes and late complications like tiredness, amputation, infertility, pain, etc.</li> </ul>                                                                                                                                                        |
| Work-related level  | <ul style="list-style-type: none"> <li>• Concerns about losing one's job</li> <li>• Concerns about having to give up one's former responsibilities or change field of work due to reduced ability to work</li> <li>• Opportunities for financial support during sick-leave, flexible job, etc.</li> <li>• Support to keep in contact with workplace during sick-leave</li> </ul>                                                                                                                                                         |
| Financial level     | <ul style="list-style-type: none"> <li>• Social rights like mileage allowances, reimbursement of assistive technology, etc.</li> <li>• Concerns about a decrease in income and consequences hereof in relation to housing, spouse, children, etc.</li> <li>• Conditions regarding pension or incapacity benefit</li> </ul>                                                                                                                                                                                                               |

Table 1. Baseline demographic and medical characteristics for all included patients (n=955).

| <b>Demographic characteristics</b> | Control group<br>(n=469) | Intervention group<br>(n=486) |
|------------------------------------|--------------------------|-------------------------------|
| Age, years                         |                          |                               |
| Mean (CI)                          | 63.6 (62.5 to 64.6)      | 63.2 (62.2 to 64.3)           |
| Median                             | 64                       | 64                            |
| Range                              | 21 to 98                 | 28 to 92                      |
| Sex                                |                          |                               |
| Male (%)                           | 134 (28.6)               | 133 (27.4)                    |
| Female (%)                         | 335 (71.4)               | 353 (72.6)                    |
| <b>Cancer type</b>                 | Numbers (%)              | Numbers (%)                   |
| Cancer of breast                   | 206 (43.9)               | 201 (41.4)                    |
| Cancer of lung                     | 69 (14.7)                | 75 (15.4)                     |
| Malignant melanoma                 | 44 (9.4)                 | 35 (7.2)                      |
| Cancer of rectum/anus              | 33 (7.0)                 | 45 (9.3)                      |
| Cancer of colon                    | 29 (6.2)                 | 39 (8.0)                      |
| Cancer of ovaries                  | 12 (2.6)                 | 9 (1.9)                       |
| Cancer of biliary system           | 7 (1.5)                  | 8 (1.6)                       |
| Cancer of brain                    | 6 (1.3)                  | 8 (1.6)                       |
| Cancer of prostate                 | 8 (1.7)                  | 3 (0.6)                       |
| Cancer of corpus uteri             | 6 (1.3)                  | 5 (1.0)                       |
| Myelomatosis                       | 6 (1.3)                  | 5 (1.0)                       |
| Lymphoma                           | 3 (0.6)                  | 4 (0.8)                       |
| Unspecified location               | 16 (3.4)                 | 16 (3.3)                      |
| Other diagnoses                    | 24 (5.1)                 | 33 (6.8)                      |

Table 2. Health-Related Quality of Life (EORTC QLQ-C30) outcome variables and mean differences at 6 and 14 months (95% confidence intervals).

| Outcome variable         | 6 months |                     |                          |      | 14 months |                     |                          |      |
|--------------------------|----------|---------------------|--------------------------|------|-----------|---------------------|--------------------------|------|
|                          | n        | Mean (CI)           | Mean difference (95% CI) | P    | n         | Mean (CI)           | Mean difference (95% CI) | P    |
| Global Health Status/qol |          |                     |                          |      |           |                     |                          |      |
| Control group            | 297      | 68.0 (65.5 to 70.5) |                          |      | 246       | 72.8 (70.3 to 75.3) |                          |      |
| Intervention group       | 281      | 69.3 (66.7 to 71.9) | 1.25 (-2.4 to 4.9)       | 0.50 | 240       | 72.1 (69.6 to 74.7) | -0.71 (-4.3 to 2.8)      | 0.69 |
| Physical functioning     |          |                     |                          |      |           |                     |                          |      |
| Control group            | 294      | 79.0 (76.4 to 81.5) |                          |      | 240       | 81.9 (79.3 to 84.5) |                          |      |
| Intervention group       | 280      | 79.7(77.1 to 82.4)  | 0.77 (-2.9 to 4.4)       | 0.68 | 234       | 82.0 (79.4 to 84.6) | -0.08 (-3.6 to 3.8)      | 0.97 |
| Role functioning         |          |                     |                          |      |           |                     |                          |      |
| Control group            | 291      | 71.3 (67.7 to 74.9) |                          |      | 239       | 78.0 (74.4 to 81.7) |                          |      |
| Intervention group       | 277      | 72.5 (68.8 to 76.1) | 1.18 (-3.9 to 6.3)       | 0.65 | 235       | 78.8 (75.0 to 82.5) | 0.70 (-4.5 to 5.9)       | 0.79 |
| Emotional functioning    |          |                     |                          |      |           |                     |                          |      |
| Control group            | 293      | 80.5 (78.1 to 83.0) |                          |      | 240       | 80.7 (77.9 to 83.4) |                          |      |
| Intervention group       | 278      | 81.6 (79.1 to 84.1) | 1.02 (-2.5 to 4.5)       | 0.57 | 238       | 80.8 (78.0 to 83.6) | 0.12 (-3.8 to 4.1)       | 0.95 |
| Cognitive functioning    |          |                     |                          |      |           |                     |                          |      |
| Control group            | 290      | 83.0 (80.5 to 85.5) |                          |      | 245       | 82.6 (79.7 to 85.5) |                          |      |
| Intervention group       | 278      | 83.9 (81.3 to 86.4) | 0.88 (-2.7 to 4.5)       | 0.63 | 238       | 85.1 (82.1 to 88.2) | 2.53 (-1.7 to 6.7)       | 0.24 |
| Social functioning       |          |                     |                          |      |           |                     |                          |      |
| Control group            | 295      | 85.7 (83.0 to 88.4) |                          |      | 242       | 88.2 (85.4 to 91.0) |                          |      |
| Intervention group       | 280      | 86.0 (83.2 to 88.8) | 0.28 (-3.6 to 4.2)       | 0.89 | 238       | 87.4 (84.6 to 90.3) | -0.77 (-4.8 to 3.2)      | 0.71 |
| Fatigue                  |          |                     |                          |      |           |                     |                          |      |
| Control group            | 292      | 37.4 (34.3 to 40.6) |                          |      | 244       | 32.1 (28.8 to 35.3) |                          |      |
| Intervention group       | 279      | 34.2 (30.9 to 37.4) | -3.27 (-7.8 to 1.3)      | 0.16 | 234       | 32.3 (28.9 to 35.6) | 0.23 (-4.5 to 4.9)       | 0.92 |
| Nausea and vomiting      |          |                     |                          |      |           |                     |                          |      |
| Control group            | 300      | 8.1 (6.1 to 10.0)   |                          |      | 244       | 5.5 (3.9 to 7.2)    |                          |      |
| Intervention group       | 284      | 8.0 (6.0 to 10.0)   | -0.11 (-2.9 to 2.7)      | 0.94 | 236       | 5.6 (3.9 to 7.3)    | 0.05 (-2.3 to 2.4)       | 0.97 |
| Pain                     |          |                     |                          |      |           |                     |                          |      |
| Control group            | 283      | 23.0 (19.8 to 26.2) |                          |      | 241       | 21.9 (18.5 to 25.4) |                          |      |
| Intervention group       | 274      | 22.0 (18.8 to 25.3) | -0.95 (-5.5 to 3.6)      | 0.68 | 234       | 21.4 (17.8 to 24.9) | -0.56 (-5.5 to 4.4)      | 0.83 |
| Dyspnoea                 |          |                     |                          |      |           |                     |                          |      |
| Control group            | 297      | 17.0 (13.9 to 20.2) |                          |      | 245       | 13.2 (10.0 to 16.5) |                          |      |
| Intervention group       | 286      | 17.9 (14.7 to 21.2) | 0.87 (-3.6 to 5.4)       | 0.71 | 233       | 15.4 (11.9 to 18.8) | 2.11 (-2.6 to 6.8)       | 0.38 |
| Insomnia                 |          |                     |                          |      |           |                     |                          |      |
| Control group            | 302      | 27.5 (24.0 to 31.0) |                          |      | 248       | 29.6 (25.6 to 33.6) |                          |      |
| Intervention group       | 285      | 27.3 (23.6 to 30.9) | -0.23 (-5.3 to 4.8)      | 0.93 | 240       | 28.5 (24.4 to 32.6) | -1.08 (-6.8 to 4.6)      | 0.71 |
| Appetite loss            |          |                     |                          |      |           |                     |                          |      |
| Control group            | 301      | 14.1 (11.0 to 17.2) |                          |      | 246       | 9.6 (7.1 to 12.2)   |                          |      |
| Intervention group       | 288      | 15.9 (12.7 to 19.0) | 1.79 (-2.7 to 6.2)       | 0.43 | 239       | 7.9 (5.4 to 10.5)   | -1.67 (-5.3 to 2.0)      | 0.37 |
| Constipation             |          |                     |                          |      |           |                     |                          |      |
| Control group            | 299      | 12.6 (9.7 to 15.5)  |                          |      | 248       | 11.9 (9.0 to 14.9)  |                          |      |
| Intervention group       | 284      | 11.3 (8.3 to 14.2)  | -1.33 (-5.4 to 2.8)      | 0.53 | 236       | 8.9 (5.9 to 11.9)   | -3.03 (-7.4 to 1.1)      | 0.16 |
| Diarrhoea                |          |                     |                          |      |           |                     |                          |      |
| Control group            | 299      | 11.3 (8.8 to 13.9)  |                          |      | 250       | 11.4 (8.5 to 14.2)  |                          |      |
| Intervention group       | 284      | 11.4 (8.8 to 14.1)  | 0.08 (-3.6 to 3.8)       | 0.97 | 238       | 10.0 (7.0 to 13.0)  | -1.38 (-5.5 to 2.8)      | 0.51 |
| Financial difficulties   |          |                     |                          |      |           |                     |                          |      |
| Control group            | 297      | 7.6 (5.4 to 9.8)    |                          |      | 242       | 6.5 (3.9 to 9.0)    |                          |      |
| Intervention group       | 284      | 8.0 (5.7 to 10.2)   | 0.34 (-2.8 to 3.5)       | 0.83 | 236       | 6.7 (4.1 to 9.4)    | 0.27 (-3.4 to 4.0)       | 0.89 |

Mean values from 0 to 100. A score of 100 indicates optimal function or maximum symptom intensity (i.e. for functional measures, an increase indicates improvement, while for symptoms, an increase indicates worsening)

Table 3. Psychological distress (POMS) at 14 months and mean differences between groups (95 confidence intervals).

| Outcome variable       | n   | Mean range | Mean (95% CI)         | Mean difference (95% CI) | P    |
|------------------------|-----|------------|-----------------------|--------------------------|------|
| Anger/hostility        |     | 0 to 28    |                       |                          |      |
| Control group          | 223 |            | 2.03 (1.59 to 2.48)   |                          |      |
| Intervention group     | 230 |            | 1.88 (1.43 to 2.33)   | -0.15 (-0.79 to 0.48)    | 0.64 |
| Confusion/bewilderment |     | 0 to 20    |                       |                          |      |
| Control group          | 229 |            | 2.45 (2.04 to 2.86)   |                          |      |
| Intervention group     | 231 |            | 2.11 (1.69 to 2.53)   | -0.34 (-0.92 to 0.25)    | 0.26 |
| Depression/dejection   |     | 0 to 32    |                       |                          |      |
| Control group          | 223 |            | 3.85 (3.20 to 4.51)   |                          |      |
| Intervention group     | 229 |            | 3.26 (2.61 to 3.92)   | -0.59 (-1.52 to 0.34)    | 0.21 |
| Fatigue/inertia        |     | 0 to 20    |                       |                          |      |
| Control group          | 226 |            | 4.65 (4.08 to 5.22)   |                          |      |
| Intervention group     | 234 |            | 4.14 (3.02 to 4.10)   | -0.51 (-1.32 to 0.29)    | 0.21 |
| Tension/anxiety        |     | 0 to 24    |                       |                          |      |
| Control group          | 226 |            | 3.82 (3.28 to 4.36)   |                          |      |
| Intervention group     | 233 |            | 3.56 (3.02 to 4.10)   | -0.26 (-1.02 to 0.50)    | 0.50 |
| Vigour/activity        |     | 0 to 24    |                       |                          |      |
| Control group          | 218 |            | 10.28 (9.51 to 11.05) |                          |      |
| Intervention group     | 228 |            | 10.09 (9.31 to 10.86) | -0.20 (-1.29 to 0.89)    | 0.72 |
| Total mood disturbance |     | 0 to 124   |                       |                          |      |
| Control group          | 200 |            | 4.87 (2.29 to 7.45)   |                          |      |
| Intervention group     | 210 |            | 4.19 (1.62 to 6.76)   | -0.68 (-4.32 to 2.97)    | 0.72 |

Mean values of each subscale depends on the number of items related to the individual subscale which varies from 5 to 8, each item ranging from 0 to 4. Total mood disturbance is calculated by summing up the scores on the five negative symptom subscales and subtracting the score on the one positively scored subscale, vigour/activity. A higher score indicates a higher degree of symptoms/feelings within the related subscale.

## Contributors

SHB, JK, JS and DGH contributed to conception and study design. SHB, DGH, JK and JS obtained the funding. SHB, JK, JS and DGH wrote the protocol. SHB and DGH were responsible for recruitment of patients. SHB collected and managed the data. PVL was the study statistician. SHB and PVL performed the statistical analysis. SHB, PVL, JK, JS and DGH contributed to the interpretation of data. SHB drafted the first version of the manuscript. SHB, JK, JS, PVL and DGH critically reviewed, revised, and supplemented the manuscript. All authors approved the final version. SHB is the guarantor.

## Licence for publication

The Corresponding Author has the right to grant on behalf of all authors and does grant on behalf of all authors, an exclusive licence (or non exclusive for government employees) on a worldwide basis to the BMJ Publishing Group Ltd and its licensees, to permit this article (if accepted) to be published in BMJ editions and any other BMJPG products and to exploit all subsidiary rights, as set out in our licence (<http://resources.bmj.com/bmj/authors/checklists-forms/licence-for-publication>).

## Funding

This study was funded by the Danish Cancer Society, the Novo Nordisk Foundation and the Region of Southern Denmark. The National Research Center for Cancer Rehabilitation is funded by the Danish Cancer Society. The authors' work was independent from the funders.

## Competing interests

All authors have completed the ICMJE uniform disclosure form at [www.icmje.org/coi\\_disclosure.pdf](http://www.icmje.org/coi_disclosure.pdf) and declare: no support from any organisation for the submitted

21 Enhanced involvement of general practitioners in cancer rehabilitation: a RCT, December 2011, Stinne Holm Bergholdt  
work; no financial relationships with any organisations that might have an interest in the submitted  
work in the previous 3 years; no other relationships or activities that could appear to have  
influenced the submitted work.

### **Ethical approval**

The study was approved by the Danish Data Protection Agency. The Regional Committee on Biomedical Research Ethics evaluated the project and concluded that the intervention did not need an approval from the Danish National Committee on Biomedical Research Ethics according to Danish law (Project-ID: S-20082000-7).

### **Data**

All authors had full access to all of the data in the study and can take responsibility for the integrity of the data and the accuracy of the data analysis.

### **Data sharing**

No additional data available.

### **Acknowledgement**

The authors wish to thank all patients and health care professionals who took part in the study. We also wish to thank Lise Keller Stark, Research Unit of General Practice, University of Southern Denmark, for proofreading the manuscript and Susanne Døssing Berntsen for managing datasets.

## References

- (1) Mikkelsen TH, Sondergaard J, Jensen AB, Olesen F. Cancer rehabilitation: psychosocial rehabilitation needs after discharge from hospital? *Scand J Prim Health Care* 2008;26:216-21.
- (2) Hewitt M, Greenfield S, Stovall E. *From Cancer Patient to Cancer Survivor: Lost in Transition*. The National Academies Press, Washington, D.C.: Committee on Cancer Survivorship. Improving Care and Quality of Life, National Cancer Policy Board, Institute of Medicine, and National Research Council; 2006.
- (3) Groenvold M, Pedersen C, Jensen CR, Faber MT, Johnsen AT. *The cancer patient's world- an investigation of the problems experienced by Danish cancer patients*. Danish Cancer Society, Copenhagen 2006 [in Danish].
- (4) Schmid-Buchi S, Halfens RJ, Dassen T, van den Borne B. Psychosocial problems and needs of posttreatment patients with breast cancer and their relatives. *Eur J Oncol Nurs* 2010; Jan 18. DOI:10.1016/j.ejon.2009.11.001.
- (5) Steele R, Fitch MI. Supportive care needs of patients with lung cancer. *Can Oncol Nurs J* 2010;20(1):15-22.
- (6) Steele R, Fitch MI. Supportive care needs of women with gynaecological cancer. *Cancer Nurs* 2008;31:284-91.
- (7) Armes J, Crowe M, Colbourne L, Morgan H, Murrels T, Oakley C, Palmer N, Ream E, Young A, Richardson A. Patients' supportive care needs beyond the end of cancer treatment: a prospective, longitudinal survey. *J Clin Oncol* 2009;27:6172-9.
- (8) McDowell ME, Occhipinti S, Ferguson M, Dunn J, Chambers SK. Predictors of change in unmet supportive care needs in cancer. *Psycho-Oncology* 2010;19:508-16.
- (9) World Health Organisation [internet] at <http://www.who.int/topics/rehabilitation/en>. Accessed on November 18, 2011.



- 23 Enhanced involvement of general practitioners in cancer rehabilitation: a RCT, December 2011, Stinne Holm Bergholdt
- 1 (10) Jones R, Regan M, Ristevski E, Breen S. Patients' perception of communication with  
2 clinicians during screening and discussion of cancer supportive care needs. *Patient Educ*  
3 *Couns* 2011. Jan 18. DOI: 10.1016/j.pec.2010.12.006.  
4
  - 5 (11) Earle CC. Failing to plan is planning to fail: improving the quality of care with survivorship  
6 care plans. *J Clin Oncol* 2006;24:5112-6.  
7
  - 8 (12) Gilbert SM, Miller DC, Hollenbeck BK, Montie JE, Wei JT. Cancer survivorship: challenges  
9 and changing paradigms. *J Urol* 2008;179:431-8.  
10
  - 11 (13) Houlihan NG. Transitioning to cancer survivorship: plans of care. *Oncology* 2009;23(8  
12 Suppl):42-8.  
13
  - 14 (14) Olesen F, Dickinson J, Hjortdahl P. General practice- time for a new definition. *BMJ*  
15 2000;320:354-7.  
16
  - 17 (15) Grunfeld E, Earle CC. The interface between primary and oncology specialty care:  
18 Treatment through survivorship. *J Natl Cancer Inst Monogr* 2010;2010(40):25-30.  
19
  - 20 (16) Smith SM, Allwright S, O'Dowd T. Does sharing care across the primary-specialty interface  
21 improve outcomes in chronic disease? A systematic review. *Am J Manag Care*  
22 2008;14:213-24.  
23
  - 24 (17) Nielsen JD, Palshof T, Mainz J, Jensen AB, Olesen F. Randomised controlled trial of a  
25 shared care programme for newly referred cancer patients: bridging the gap between  
26 general practice and hospital. *Qual Saf Health Care* 2003;12:263-72.  
27
  - 28 (18) Grunfeld E. Primary care physicians and oncologists are players on the same team. *J Clin*  
29 *Oncol* 2008;26:2246-7.  
30
  - 31 (19) Grunfeld E. Cancer survivorship: a challenge for primary care physicians. *Br J Gen Pract*  
32 2005;55:741-2.  
33
  - 34 (20) Johansson B, Berglund G, Hoffman K, Glimelius B, Sjoden PO. The role of the general  
35 practitioner in cancer care and the effect of an extended information routine. *Scand J Prim*  
36 *Health Care* 2000;18:143-8.  
37  
38  
39  
40  
41  
42  
43  
44  
45  
46  
47  
48  
49  
50  
51  
52  
53  
54  
55  
56  
57  
58  
59  
60

- 24 Enhanced involvement of general practitioners in cancer rehabilitation: a RCT, December 2011, Stinne Holm Bergholdt
- (21) Kendall M, Boyd K, Campbell C, Cormie P, Fife S, Thomas K, et al. How do people with cancer wish to be cared for in primary care? Serial discussion groups of patients and carers. *Fam Pract* 2006;23:644-50.
  - (22) Anvik T, Holtedahl KA, Mikalsen H. "When patients have cancer, they stop seeing me"--the role of the general practitioner in early follow-up of patients with cancer--a qualitative study. *BMC Fam Pract* 2006;7:19.
  - (23) Bulsara C, Ward AM, Joske D. Patient perceptions of the GP role in cancer management. *Aust Fam Physician* 2005;34:299-300,302.
  - (24) Mikkelsen TH. PhD-thesis: Cancer rehabilitation in Denmark – with particular focus on the present and future role of general practice. Faculty of Health Sciences, University of Aarhus, Denmark, 2009. ISBN 978-87-90004-09-5.
  - (25) Kendall M, Boyd K, Campbell C, Cormie P, Fife S, Thomas K, et al. How do people with cancer wish to be cared for in primary care? Serial discussion groups of patients and carers. *Fam Pract* 2006;23:644-50.
  - (26) Hansen DG, Bergholdt SH, Holm L, Kragstrup J, Bladt T, Søndergaard J. A complex intervention to enhance the involvement of general practitioners in cancer rehabilitation. Protocol for a randomised controlled trial and feasibility study of a multimodal intervention. *Acta Oncol* 2011;50:299-306.
  - (27) Source: [www.regionsyddanmark.dk](http://www.regionsyddanmark.dk); 2009.
  - (28) PLO Praksistælling [General Practitioners' Organisation Practice Count] Copenhagen, 2009.
  - (29) Kurtz SM, Silverman JD. The Calgary-Cambridge Referenced Observation Guides: an aid to defining the curriculum and organizing the teaching in communication training programmes. *Med Educ* 1996;30:83-9.
  - (30) Mikkelsen T, Søndergaard J, Sokolowski I, Jensen A, Olesen F. Cancer survivors' rehabilitation needs in a primary health care context. *Fam Pract* 2009;26:221-30.

- 25 Enhanced involvement of general practitioners in cancer rehabilitation: a RCT, December 2011, Stinne Holm Bergholdt
- 1 (31) Aaronson NK, Ahmedzai S, Bergman B, Bullinger M, Cull A, Duez NJ, et al. The European  
2  
3 Organization for Research and Treatment of Cancer QLQ-C30: a quality-of-life instrument  
4  
5 for use in international clinical trials in oncology. *J Natl Cancer Inst* 1993;85:365-76.  
6  
7 (32) Groenvold M, Klee MC, Sprangers MA, Aaronson NK. Validation of the EORTC QLQ-C30  
8  
9 quality of life questionnaire through combined qualitative and quantitative assessment of  
10  
11 patient-observer agreement. *J Clin Epidemiol* 1997;50:441-50.  
12  
13 (33) Baker F, Denniston M, Zabora J, Polland A, Dudley WN. A POMS short form for cancer  
14  
15 patients: psychometric and structural evaluation. *Psycho-Oncology* 2002;11:273-81.  
16  
17 (34) Scott NW, Fayers PM, Aaronson NK, Bottomley A, de Graeff A, Groenvold M, Gundy C,  
18  
19 Koller M, Petersen MA, Sprangers MAG. EORTC QLQ-C30 Reference Values Manual.  
20  
21 EORTC Quality of Life Group 2008.  
22  
23 (35) Cocks K, King MT, Velikova G, St-James MM, Fayers P, Brown J. Evidence-based  
24  
25 guidelines for determination of sample size and interpretation of the European Organisation  
26  
27 for the Research and Treatment of cancer Quality of Life Questionnaire Core 30. *J Clin*  
28  
29 *Oncol* 2010;29:89-96. DOI: 10.1200/JCO.2010.28.0107.  
30  
31 (36) Holtedal K, Norum J, Anvik T, Richardsen E. Do cancer patients benefit from short-term  
32  
33 contact with a general practitioner following cancer treatment? A randomised, controlled  
34  
35 study. *Support Care Cancer* 2005;13:949-956.  
36  
37 (37) Johansson B, Brandberg Y, Hellbom M, Persson C, Petersson LM, Berglund G, Glimelius  
38  
39 B. Health-related quality of life and distress in cancer patients: results from a large  
40  
41 randomised study. *Br J Cancer* 2008;99:1975-83.  
42  
43 (38) Lewis RA, Neal RD, Williams NH, France B, Hendry M, Russell D, Hughes DA, Russell I,  
44  
45 Stuart NS, Weller D, Wilkinson C. Follow-up of cancer in primary care versus secondary  
46  
47 care: systematic review. *Br J Gen Pract* 2009 Jul;59(564):e234-47.  
48  
49 (39) Aranda S, Schofield P, Weih L, Milne D, Yates P, Faulkner R. Meeting the support and  
50  
51 information needs of women with advanced breast cancer: a randomised controlled trial. *Br*  
52  
53 *J Cancer* 2006;95:667-73.  
54  
55  
56  
57  
58  
59  
60

- 26 Enhanced involvement of general practitioners in cancer rehabilitation: a RCT, December 2011, Stinne Holm Bergholdt
- 1  
2  
3  
4  
5  
6  
7  
8  
9  
10  
11  
12  
13  
14  
15  
16  
17  
18  
19  
20  
21  
22  
23  
24  
25  
26  
27  
28  
29  
30  
31  
32  
33  
34  
35  
36  
37  
38  
39  
40  
41  
42  
43  
44  
45  
46  
47  
48  
49  
50  
51  
52  
53  
54  
55  
56  
57  
58  
59  
60
- (40) Rottmann N, Dalton SO, Bidstrup PE, Würtzen H, Høybye MT, Ross L, Christensen J, Frederiksen K, Hansen DG, Johansen C. No improvement in distress and quality of life following psychosocial cancer rehabilitation. A randomised trial. *Psycho-Oncology* 2011;Feb. 8. DOI: 10.1002/pon.1924.
- (41) Ross L, Boesen EH, Dalton SO, Johansen C. Mind and cancer: does psychosocial intervention improve survival and psychological well-being? *Eur J Cancer* 2002;38;1447-57.
- (42) Fors EA, Bertheussen GF, Thune I, Juvet LK, Elvsaa IK, Oldervoll L, Anker G, Falkmer U, Lundgren S, Leivseth G. Psychosocial interventions as part of breast cancer rehabilitation programs? Results from a systematic review. *Psycho-Oncology* 2010; Sep 6. DOI: 10.1002/pon.1844
- (43) Newell SA, Sanson-Fisher RW, Savolainen NJ. Systematic review of psychological therapies for cancer Patients: overview and recommendations for future research. *J Natl Cancer Inst* 2002;94:558-84.
- (44) Uitterhoeve RJ, Vernooy M, Litjens M, Potting K, Bensing J, De Mulder P, Achterberg T van. Psychosocial interventions for patients with advanced cancer- a systematic review of the literature. *Br J Cancer* 2004;91:1050-62.

## Checklist of items to include when reporting a cluster randomised trial

| * = addition to CONSORT <i>Modifications to checklist in italics</i> |      |                                                                                                                                                                                                                                                                                                                                                                                                  |                      |
|----------------------------------------------------------------------|------|--------------------------------------------------------------------------------------------------------------------------------------------------------------------------------------------------------------------------------------------------------------------------------------------------------------------------------------------------------------------------------------------------|----------------------|
| PAPER SECTION and topic                                              | Item | Descriptor                                                                                                                                                                                                                                                                                                                                                                                       | Reported on Page No. |
| <i>TITLE &amp; ABSTRACT</i>                                          | 1*   | How participants were allocated to interventions (e.g., “random allocation”, “randomised”, or “randomly assigned”), <i>specifying that allocation was based on clusters</i>                                                                                                                                                                                                                      | 2                    |
| <i>INTRODUCTION</i><br>Background                                    | 2*   | Scientific background and explanation of rationale, <i>including the rationale for using a cluster design.</i>                                                                                                                                                                                                                                                                                   | 4+8                  |
| <i>METHODS</i><br>Participants                                       | 3*   | Eligibility criteria for participants <i>and clusters</i> and the settings and locations where the data were collected.                                                                                                                                                                                                                                                                          | 5                    |
| Interventions                                                        | 4*   | Precise details of the interventions intended for each group, <i>whether they pertain to the individual level, the cluster level or both</i> , and how and when they were actually administered.                                                                                                                                                                                                 | 6-7                  |
| Objectives                                                           | 5*   | Specific objectives and hypotheses, <i>and whether they pertain to the individual level, the cluster level or both.</i>                                                                                                                                                                                                                                                                          | 4                    |
| Outcomes                                                             | 6*   | Report clearly defined primary and secondary outcome measures, <i>whether they pertain to the individual level, the cluster level or both</i> , and, when applicable, any methods used to enhance the quality of measurements (e.g., multiple observations, training of assessors).                                                                                                              | 7                    |
| Sample size                                                          | 7*   | How <i>total</i> sample size was determined ( <i>including method of calculation, number of clusters, cluster size, a coefficient of intracluster correlation (ICC or k), and an indication of its uncertainty</i> ) and, when applicable, explanation of any interim analyses and stopping rules.                                                                                               | 8                    |
| Randomisation.<br>Sequence generation                                | 8*   | Method used to generate the random allocation sequence, including details of any restriction (e.g., blocking, stratification, <i>matching</i> ).                                                                                                                                                                                                                                                 | 5+8                  |
| Allocation concealment                                               | 9*   | Method used to implement the random allocation sequence, <i>specifying that allocation was based on clusters rather than individuals and clarifying whether the sequence was concealed until interventions were assigned.</i>                                                                                                                                                                    |                      |
| Implementation                                                       | 10   | Who generated the allocation sequence, who enrolled participants, and who assigned participants to their groups.                                                                                                                                                                                                                                                                                 |                      |
| Blinding (Masking)                                                   | 11   | Whether or not participants, those administering the interventions, and those assessing the outcomes were blinded to group assignment. If done, how the success of blinding was evaluated.                                                                                                                                                                                                       | 8-9                  |
| Statistical methods                                                  | 12*  | Statistical methods used to compare groups for primary outcome(s) <i>indicating how clustering was taken into account</i> ; methods for additional analyses, such as subgroup analyses and adjusted analyses.                                                                                                                                                                                    | 9                    |
| <i>RESULTS</i><br>Participant flow                                   | 13*  | Flow of <i>clusters and</i> individual participants through each stage (a diagram is strongly recommended). Specifically, for each group report the numbers of <i>clusters and</i> participants randomly assigned, receiving intended treatment, completing the study protocol, and analyzed for the primary outcome. Describe protocol deviations from study as planned, together with reasons. | 10+15 (Figure 1)     |
| Recruitment                                                          | 14   | Dates defining the periods of recruitment and follow-up.                                                                                                                                                                                                                                                                                                                                         | 5+15 (Figure 1)      |
| Baseline data                                                        | 15*  | Baseline information for each group <i>for the individual and cluster levels as applicable</i>                                                                                                                                                                                                                                                                                                   | 17 (Table 1)         |
| Numbers analyzed                                                     | 16*  | Number of <i>clusters and</i> participants (denominator) in each group included in each analysis and whether the analysis was by “intention-to-treat”. State the results in absolute numbers when feasible (e.g., 10/20, not 50%).                                                                                                                                                               | 10                   |
| Outcomes and Estimation                                              | 17*  | For each primary and secondary outcome, a summary of results for each group measures <i>for the individual or cluster level as applicable</i> , and the estimated effect size and its precision (e.g., 95% confidence interval) <i>and a coefficient of intracluster correlation (ICC or k) for each primary outcome.</i>                                                                        | 10+18-19 (Table 2+3) |
| Ancillary analyses                                                   | 18   | Address multiplicity by reporting any other analyses performed,                                                                                                                                                                                                                                                                                                                                  | 10                   |

|                                     |     |                                                                                                                                                                                      |       |
|-------------------------------------|-----|--------------------------------------------------------------------------------------------------------------------------------------------------------------------------------------|-------|
|                                     |     | including subgroup analyses and adjusted analyses, indicating those pre-specified and those exploratory.                                                                             |       |
| Adverse events                      | 19  | All important adverse events or side effects in each intervention group.                                                                                                             | None  |
| <i>DISCUSSION</i><br>Interpretation | 20  | Interpretation of the results, taking into account study hypotheses, sources of potential bias or imprecision and the dangers associated with multiplicity of analyses and outcomes. | 10-12 |
| Generalisability                    | 21* | Generalisability (external validity) <i>to individuals and/or clusters (as relevant)</i> of the trial findings.                                                                      | 12-13 |
| Overall evidence                    | 22  | General interpretation of the results in the context of current evidence.                                                                                                            | 13-14 |

For peer review only

Figure 1

1  
2  
3  
4  
5  
6  
7  
8  
9  
10  
11  
12  
13  
14  
15  
16  
17  
18  
19  
20  
21  
22  
23  
24  
25  
26  
27  
28  
29  
30  
31  
32  
33  
34  
35  
36  
37  
38  
39  
40  
41  
42  
43  
44  
45  
46  
47  
48  
49  
50  
51  
52  
53  
54  
55  
56  
57  
58  
59  
60

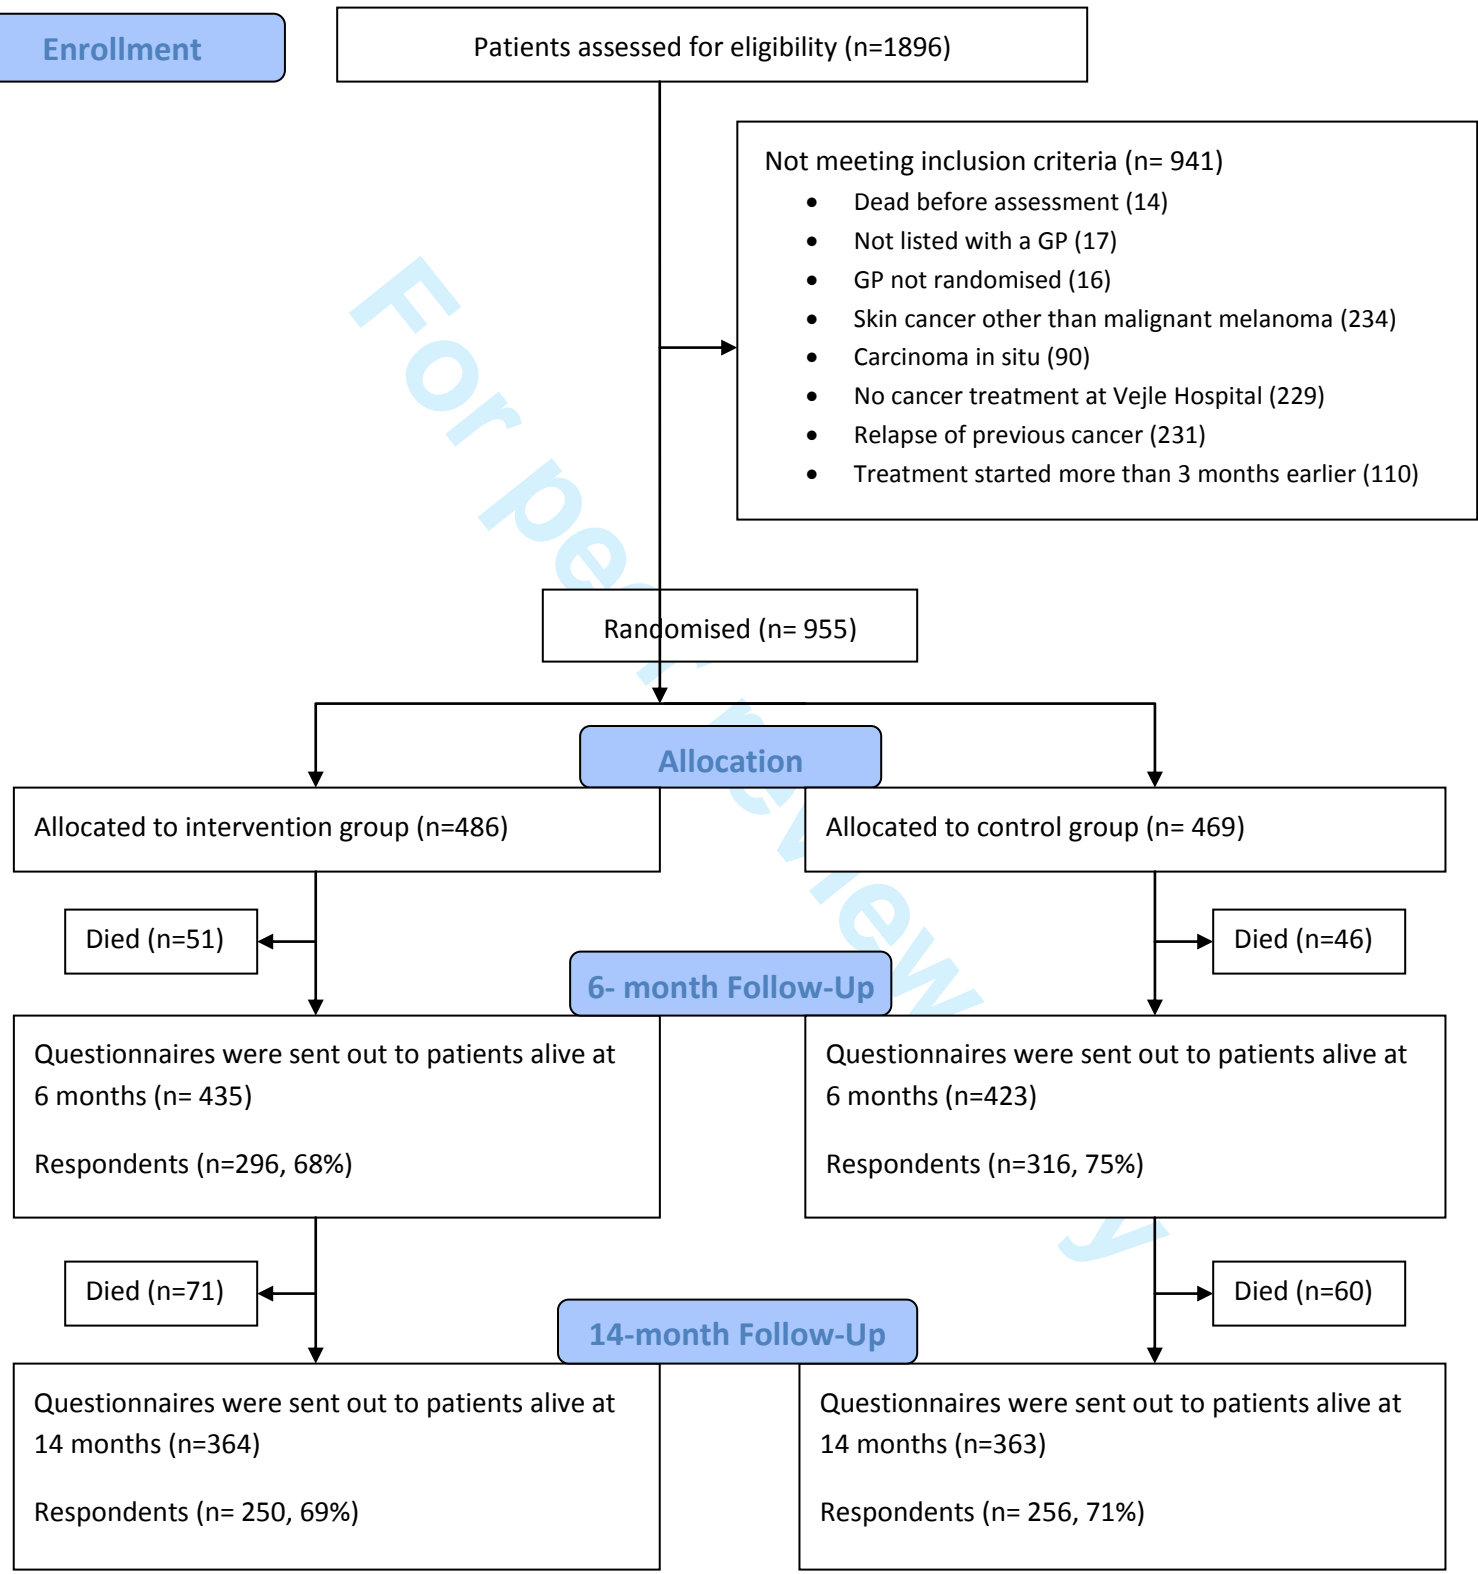

Figure 2. General needs and problems among cancer patients.

|                     |                                                                                                                                                                                                                                                                                                                                                                                                                                                                                                                                          |
|---------------------|------------------------------------------------------------------------------------------------------------------------------------------------------------------------------------------------------------------------------------------------------------------------------------------------------------------------------------------------------------------------------------------------------------------------------------------------------------------------------------------------------------------------------------------|
| Psychological level | <ul style="list-style-type: none"> <li>• Fear of death or recurrence</li> <li>• Guilt feelings about being sick</li> <li>• Anger at general practitioner or “system” for not having taken action soon enough</li> <li>• Troubles adjusting to new self-image</li> <li>• Sense of being left in limbo after discharge from the hospital</li> <li>• Risk of developing depression</li> <li>• Reconsiderations about priorities in life and how one wants to live life with or after a cancer disease</li> <li>• Sexual problems</li> </ul> |
| Social level        | <ul style="list-style-type: none"> <li>• Concerns about the well-being of spouse, children and other relatives</li> <li>• Changed body image or sexuality</li> <li>• Changed position/status in marriage, in family, at work, etc.</li> <li>• Concerns about possible infertility caused by treatment</li> <li>• Information about patient associations and similar groups for patients and relatives</li> </ul>                                                                                                                         |
| Physical level      | <ul style="list-style-type: none"> <li>• Physical capacity according to daily activities, need for special facilities, homecare, conversions of the home, etc.</li> <li>• Need for dietary advice, e.g. to prevent undue weight loss</li> <li>• Support in order to accept physical changes and late complications like tiredness, amputation, infertility, pain, etc.</li> </ul>                                                                                                                                                        |
| Work-related level  | <ul style="list-style-type: none"> <li>• Concerns about losing one’s job</li> <li>• Concerns about having to give up one’s former responsibilities or change field of work due to reduced ability to work</li> <li>• Opportunities for financial support during sick-leave, flexible job, etc.</li> <li>• Support to keep in contact with workplace during sick-leave</li> </ul>                                                                                                                                                         |
| Financial level     | <ul style="list-style-type: none"> <li>• Social rights like mileage allowances, reimbursement of assistive technology, etc.</li> <li>• Concerns about a decrease in income and consequences hereof in relation to housing, spouse, children, etc.</li> <li>• Conditions regarding pension or incapacity benefit</li> </ul>                                                                                                                                                                                                               |
